# Supplementary material for: Efficacy of probiotics in the management of halitosis: a systematic review and meta-analysis
Source: PubMed Central journal article supplement — BMJ Open. 2022 Dec 1;12(12):e060753. doi: 10.1136/bmjopen-2022-060753 (PMC9809225; doi:10.1136/bmjopen-2022-060753), 2022-12-01
Supplement: bmjopen-2022-060753.draft_revisions.pdf [file bmjopen-2022-060753.draft_revisions.pdf]

# BMJ Open

BMJ Open is committed to open peer review. As part of this commitment we make the peer review history of every article we publish publicly available.

When an article is published we post the peer reviewers' comments and the authors' responses online. We also post the versions of the paper that were used during peer review. These are the versions that the peer review comments apply to.

The versions of the paper that follow are the versions that were submitted during the peer review process. They are not the versions of record or the final published versions. They should not be cited or distributed as the published version of this manuscript.

BMJ Open is an open access journal and the full, final, typeset and author-corrected version of record of the manuscript is available on our site with no access controls, subscription charges or pay-per-view fees (<http://bmjopen.bmj.com>).

If you have any questions on BMJ Open's open peer review process please email [info.bmjopen@bmj.com](mailto:info.bmjopen@bmj.com)

# BMJ Open

## The efficacy of probiotics in the management of halitosis: A systematic review and meta-analysis

|                               |                                                                                                                                                                                                                                                                                                                                                                                                                                                                                            |
|-------------------------------|--------------------------------------------------------------------------------------------------------------------------------------------------------------------------------------------------------------------------------------------------------------------------------------------------------------------------------------------------------------------------------------------------------------------------------------------------------------------------------------------|
| Journal:                      | <i>BMJ Open</i>                                                                                                                                                                                                                                                                                                                                                                                                                                                                            |
| Manuscript ID                 | bmjopen-2022-060753                                                                                                                                                                                                                                                                                                                                                                                                                                                                        |
| Article Type:                 | Original research                                                                                                                                                                                                                                                                                                                                                                                                                                                                          |
| Date Submitted by the Author: | 04-Jan-2022                                                                                                                                                                                                                                                                                                                                                                                                                                                                                |
| Complete List of Authors:     | li, jinjin; Sichuan University,<br>Huang, Nengwen; Sichuan University, Department of Head and Neck Oncology<br>Qiao, Xianghe; Sichuan University, Department of Head and Neck Oncology<br>Wu, Yongzhi; Sichuan University, Department of Head and Neck Oncology<br>Liu, Yunkun; Sichuan University, Department of Head and Neck Oncology<br>Wu, chenzhou; Sichuan University West China Hospital of Stomatology<br>Li, Longjiang; Sichuan University, Department of Head and Neck Oncology |
| Keywords:                     | Microbiology < PATHOLOGY, Infectious diseases & infestations < DERMATOLOGY, Public health < INFECTIOUS DISEASES                                                                                                                                                                                                                                                                                                                                                                            |
|                               |                                                                                                                                                                                                                                                                                                                                                                                                                                                                                            |

SCHOLARONE™  
Manuscripts

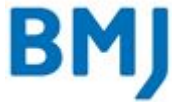

I, the Submitting Author has the right to grant and does grant on behalf of all authors of the Work (as defined in the below author licence), an exclusive licence and/or a non-exclusive licence for contributions from authors who are: i) UK Crown employees; ii) where BMJ has agreed a CC-BY licence shall apply, and/or iii) in accordance with the terms applicable for US Federal Government officers or employees acting as part of their official duties; on a worldwide, perpetual, irrevocable, royalty-free basis to BMJ Publishing Group Ltd ("BMJ") its licensees and where the relevant Journal is co-owned by BMJ to the co-owners of the Journal, to publish the Work in this journal and any other BMJ products and to exploit all rights, as set out in our [licence](#).

The Submitting Author accepts and understands that any supply made under these terms is made by BMJ to the Submitting Author unless you are acting as an employee on behalf of your employer or a postgraduate student of an affiliated institution which is paying any applicable article publishing charge ("APC") for Open Access articles. Where the Submitting Author wishes to make the Work available on an Open Access basis (and intends to pay the relevant APC), the terms of reuse of such Open Access shall be governed by a Creative Commons licence – details of these licences and which [Creative Commons](#) licence will apply to this Work are set out in our licence referred to above.

Other than as permitted in any relevant BMJ Author's Self Archiving Policies, I confirm this Work has not been accepted for publication elsewhere, is not being considered for publication elsewhere and does not duplicate material already published. I confirm all authors consent to publication of this Work and authorise the granting of this licence.

1  
2  
3  
4  
5 1 **Title page**  
6

7 2 **Title:** The efficacy of probiotics in the management of halitosis: A systematic review and meta-  
8 3 analysis

9 4 Jinjin Li<sup>1</sup> Nengwen Huang<sup>1</sup> Xianghe Qiao<sup>1</sup> Yongzhi Wu<sup>1</sup> Yunkun Liu<sup>1</sup> Chenzhou Wu<sup>1</sup> Longjiang Li<sup>1\*</sup>

10 5 <sup>1</sup>State Key Laboratory of Oral Diseases, National Clinical Research Center for Oral Diseases,  
11 6 Department of Head and Neck Oncology, West China Hospital of Stomatology, Sichuan University,  
12 7 Chengdu, China

13 8 **\*Corresponding author:**

14 9 Prof. Longjiang Li

15 10 E-mail: [muzili63@163.com](mailto:muzili63@163.com)

16 11 **Running title:** Probiotic treatment of halitosis  
17  
18  
19  
20  
21

22 12 **ABSTRACT**  
23

24 13 **Objectives** Halitosis is defined as a foul odor emitted from the oral cavity. Many interventions have  
25 14 been used to control halitosis from mouthwashes to chewing gums. Probiotics have been reported as  
26 15 an alternative method to alleviate halitosis. The present study aimed to investigate the effect of  
27 16 probiotics on halitosis.

28 17 **Design and methods** This is a meta-analysis study. A search was performed in indexed databases up  
29 18 to February 2021. Randomized controlled trials were included that compared probiotics and placebo  
30 19 concerning primary outcomes of organoleptic scores and volatile sulfur compounds levels. Data  
31 20 extraction and quality assessment were conducted independently by two reviewers.

32 21 **Results** Standardized mean difference (SMD) and 95% confidence interval (CI) were calculated to  
33 22 synthesize data. The data were sub-grouped and analyzed in the short term ( $\leq 4$  weeks) and long term  
34 23 ( $> 4$  weeks) based on the follow-up time. Seven articles were included in this review. For primary  
35 24 outcomes in the short term ( $\leq 4$  weeks), organoleptic scores [SMD= -0.58; 95%CI (-0.87, -0.30),  
36 25  $p < 0.0001$ ] and volatile sulfur compounds levels [SMD= -0.26; 95%CI (-0.51, -0.01),  $p = 0.04$ ]  
37 26 significantly decreased in the probiotics group compared with the placebo group. However, a  
38 27 significant reduction was observed only in organoleptic scores [SMD= -0.45; 95%CI (-0.85, -0.04),  
39 28  $p = 0.03$ ] in the long term ( $> 4$  weeks). No significant differences were observed in secondary outcomes  
40 29 (tongue coating scores and plaque index).

41 30 **Conclusions** According to the results of this meta-analysis, it seems that probiotics can be used to  
42 31 relieve halitosis in the short term ( $\leq 4$  weeks). The results of bias assessment and limited data might  
43 32 reduce the reliability of the conclusions.

44 33 **Strengths and limitations of this study**

- 45 34 ▶ This study included larger RCTs involved in halitosis and probiotics.  
46 35 ▶ The results were rationally analyzed from the follow-up time perspective.  
47 36 ▶ The included studies had limited patients.  
48 37 ▶ Some studies reported the outcomes with different forms, increasing the heterogeneity of the  
49 38 results.  
50  
51  
52  
53  
54  
55  
56  
57  
58  
59  
60

## 39 INTRODUCTION

40 Halitosis, also known as “oral malodor,” is typically defined as an unpleasant odor emanating from  
41 the oral cavity.<sup>1</sup> As a cause of patients’ referral to the dentist, halitosis is the third most common  
42 disease, only ranking behind dental caries and periodontal disease.<sup>2</sup> According to an epidemiological  
43 study, the prevalence of halitosis is approximately 27.5% in the Chinese population.<sup>3</sup> People have a  
44 higher demand for social interactions and attach more importance to their personal image in today’s  
45 society. Halitosis has a significant impact on both patients’ daily work and social activities and may  
46 even results in frequent psychological problems such as anxiety, depression, and social isolation.<sup>4</sup>  
47 Clinically, halitosis is categorized into genuine halitosis, pseudo-halitosis, and halitophobia.<sup>5</sup> The  
48 latter two types are related to psychological conditions. Only genuine halitosis is caused by  
49 pathological and physiological factors. It includes intraoral halitosis (IOH) and extraoral halitosis,  
50 with the former accounting for 80-90% of the cases.<sup>6</sup>

51 The main etiologic factor of genuine halitosis is the volatile sulfur compounds (VSCs) produced by  
52 oral bacteria via complex microbe–substrate and microbe–microbe interactions and putrefaction of  
53 organic substrates in the oral cavity, associated with poor oral hygiene, tongue coating, and  
54 periodontal disease.<sup>7-10</sup> In particular, hydrogen sulfide (H<sub>2</sub>S), methyl mercaptan (CH<sub>3</sub>SH), and  
55 dimethyl sulphide (C<sub>2</sub>H<sub>6</sub>S) are considered significant parameters and markers of halitosis.<sup>11</sup> Some  
56 microorganisms, such as *Fusobacterium. nucleatum*, *Porphyromonas. gingivalis*, *Prevotella.*  
57 *intermedia*, *Prevotella. nigrescens*, and *Treponema. denticola* not only do participate in periodontal  
58 diseases, but they also may facilitate the production of VSC metabolism.<sup>12</sup> Some studies using 16S  
59 rRNA amplicon sequencing and GC–MS-based metabolite profiling found that the bacterial  
60 composition, diversity and metabolites of the halitosis group were different from those of the control  
61 group.<sup>13,14</sup> Therefore, anaerobic microbiota might play an important role in the development of  
62 halitosis. Consequently, regulating the balance of the oral microbiome to reduce VSC levels is an  
63 important method to treat oral malodor.

64 According to some previous reports, the current treatments for halitosis include mechanical  
65 cleaning (scaling and tongue scraping) and chemical therapy (antibiotics, mouthwashes, and other  
66 agents).<sup>15,16</sup> However, mechanical therapy is often uncomfortable, even if carried out by the dentist. In  
67 addition, although chemical therapy is generally effective for a short time, it is always associated with  
68 various side effects, including the emergence of dysbacteriosis and staining of the tongue and tooth.<sup>17-</sup>  
69 <sup>20</sup> Consequently, new methods with fewer side-effect are constantly suggested to inhibit oral malodor.

70 As live microorganisms, probiotics confer benefits for the host when administered in appropriate  
71 amounts.<sup>21</sup> The beneficial effects of these probiotics are primarily related to regulating the local  
72 microenvironment.<sup>22,23</sup> Recently, probiotics have been widely used in the oral field.<sup>24</sup> There is a growing  
73 body of evidence that the administration of probiotics might affect the composition of oral biofilms. They  
74 have also been investigated in the treatment of periodontal <sup>25,26</sup> and peri-implant diseases <sup>27,28</sup>, caries <sup>29</sup>,  
75 and oral candidiasis.<sup>30,31</sup> Meanwhile, probiotics have also been reported as an alternative strategy to  
76 relieve oral malodor.<sup>32-36</sup> At present, the most common strains of probiotics in clinical studies are  
77 *Lactobacillus salivarius* and *Bifidobacterium*.<sup>37</sup> To date, numerous articles have reported the  
78 beneficial effects of probiotics on the treatment of halitosis.<sup>38-40</sup> However, a previous systematic  
79 review showed that probiotic therapy for oral malodor is associated with insufficient evidence for its  
80 recommendation.<sup>41</sup> In this review, only three included articles published during 2012-2016 and the  
81 diversity of observation time might affect the reliability and quality of the results. Furthermore,

1  
2  
3 82 several new studies on the efficacy of probiotics in the management of halitosis were published in 2020.  
4 83 Thus, it is necessary to carry out a focused analysis of the therapeutic effects of probiotics in the treatment  
5 84 of halitosis.

6 85 Therefore, this meta-analysis was undertaken to investigate the effect of probiotics on managing  
7 86 halitosis from a time perspective. The results could provide some evidence for the administration of  
8 87 probiotics in this field.

## 11 88 **METHODS**

### 12 89 **Patient and public involvement**

13  
14  
15  
16  
17 90 This is a meta-analysis based on the data in the literature. It is not appropriate to involve patient and the  
18 91 public in our study design and outcome measures.

### 19 92 **Study design**

20  
21  
22  
23 93 This systematic review was based on the recommendations of the Preferred Reporting Items for  
24 94 Systematic Reviews and Meta-Analyses (PRISMA) guidelines and registered in the PROSPERO  
25 95 (CRD42021227504).<sup>42</sup> According to the PICOS principle, the following focused question was  
26 96 structured: What is the clinical efficacy of probiotics in patients with halitosis when compared with  
27 97 placebo treatment? The populations were patients diagnosed with halitosis. The intervention was  
28 98 probiotic therapy, representing the test group. The test group was compared with placebo treatment. The  
29 99 considered outcomes were halitosis parameters and other indexes before and after treatment. All study  
30 100 designs were RCTs.

### 31 101 **Search strategy**

32  
33  
34  
35  
36  
37 102 A critical electronic search was conducted in the bibliographic databases, mainly including PubMed,  
38 103 EMBASE, Web of Science, Cochrane Central Register of Controlled Trials up to and including  
39 104 February 2021 to select the published literature. Additionally, gray literature was searched in the  
40 105 database System for Information on Gray literature in European and Google Scholar. The reference  
41 106 lists of the included articles and some related Chinese journals were also searched manually. There  
42 107 was no language restriction.

43  
44 108 An initial search strategy was conducted in the PubMed with the combination of Medical Subject  
45 109 Headings (Mesh) terms identified by an asterisk symbol (\*) and free text words as the follows:

46 110 Probiotic OR Probiotic\* OR Probiotic therapy OR Probiotic effect OR Probiotic treatment

47 111 AND

48 112 halitosis OR halitosis \* OR malodor OR oral malodor OR malodour OR bad breath OR fetor oris.

49 113 Endnote X7 was used for electronic title management. First, primary screening was performed  
50 114 independently by two reviewers (JJL and NWH) based on the titles and abstracts. Then, the full-text  
51 115 articles were used to assess the eligibility further. Any disagreement was solved by consulting a third  
52 116 reviewer.

## 117 **Inclusion criteria**

118 Studies meeting the following conditions were considered eligible for this review: 1) study types:  
119 randomized controlled clinical trials or randomized controlled cross-over studies; 2) participants:  
120 systemically healthy patients diagnosed with halitosis via accepted standards (the organoleptic score  
121 and or the concentration of volatile sulfur compounds); 3) interventions: evaluating the efficacy of  
122 probiotics with placebo, regardless of the probiotics species and the consumption method; 4) control  
123 interventions: placebo treatment; if the control interventions included other measures, the study was  
124 not included (e.g., studies comparing tongue scraping plus chlorhexidine plus probiotics and tongue  
125 scraping plus chlorhexidine were excluded);<sup>33</sup> 5) clinical data: the measurement values, including  
126 halitosis parameters and other indexes before and after treatment.

## 127 **Risk of bias**

128 The included studies underwent a quality assessment with the Revised Cochrane risk of bias tool for  
129 randomized trials (RoB2).<sup>43</sup> This tool assesses the risk of bias in five domain areas, including  
130 randomization process, deviations from intended interventions, missing outcome data, measurement  
131 of outcome, and selection of the reported result. Each domain assessed bias following several  
132 signaling questions. The overall bias was classified as a high risk of bias, some concerns, or a low of  
133 risk of bias determined by a validated algorithm. After screening the articles, two reviewers (JJL and  
134 NWH) conducted the assessment independently to reach an agreement.

## 135 **Data extraction**

136 Data were extracted with a researcher-designed data form with the following information: 1) basic  
137 information of the included studies (first author's name and the year of publication); 2) study type  
138 (RCT); 3) diagnostic criteria for halitosis; 4) characteristics of the participants (sample volume, the  
139 age range); 5) treatment (probiotic administration, including the type of bacteria, vehicles, doses, and  
140 frequencies); 6) clinical parameters (including the primary and secondary outcomes of final  
141 participants); 7) significance and follow-up periods.

142 Of all these variables, the follow-up periods referred to the duration of probiotic use. If probiotic  
143 treatment ceased during the observation period, only the data before ceasing treatment were included.  
144 Concerning clinical parameters, organoleptic (OLP) scores and VSC concentrations were considered  
145 the primary outcomes, which were directly associated with oral malodor. The secondary outcomes in  
146 this review included tongue coating scores (TCS) and plaque index (PI) because they are commonly  
147 regarded as halitosis causes.

## 148 **Statistical analysis**

149 The statistical analysis was performed with Review Manager 5.3. All the data were group-analyzed  
150 according to the follow-up time. The time  $\leq 4$  weeks was considered the short-term period, and  
151 time  $> 4$  weeks was considered the long-term period. In one study with three observation periods, the  
152 values of 4 weeks were analyzed in the short term to keep consistent with other studies.<sup>44</sup> Study  
153 heterogeneity was evaluated using Q statistics and the  $I^2$  test. P-value  $< 0.10$  was treated as the  
154 standard test. When  $I^2 > 50\%$  or  $p < 0.10$ , there was significant heterogeneity between the studies.

Subgroup or meta-regression was necessary to analyze the sources of heterogeneity. The continuous data on the halitosis parameters of the present studies were expressed with the standardized mean difference (SMD) and 95% CI (confidence interval). A random-effect model was used for analysis. Therefore, the mean difference and standard deviation had to be acquired. If the original text did not provide the related data, the mean difference could be calculated, and the standard deviation was obtained with the formula ( $r_d = \sqrt{r_1^2/n_1 + r_2^2/n_2}$ ). The excel sheets in the articles were used to convert the values when provided with median and interquartile.<sup>45, 46</sup>

## RESULTS

### Study selection

In total, 238 articles were potentially identified by electronic and manual searches. After eliminating the duplicates, 14 articles were included by screening the titles and abstracts. Then, these studies were evaluated by reading the full texts, and seven articles met the final inclusion criteria.<sup>40, 44, 47-51</sup> Figure 1 presents the whole process and reasons for exclusion.

### Study characteristics

Table 1 presents the main characteristics of the included studies. In this review, all the studies were randomized control trials. The number of participants in the studies ranged between 23 and 68, with an age range of 19 to 70. Halitosis was diagnosed with OLP scores and or VSC concentrations. The probiotics and placebo groups were compared, and the follow-up periods varied from two weeks to 12 weeks.

**Table 1** Characteristics of the included studies.

| Study                  | Type                                                        | Halitosis criterion                     | Subjects Age    | Clinical parameters                                                                               | Probiotics Administration (Vehicle, strains and frequency)                                                                                                                        | Follow-up                     |
|------------------------|-------------------------------------------------------------|-----------------------------------------|-----------------|---------------------------------------------------------------------------------------------------|-----------------------------------------------------------------------------------------------------------------------------------------------------------------------------------|-------------------------------|
| Mousquer et al. (2020) | RCT<br>Placebo-double<br>masked, parallel                   | OLP score $\geq$ 1                      | 29<br>$\geq$ 18 | OLP<br>VSC<br>TCS                                                                                 | A gum including 1 billion colony forming units (CFU) Lactobacillus salivarius G60 taken twice per day                                                                             | Baseline<br>2 weeks           |
| Lee et al. (2020)      | RCT<br>Placebo-double<br>blind parallel                     | VSC $\geq$ 1.5ng/10 mL                  | 68<br>20-39     | OLP<br>VSC (H <sub>2</sub> S,<br>CH <sub>3</sub> S, C <sub>2</sub> H <sub>6</sub> S)              | An 800-mg tablet contained 1.0 $\times$ 10 <sup>8</sup> CFU/g Weissella cibaria taken once per day                                                                                | Baseline<br>4 weeks<br>8weeks |
| He et al. (2020)       | RCT<br>Placebo-double<br>blind parallel                     | OLP score $\geq$ 2<br>VSC $\geq$ 150ppb | 28<br>23-44     | OLP<br>VSC<br>TCS<br>PI                                                                           | A tablet containing 1 $\times$ 10 <sup>9</sup> CFU Streptococcus salivarius K12 taken twice per day                                                                               | Baseline<br>4 weeks           |
| Keller et al. (2012)   | RCT<br>Placebo-double<br>blind cross-over                   | OLP score $>$ 1                         | 25<br>19-25     | OLP<br>VSC                                                                                        | A chewing gum containing Lactobacillus reuteri DSM 17938 and Lactobacillus reuteri ATCC PTA 5289 -both with a concentration of 1 $\times$ 10 <sup>8</sup> CFU taken twice per day | Baseline<br>2 weeks           |
| Suzuki et al. (2014)   | RCT<br>Double-blind<br>placebo-<br>controlled<br>Cross-over | OLP score $\geq$ 1.5                    | 23<br>22-67     | OLP<br>VSC (H <sub>2</sub> S,<br>CH <sub>3</sub> S, C <sub>2</sub> H <sub>6</sub> S)<br>PI<br>TCS | A tablet containing 6.7 $\times$ 10 <sup>8</sup> CFU Lactobacillus salivarius WB21 and 280mg xylitol taken 3 times per day                                                        | Baseline<br>2 weeks           |



|    |               |                |                     |       |                                                     |                                             |          |
|----|---------------|----------------|---------------------|-------|-----------------------------------------------------|---------------------------------------------|----------|
| 1  |               |                |                     |       |                                                     |                                             |          |
| 2  |               |                |                     |       |                                                     |                                             |          |
| 3  | Penala et al. | RCT            | OLP score > 2       | 29    | OLP                                                 | A capsule mixture included                  | Baseline |
| 4  | (2016)        | Placebo-double |                     | 25-59 | PI                                                  | Lactobacillus salivarius ( $2 \times 10^9$  | 4 weeks  |
| 5  |               | blind parallel |                     |       |                                                     | CFU) and Lactobacillus reuteri ( $2 \times$ | 12 weeks |
| 6  |               |                |                     |       |                                                     | $10^9$ CFU) dissolved into 10ml             |          |
| 7  |               |                |                     |       |                                                     | distilled water to rinse for 1min,          |          |
| 8  |               |                |                     |       |                                                     | daily twice                                 |          |
| 9  | Kim et al.    | RCT            | OLP score $\geq 2$  | 58    | VSC (H <sub>2</sub> S,                              | A bag of powder mixture included            | Baseline |
| 10 | (2020)        | Placebo-double | VSC $\geq 0.15$ ng/ | 20-70 | CH <sub>3</sub> S, C <sub>2</sub> H <sub>6</sub> S) | Weissella. cibaria CMU ( $1.0 \times 10^8$  | 2 weeks  |
| 11 |               | blind parallel | ml                  |       | OLP                                                 | CFU) melted in the mouth once per           | 4 weeks  |
| 12 |               |                |                     |       |                                                     | day                                         | 8weeks   |

175 \*RCT: randomized controlled trials; OLP: organoleptic; VSC: volatile sulfur compounds; TCS: tongue coating scores; CFU:  
 176 colony forming units; H<sub>2</sub>S: hydrogen sulfide; CH<sub>3</sub>S: methyl mercaptan; C<sub>2</sub>H<sub>6</sub>S: methanliol; PI: plaque index

## 177 Risk of bias

178 The bias estimation results showed that one study had a low risk of bias, one had a high risk, and five  
 179 showed some concerns. The reason for a high risk of bias was the incomplete outcome data of the  
 180 OLP scores. Five articles were identified as some concerns because there were many uncertain factors  
 181 in their full texts. There were only seven studies in our review; thus, a funnel plot was not performed.  
 182 Figure 2 presents the concrete data on the risk of bias.

## 183 Primary outcomes

184 Concerning OLP, all the included studies detected the parameter with the 0-5 organoleptic scale by  
 185 one or two trained and calibrated judges, and five studies contained complete data.<sup>40, 48-51</sup> Studies by  
 186 Keller et al. (2012) and Penala et al. (2016) reported a significant decrease in OLP in the probiotic  
 187 group compared to the placebo group after treatment ( $p < 0.05$ ). In the study by Lee et al. (2020)  
 188 involving different follow-up periods, OLP scores decreased significantly in the test groups at four  
 189 weeks ( $p = 0.002$ ) but not eight weeks ( $p = 0.188$ ) compared to the baseline. Additionally, the results  
 190 of the other four studies indicated that the OLP scores did not differ between the two groups.

191 Concerning VSC, six articles determined VSC concentrations, with three studies detecting the  
 192 values of VSC and subgroups (H<sub>2</sub>S, CH<sub>3</sub>SH, and C<sub>2</sub>H<sub>6</sub>S).<sup>40, 44, 50</sup> According to the results, only two  
 193 studies<sup>40, 50</sup> reported a significant improvement in VSC levels in experimental groups versus placebo  
 194 groups.

## 195 Secondary outcomes

196 Concerning TCS, three studies evaluated the changes between the probiotic and placebo groups at  
 197 four weeks<sup>40, 49, 51</sup>. Although a reduced tendency was observed after treatment compared with baseline  
 198 values, there was no significant difference between the two groups.

199 Concerning PI, in the three studies involved,<sup>40, 48, 49</sup> only one study showed a significant reduction  
 200 in PI in the experimental group compared with the controlled group at 12 weeks.<sup>48</sup>

## 201 Quantitative synthesis

202 A meta-analysis was performed including studies with similar clinical parameters of OLP, VSC, TCS,  
 203 and PI, according to the follow-up time. Although the detection methods of VSC were different, both  
 204 of the devices exhibited similar sensitivity and specificity in the detecting of halitosis.<sup>52</sup> Therefore, we

analyzed these values together. Considering the limitations of the included studies and follow-up time, the pooled estimation of TCS and PI was only performed in the short term.

In the short term, the OLP scores significantly decreased in the probiotic group compared to the control group [SMD = -0.58; 95% CI (-0.87, -0.30),  $p < 0.0001$ ] (Figure 3). A similar result was observed in VSC [SMD = -0.26; 95% CI (-0.51, -0.01),  $p = 0.04$ ] and H<sub>2</sub>S levels [SMD = -0.73; 95% CI (-1.36, -0.10),  $p = 0.02$ ] (Figure 3 and Figure 5). Other items (TCS, PI, CH<sub>3</sub>S, and C<sub>2</sub>H<sub>6</sub>S) were not significantly different between the experimental and control groups. The heterogeneity of each outcome was low ( $I^2 < 50%$ ) except for H<sub>2</sub>S levels ( $I^2 = 75%$ ).

In the long term, there was a significant improvement in OLP scores in the experimental group [SMD = -0.45; 95% CI (-0.85, -0.04),  $p = 0.03$ ] (Figure 4). The results failed to show a significant difference in VSC concentrations and their subgroups levels (Figure 4 and Figure 6). The heterogeneity of VSC concentrations was substantial ( $I^2 = 58%$ ).

## DISCUSSION

Halitosis is a universal phenomenon with a negative impact on people of all ages. Most causes are related to oral health, particularly periodontal diseases and tongue coating.<sup>8, 53</sup> Clinically, organoleptic test and detection of VSC concentrations are two commonly used methods to diagnose and monitor halitosis. Considering VSC generation, the use of probiotics to improve halitosis might be useful by modifying the composition of bacteria. Therefore, this review investigated the efficacy of probiotics in treating halitosis based on symptoms and causes.

This meta-analysis demonstrated that probiotics significantly reduced the OLP scores compared with the placebo group regardless of the duration of observation, confirming the benefits of probiotics for halitosis treatment. The probiotics group exhibited a significant reduction in VSC concentrations in the short term ( $\leq 4$  weeks), with no noticeable difference in the long term ( $> 4$  weeks). Meta-analyses were also performed in the subgroups of H<sub>2</sub>S, CH<sub>3</sub>SH, C<sub>2</sub>H<sub>6</sub>S to assess the concrete difference in VSC levels. The results showed that only H<sub>2</sub>S levels reduced noticeably in the short term when the probiotic treatment was administered. As for TCS and PI, the meta-analysis estimated the difference based on the data of three included studies, whose observation times were all within four weeks. The results showed no significant differences between the experimental and placebo groups.

Concerning primary outcomes, OLP scores reflecting subjective perception were often treated as the gold standard for diagnosing halitosis clinically and in the research.<sup>54, 55</sup> In the present article, six studies included the identified halitosis criteria of subjects with OLP scores.<sup>40, 44, 47-49, 51</sup> The pooled estimation of this value was in favor of probiotic therapy rather than placebo. The VSC concentration measurement is an objective method, usually using a Halimeter or OralChroma with no significant difference. However, compared with organoleptic evaluation, VSC measurement is a quantitative variable with high sensitivity and reproducibility.<sup>56-58</sup> The short-term results of VSC showed a significant improvement in the probiotic group compared to the placebo groups. These findings mean that probiotics might have a potential beneficial effect on relieving oral malodor symptoms in the short term. The possible mechanism is thought to be related to the oral cavity microbiome. According to some previous studies, odorous compounds are derived from the decomposition of amino acids and proteins by anaerobic bacteria.<sup>7, 59</sup> The principle of probiotic therapy is the competitive inhibition of oral anaerobic bacteria to maintain balance. Based on studies on VSC and bacteria, the significantly lower VSC levels in the short term in the probiotic period might indicate the reduced activity of

1  
2  
3 247 anaerobic bacteria. This finding is different from a previous study. One possible reason is the  
4 248 difference in the number of included articles. Besides, the group analysis of the follow-up time might  
5 249 also play a crucial role in assessing the outcomes. Meanwhile, we found that the short-term outcome  
6 250 of H<sub>2</sub>S concentration change other than CH<sub>3</sub>SH, C<sub>2</sub>H<sub>6</sub>S was consistent with the total VSC. This might  
7 251 be attributed to the differences in bacterial number and species related to each VSC reduction and  
8 252 mechanism of probiotics<sup>12, 34, 60</sup>. Additionally, the regular VSCs measurement device was reported to  
9 253 be more sensitive towards H<sub>2</sub>S than CH<sub>3</sub>SH and C<sub>2</sub>H<sub>6</sub>S,<sup>58</sup> which is also a possible reason for the above  
10 254 result. Because lower sensitivity would have a significant effect on the accurate measurement of the  
11 255 relatively low VSC. However, this specific mechanism is not clear and the high heterogeneity of the  
12 256 assessment reduced the reliability of the findings (p=0.04 and I<sup>2</sup>=75%).

13 257 Regarding the secondary outcomes, based on the present meta-analysis, there was no significant  
14 258 difference between the experimental and placebo groups during the observation time. The possible  
15 259 reason was the short observation time in the included studies because one study included in the  
16 260 analysis showed a significant improvement in PI at 12 weeks.<sup>48</sup> Tongue coating and periodontitis are  
17 261 often regarded as the leading causes of halitosis<sup>49, 61</sup>. In the original articles, the TCS and PI showed a  
18 262 pronounced decline after using probiotics compared with the baseline, with no decrease in the placebo  
19 263 group. This phenomenon might be related to the type of probiotics, some of which were reported to  
20 264 boost salivary flow by interacting with the oral microbiome.

21 265 Considering the inconsistency in the results of organoleptic scores and VSC concentrations in the  
22 266 long term, time is likely to be the primary reason due to its significant effect on community diversity.  
23 267 Additionally, it is also associated with the interaction of probiotics and anaerobic bacteria related to  
24 268 VSC. In the present review, four articles used probiotics consisting of *Lactobacillus salivarius* as the  
25 269 intervention treatment, while two articles selected *Weissella cibaria*, a bacterium isolated from  
26 270 *Lactobacillus*, and one article with *Streptococcus*. The bacterial species related to VSC production  
27 271 mainly included *Porphyromonas gingivalis*, *Prevotella intermedia*, *Fusobacterium nucleatum*, and  
28 272 *Treponema denticola*.<sup>53, 62-64</sup> *Lactobacillus salivarius* reduces the production of VSC mainly by  
29 273 inhibiting the growth of *Porphyromonas gingivalis*, *Prevotella intermedia*, and *Fusobacterium*  
30 274 *nucleatum*. However, *Streptococcus* has been reported to inhibit various bacteria, including  
31 275 *Streptococcus mutans*, *Actinomyces naeslundii*, and *Rothia mucilaginosa*.<sup>34</sup> When oral bacteria vary  
32 276 over time, the efficacy of probiotics, especially VSC concentrations, changes based on the number of  
33 277 anaerobic bacteria. Moreover, along with VSCs, various other malodor gases are often present in bad  
34 278 mouth air, such as indoles, skatole, pyridine, picolines and polyamines. The oral microbiota included  
35 279 not only VSCs-producing bacteria, but also other bacteria being able to produce malodor  
36 280 compounds.<sup>65</sup> Therefore, the long-term results may attribute to the inhibition effect of probiotics on  
37 281 other bacteria. Therefore, the data about microorganisms changing in different periods are significant  
38 282 for the evaluation of probiotic effects. However, only three included articles mentioned  
39 283 microorganism detection. The differences in detection methods and bacterial species and insufficient  
40 284 data in the included studies limited the microorganism statistical analysis in this review.

41 285 There were several limitations in the present study throughout the whole review process. First,  
42 286 although both electronic and hand searches were conducted in four primary databases, it was  
43 287 impossible to retrieve all the relevant studies. Second, the number of eligible studies and included  
44 288 subjects was small. Third, the interventions in all the included studies included probiotics, but the  
45 289 strains were different. Moreover, the doses used, frequencies, and administration periods varied  
46 290 greatly. A subgroup analysis was necessary to evaluate the source of efficacy concerning the probiotic

1  
2  
3 291 species, but the small size of the included articles prevented further analysis. All these factors would  
4 292 inevitably affect the accuracy of outcomes. Fourth, the detection methods of VSC were different.  
5 293 Although there is not significant difference between them, the combined analysis might still affect the  
6 294 reliability of the results. Fifth, in some included studies, the primary outcomes were presented in  
7 295 different forms, such as percentages or range inter-quartiles. Finally, some important parameters,  
8 296 including the microorganism species and changes, were not presented completely in some articles.  
9 297 The absence of partial original data or the differences caused by data conversion equally impaired the  
10 298 final results though many methods were tried to reduce the bias.

## 15 299 **CONCLUSION**

18 300 The present systematic review and meta-analysis indicated that probiotics might decrease the severity  
19 301 of halitosis in the short term without eliminating pathogens. Considering the heterogeneity and  
20 302 limitations of the study, more high-quality random clinical trials are required in the future to verify the  
21 303 results.

## 24 304 **Contributors**

27 305 JJL collected and analyzed data, and drafted the manuscript; NWH and XHQ helped the literature  
28 306 searching and statistical analysis; YZW and CZW provided help in the literature searching and figure  
29 307 revises; XHQ and YKL critically reviewed the manuscript. LJL designed the experiment and critically  
30 308 reviewed the manuscript; All authors agree to be accountable for the study.

## 33 309 **Declaration of competing Interest**

36 310 The authors declare no conflict of interest

## 39 311 **Ethics approval statement**

42 312 This study does not involve human participants.

## 44 313 **Funding**

47 314 This work was supported by the National Natural Science Foundation of China, China (Grant No.  
48 315 81972538)

## 51 316 **Data availability statement**

54 317 The data supporting the findings of this study are available from the corresponding author, Longjiang  
55 318 Li, upon reasonable request.

56 319

320 **References**

- 321 1 Porter SR, Scully C Oral malodour (halitosis). *BMJ* 2006;333:632-635.
- 322 2 Rayman S, Almas K Halitosis among racially diverse populations: An update. *Int J Dent Hyg* 2008;6:2-7.
- 323 3 Liu XN, Shinada K, Chen XC, *et al.* Oral malodor-related parameters in the Chinese general population. *J*  
324 *Clin Periodontol* 2006;33:31-36.
- 325 4 Sanz M, Roldan S, Herrera D Fundamentals of breath malodour. *J Contemp Dent Pract* 2001;2:1-17.
- 326 5 Yaegaki K, Coil JM Examination, classification, and treatment of halitosis; Clinical perspectives. *J Can*  
327 *Dent Assoc* 2000;66:257-261.
- 328 6 Madhushankari GS, Yamunadevi A, Selvamani M, *et al.* Halitosis - an overview: Part-I - Classification,  
329 etiology, and pathophysiology of halitosis. *J Pharm Bioallied Sci* 2015;7:S339-S343.
- 330 7 Scully C, Porter S, Greenman J What to do about halitosis. *BMJ* 1994;308:217-218.
- 331 8 Silva MF, Cademartori MG, Leite F, *et al.* Is periodontitis associated with halitosis? A systematic review  
332 and meta-regression analysis. *J Clin Periodontol* 2017;44:1003-1009.
- 333 9 Quirynen M, Dadamio J, Van den Velde S, *et al.* Characteristics of 2000 patients who visited a halitosis  
334 clinic. *J Clin Periodontol* 2009;36:970-975.
- 335 10 Stephen AS, Dhadwal N, Nagala V, *et al.* Interdental and subgingival microbiota may affect the tongue  
336 microbial ecology and oral malodour in health, gingivitis and periodontitis. *J Periodontal Res* 2021.
- 337 11 Tonzetich J Production and origin of oral malodor: A review of mechanisms and methods of analysis. *J*  
338 *Periodontol* 1977;48:13-20.
- 339 12 Foo LH, Balan P, Pang LM, *et al.* Role of the oral microbiome, metabolic pathways, and novel diagnostic  
340 tools in intra-oral halitosis: A comprehensive update. *Crit Rev Microbiol* 2021;47:359-375.
- 341 13 Ye W, Zhang Y, He M, *et al.* Relationship of tongue coating microbiome on volatile sulfur compounds in  
342 healthy and halitosis adults. *J Breath Res* 2019;14:16005.
- 343 14 Jo JK, Seo SH, Park SE, *et al.* Identification of salivary microorganisms and metabolites associated with  
344 halitosis. *Metabolites* 2021;11.
- 345 15 Loesche WJ, Kazor C Microbiology and treatment of halitosis. *Periodontol 2000* 2002;28:256-279.
- 346 16 Pham TA, Ueno M, Zaitse T, *et al.* Clinical trial of oral malodor treatment in patients with periodontal  
347 diseases. *J Periodontal Res* 2011;46:722-729.
- 348 17 Costalonga M, Herzberg MC The oral microbiome and the immunobiology of periodontal disease and  
349 caries. *Immunol Lett* 2014;162:22-38.
- 350 18 Fedorowicz Z, Aljufairi H, Nasser M, *et al.* Mouthrinses for the treatment of halitosis. *Cochrane Database*  
351 *Syst Rev* 2008:D6701.
- 352 19 Scully C, Greenman J Halitology (breath odour: Aetiopathogenesis and management). *Oral Dis*  
353 2012;18:333-345.
- 354 20 van Steenberghe D, Avontrodt P, Peeters W, *et al.* Effect of different mouthrinses on morning breath. *J*  
355 *Periodontol* 2001;72:1183-1191.
- 356 21 Guarner F, Perdigon G, Corthier G, *et al.* Should yoghurt cultures be considered probiotic? *Br J Nutr*  
357 2005;93:783-786.
- 358 22 Cosseu C, Devine DA, Dullaghan E, *et al.* The commensal *Streptococcus salivarius* K12 downregulates  
359 the innate immune responses of human epithelial cells and promotes host-microbe homeostasis. *Infect Immun*  
360 2008;76:4163-4175.
- 361 23 Devine DA, Marsh PD Prospects for the development of probiotics and prebiotics for oral applications. *J*  
362 *Oral Microbiol* 2009;1.

- 1  
2  
3 363 24 Gungor OE, Kirzioglu Z, Kivanc M Probiotics: Can they be used to improve oral health? *Benef Microbes*  
4 364 2015;6:647-656.
- 5  
6 365 25 Vicario M, Santos A, Violant D, *et al.* Clinical changes in periodontal subjects with the probiotic  
7 366 *Lactobacillus reuteri* Prodentis: A preliminary randomized clinical trial. *Acta Odontol Scand* 2013;71:813-819.
- 8  
9 367 26 Vivekananda MR, Vandana KL, Bhat KG Effect of the probiotic *Lactobacilli reuteri* (Prodentis) in the  
10 368 management of periodontal disease: A preliminary randomized clinical trial. *J Oral Microbiol* 2010;2.
- 11  
12 369 27 Flichy-Fernandez AJ, Ata-Ali J, Alegre-Domingo T, *et al.* The effect of orally administered probiotic  
13 370 *Lactobacillus reuteri*-containing tablets in peri-implant mucositis: A double-blind randomized controlled trial. *J*  
14 371 *Periodontal Res* 2015;50:775-785.
- 15  
16 372 28 Alqahtani F, AlShaikh M, Mehmood A, *et al.* Efficacy of antibiotic versus probiotics as adjuncts to  
17 373 mechanical debridement for managing peri-implant mucositis. *J Oral Implantol* 2021.
- 18  
19 374 29 Laleman I, Detaillleur V, Slot DE, *et al.* Probiotics reduce mutans streptococci counts in humans: A  
20 375 systematic review and meta-analysis. *Clin Oral Investig* 2014;18:1539-1552.
- 21  
22 376 30 Mendonca FH, Santos SS, Faria IS, *et al.* Effects of probiotic bacteria on *Candida* presence and IgA anti-  
23 377 *Candida* in the oral cavity of elderly. *Braz Dent J* 2012;23:534-538.
- 24  
25 378 31 Li D, Li Q, Liu C, *et al.* Efficacy and safety of probiotics in the treatment of *Candida*-associated stomatitis.  
26 379 *Mycoses* 2014;57:141-146.
- 27  
28 380 32 Burton JP, Chilcott CN, Moore CJ, *et al.* A preliminary study of the effect of probiotic *Streptococcus*  
29 381 *salivarius* K12 on oral malodour parameters. *J Appl Microbiol* 2006;100:754-764.
- 30  
31 382 33 Jamali Z, Aminabadi NA, Samiei M, *et al.* Impact of chlorhexidine pretreatment followed by probiotic  
32 383 *streptococcus salivarius* strain k12 on halitosis in children: A randomised controlled clinical trial. *Oral Health*  
33 384 *Prev Dent* 2016;14:305-313.
- 34  
35 385 34 Benic GZ, Farella M, Morgan XC, *et al.* Oral probiotics reduce halitosis in patients wearing orthodontic  
36 386 braces: A randomized, triple-blind, placebo-controlled trial. *J Breath Res* 2019;13:36010.
- 37  
38 387 35 Gurpinar B, Yildirim G, Kumral TL, *et al.* A simple method to reduce halitosis; Tongue scraping with  
39 388 probiotics. *J Breath Res* 2019;14:16008.
- 40  
41 389 36 Yoo HJ, Jwa SK, Kim DH, *et al.* Inhibitory effect of *Streptococcus salivarius* K12 and M18 on halitosis in  
42 390 vitro. *Clin Exp Dent Res* 2020;6:207-214.
- 43  
44 391 37 Allaker RP, Stephen AS Use of probiotics and oral health. *Curr Oral Health Rep* 2017;4:309-318.
- 45  
46 392 38 Henker J, Schuster F, Nissler K Successful treatment of gut-caused halitosis with a suspension of living  
47 393 non-pathogenic *Escherichia coli* bacteria--a case report. *Eur J Pediatr* 2001;160:592-594.
- 48  
49 394 39 Masdea L, Kulik EM, Hauser-Gerspach I, *et al.* Antimicrobial activity of *Streptococcus salivarius* K12 on  
50 395 bacteria involved in oral malodour. *Arch Oral Biol* 2012;57:1041-1047.
- 51  
52 396 40 Suzuki N, Yoneda M, Tanabe K, *et al.* *Lactobacillus salivarius* WB21 - containing tablets for the treatment  
53 397 of oral malodor: A double-blind, randomized, placebo-controlled crossover trial. *Oral Surgery, Oral Medicine,*  
54 398 *Oral Pathology and Oral Radiology* 2014;117:462-470.
- 55  
56 399 41 Yoo JI, Shin IS, Jeon JG, *et al.* The effect of probiotics on halitosis: A systematic review and meta-analysis.  
57 400 *Probiotics Antimicrob Proteins* 2019;11:150-157.
- 58  
59 401 42 Moher D, Liberati A, Tetzlaff J, *et al.* Preferred reporting items for systematic reviews and meta-analyses:  
60 402 The PRISMA statement. *BMJ* 2009;339:b2535.
- 403 43 Sterne J, Savovic J, Page MJ, *et al.* RoB 2: A revised tool for assessing risk of bias in randomised trials.  
404 *BMJ* 2019;366:14898.
- 405 44 Kim D, Kang M, Yeu J, *et al.* Inhibitory effect of the probiotic bacteria, *Weissella cibaria* CMU on  
406 halitosis: A randomized placebo-controlled study. *Journal of Korean Academy of Oral Health* 2020;44:246-252.

- 1  
2  
3 407 45 Wan X, Wang W, Liu J, *et al.* Estimating the sample mean and standard deviation from the sample size,  
4 408 median, range and/or interquartile range. *Bmc Med Res Methodol* 2014;14:135.
- 5 409 46 Luo D, Wan X, Liu J, *et al.* Optimally estimating the sample mean from the sample size, median, mid-  
6 410 range, and/or mid-quartile range. *Stat Methods Med Res* 2018;27:1785-1805.
- 7 411 47 Keller MK, Bardow A, Jensdottir T, *et al.* Effect of chewing gums containing the probiotic bacterium  
8 412 *Lactobacillus reuteri* on oral malodour. *Acta Odontol Scand* 2012;70:246-250.
- 9 413 48 Penala S, Kalakonda B, Pathakota K, *et al.* Efficacy of local use of probiotics as an adjunct to scaling and  
10 414 root planing in chronic periodontitis and halitosis: A randomized controlled trial. *Journal of Research in*  
11 415 *Pharmacy Practice* 2016;5:86.
- 12 416 49 He L, Yang H, Chen Z, *et al.* The Effect of *Streptococcus salivarius* K12 on Halitosis: A Double-Blind,  
13 417 Randomized, Placebo-Controlled Trial. *Probiotics Antimicro* 2020;12:1321-1329.
- 14 418 50 Lee DS, Lee SA, Kim M, *et al.* Reduction of halitosis by a tablet containing *Weissella cibaria* CMU: A  
15 419 randomized, Double-Blind, Placebo-Controlled study. *J Med Food* 2020;23:649-657.
- 16 420 51 Mousquer CR, Della BA, Milani DC, *et al.* Are *Lactobacillus salivarius* G60 and inulin more efficacious to  
17 421 treat patients with oral halitosis and tongue coating than the probiotic alone and placebo? A randomized clinical  
18 422 trial. *J Periodontol* 2020;91:775-783.
- 19 423 52 Vandekerckhove B, Van den Velde S, De Smit M, *et al.* Clinical reliability of non-organoleptic oral  
20 424 malodour measurements. *J Clin Periodontol* 2009;36:964-969.
- 21 425 53 Seerangaiyan K, Juch F, Winkel EG Tongue coating: Its characteristics and role in intra-oral halitosis and  
22 426 general health-a review. *J Breath Res* 2018;12:34001.
- 23 427 54 Bollen CM, Beikler T Halitosis: The multidisciplinary approach. *Int J Oral Sci* 2012;4:55-63.
- 24 428 55 Erovic AS, Lingstrom P, Winkel E, *et al.* Comparison of different treatment modalities for oral halitosis.  
25 429 *Acta Odontol Scand* 2012;70:224-233.
- 26 430 56 Rosenberg M, Kulkarni GV, Bosa A, *et al.* Reproducibility and sensitivity of oral malodor measurements  
27 431 with a portable sulphide monitor. *J Dent Res* 1991;70:1436-1440.
- 28 432 57 Seemann R, Duarte DCM, Filippi A, *et al.* [Halitosis management by the general dental practitioner-  
29 433 results of an International Consensus Workshop\*]. *Swiss Dent J* 2014;124:1205-1211.
- 30 434 58 Rosenberg M, Septon I, Eli I, *et al.* Halitosis measurement by an industrial sulphide monitor. *J Periodontol*  
31 435 1991;62:487-489.
- 32 436 59 Suzuki N, Yoneda M, Takeshita T, *et al.* Induction and inhibition of oral malodor. *Mol Oral Microbiol*  
33 437 2019;34:85-96.
- 34 438 60 Kleinberg I, Westbay G Oral malodor. *Crit Rev Oral Biol Med* 1990;1:247-259.
- 35 439 61 Iatropoulos A, Panis V, Mela E, *et al.* Changes of volatile sulphur compounds during therapy of a case  
36 440 series of patients with chronic periodontitis and halitosis. *J Clin Periodontol* 2016;43:359-365.
- 37 441 62 Iwamoto T, Suzuki N, Tanabe K, *et al.* Effects of probiotic *Lactobacillus salivarius* WB21 on halitosis and  
38 442 oral health: An open-label pilot trial. *Oral Surg Oral Med Oral Pathol Oral Radiol Endod* 2010;110:201-208.
- 39 443 63 Yang F, Huang S, He T, *et al.* Microbial basis of oral malodor development in humans. *J Dent Res*  
40 444 2013;92:1106-1112.
- 41 445 64 Kang MS, Kim BG, Chung J, *et al.* Inhibitory effect of *Weissella cibaria* isolates on the production of  
42 446 volatile sulphur compounds. *J Clin Periodontol* 2006;33:226-232.
- 43 447 65 Takeshita T, Suzuki N, Nakano Y, *et al.* Discrimination of the oral microbiota associated with high  
44 448 hydrogen sulfide and methyl mercaptan production. *Sci Rep-Uk* 2012;2.  
45 449

1  
2  
3 450 **Figure legends**  
4  
5

6 451 Figure 1: Flow diagram of literature search and inclusion.

7 452 Figure 2: Quality assessment of the selected studies (the Revised Cochrane risk of bias tool for  
8 453 randomized trials (RoB2)). Green represents low risk of bias, yellow represents some concerns and  
9 454 red represent high risk of bias.

10 455 Figure 3: Forest plot of halitosis parameters in short-term ( $\leq 4$  weeks): (A) OLP scores; (B) VSC  
11 456 concentrations; (C) TCS; (D) PI.

12 457 Figure 4: Forest plot of halitosis parameters in long-term ( $>4$  weeks): (A) OLP scores; (B) VSC  
13 458 concentrations.

14 459 Figure 5: Forest plot of VSC subgroups in short-term ( $\leq 4$  weeks): (A)  $\text{H}_2\text{S}$ ; (B)  $\text{CH}_3\text{S}$ ; (C)  $\text{C}_2\text{H}_6\text{S}$ .

15 460 Figure 6: Forest plot of VSC subgroups in long-term ( $>4$  weeks): (A)  $\text{H}_2\text{S}$ ; (B)  $\text{CH}_3\text{S}$ ; (C)  $\text{C}_2\text{H}_6\text{S}$ .



1  
2  
3  
4  
5  
6  
7  
8  
9  
10  
11  
12  
13  
14  
15  
16  
17  
18  
19  
20  
21  
22  
23  
24  
25  
26  
27  
28  
29  
30  
31  
32  
33  
34  
35  
36  
37  
38  
39  
40  
41  
42  
43  
44  
45  
46  
47  
48  
49  
50  
51  
52  
53  
54  
55  
56  
57  
58  
59  
60

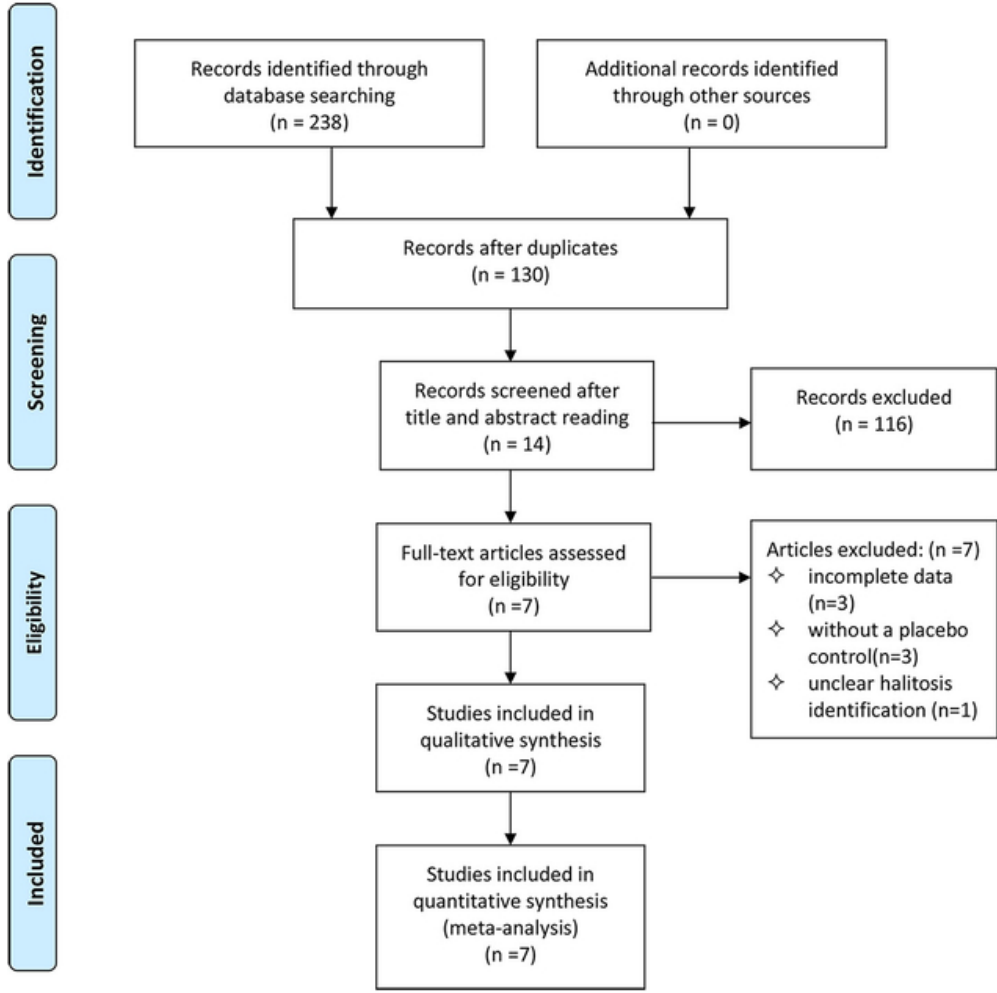

Flow diagram of literature search and inclusion.

54x58mm (300 x 300 DPI)

| Intention-to-treat | Unique ID | Study ID       | Experimental | Comparator | Outcome              | Weight | D1 | D2 | D3 | D4 | D5 | Overall |
|--------------------|-----------|----------------|--------------|------------|----------------------|--------|----|----|----|----|----|---------|
|                    | 1         | He 2020        | probiotic    | placebo    | halitosis parameters | 1      | +  | !  | +  | +  | !  | !       |
|                    | 2         | Keller 2012    | probiotic    | placebo    | halitosis parameters | 1      | +  | !  | !  | +  | +  | !       |
|                    | 3         | Kim 2020       | probiotic    | placebo    | halitosis parameters | 1      | +  | !  | +  | +  | +  | !       |
|                    | 4         | Lee 2020       | probiotic    | placebo    | halitosis parameters | 1      | +  | !  | +  | +  | +  | !       |
|                    | 5         | Moussaqer 2020 | probiotic    | placebo    | halitosis parameters | 1      | +  | +  | +  | +  | +  | +       |
|                    | 6         | Penala 2016    | probiotic    | placebo    | halitosis parameters | 1      | +  | !  | +  | +  | +  | !       |
|                    | 7         | Suzuki 2014    | probiotic    | placebo    | halitosis parameters | 1      | +  | !  | +  | +  | +  | !       |

+ Low risk  
! Some concerns  
! High risk

D1 Randomisation process  
 D2 Deviations from the intended interventions  
 D3 Missing outcome data  
 D4 Measurement of the outcome  
 D5 Selection of the reported result

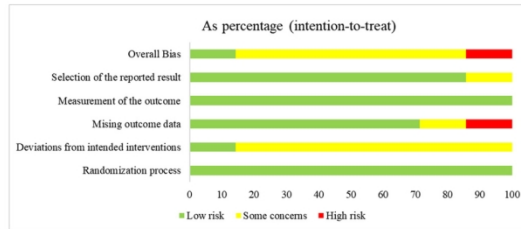

Quality assessment of the selected studies (the Revised Cochrane risk of bias tool for randomized trials (RoB2)). Green represents low risk of bias, yellow represents some concerns and red represent high risk of bias.

166x93mm (300 x 300 DPI)

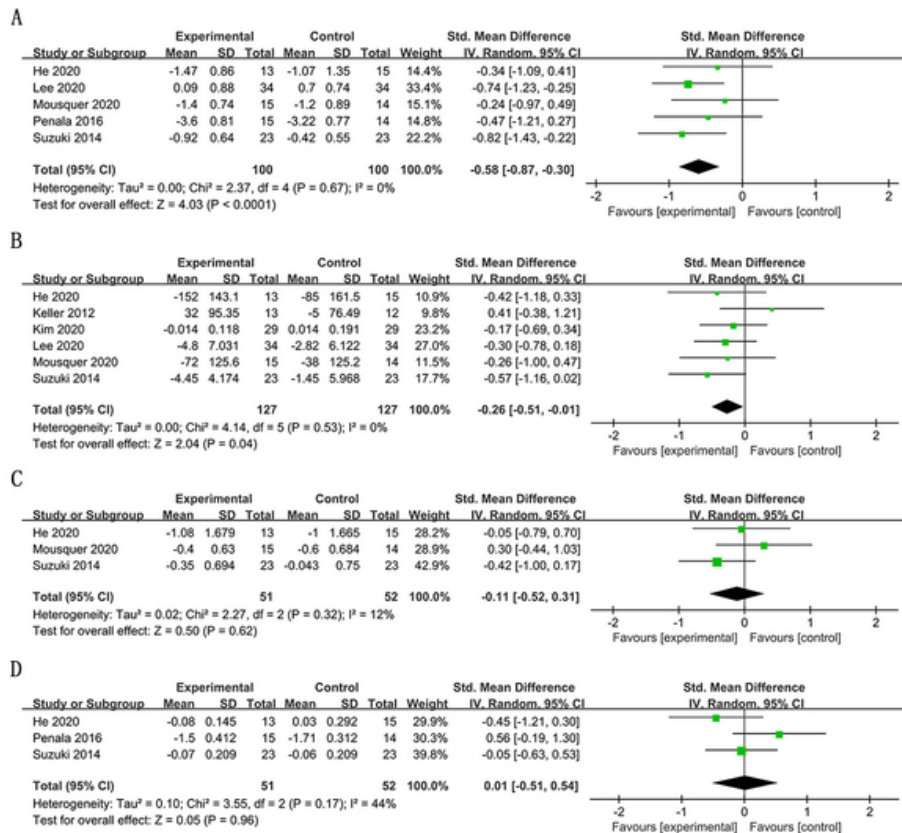

Forest plot of halitosis parameters in short-term ( $\leq 4$  weeks): (A) OLP scores; (B) VSC concentrations; (C) TCS; (D) PI.

53x48mm (300 x 300 DPI)

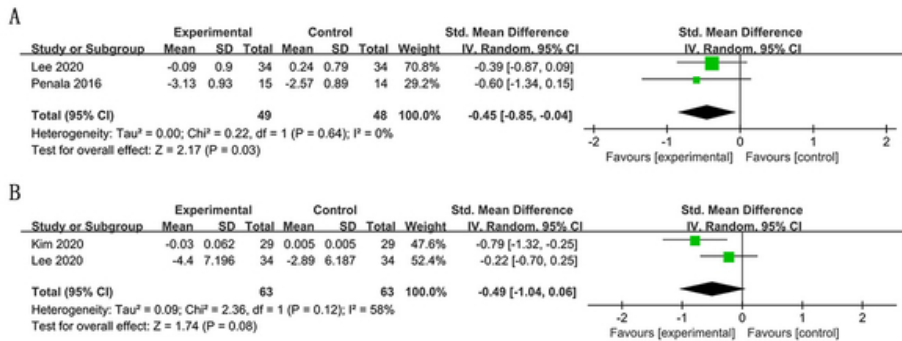

Forest plot of halitosis parameters in long-term (>4 weeks): (A) OLP scores; (B) VSC concentrations.

54x22mm (300 x 300 DPI)

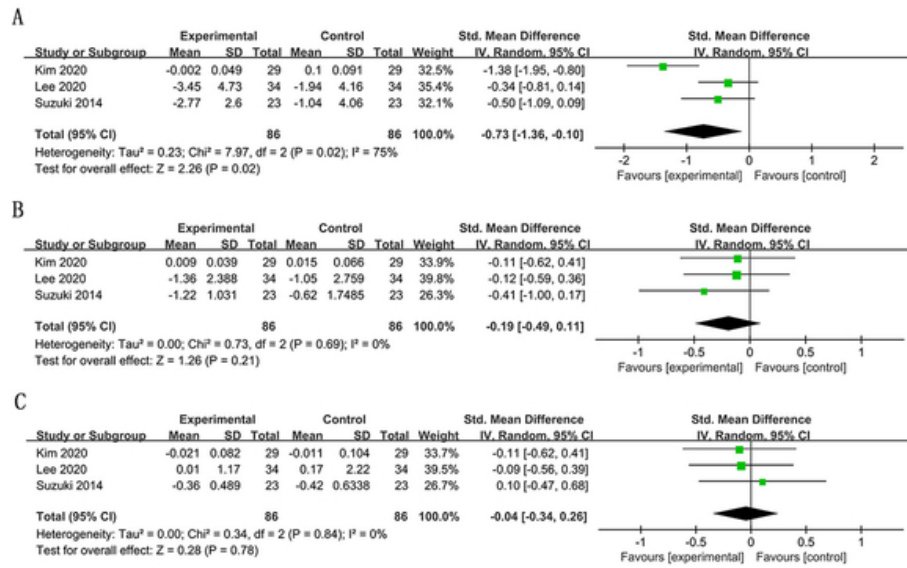

Forest plot of VSC subgroups in short-term ( $\leq 4$  weeks): (A) H<sub>2</sub>S; (B) CH<sub>3</sub>S; (C) C<sub>2</sub>H<sub>6</sub>S.

53x36mm (300 x 300 DPI)

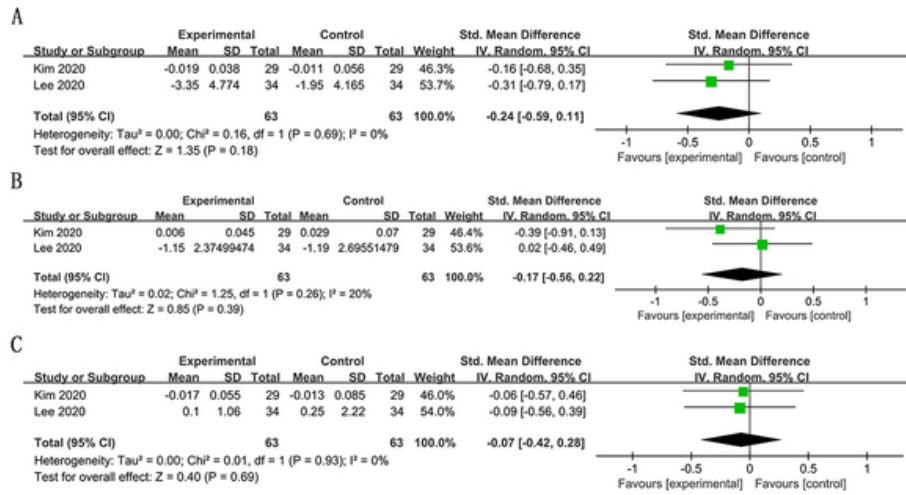

Forest plot of VSC subgroups in long-term (>4 weeks): (A) H2S; (B) CH3S; (C) C2H6S.

53x30mm (300 x 300 DPI)

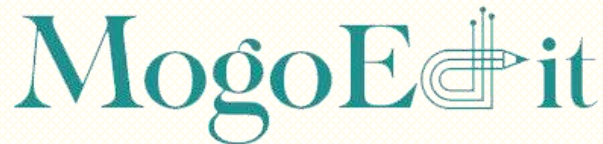

## CERTIFICATE OF ENGLISH EDITING

This is to certify that the manuscript entitled  
***The efficacy of probiotics in the management of halitosis: A systematic review and meta-analysis***  
commissioned to us has been carefully edited by a native English-speaking editor of MogoEdit, and the grammar, spelling, and punctuation have been verified and corrected where needed. Based on this review, we believe that the language in this paper meets academic journal requirements. Please contact us with any questions.

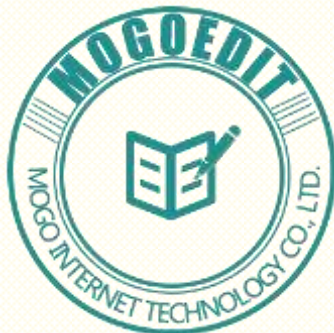

*Gang Zhang*

Dr. Gang Zhang  
Founder & CEO of MogoEdit

Date of Issue  
November 9, 2021

**Disclaimer:** The changes in the document may be accepted or rejected by the authors in their sole discretion after our editing. However, MogoEdit is not responsible for revisions made to the document after our edit on **November 9, 2021**.

MogoEdit is a professional English editing company who provides English language editing, translation, and publication support services to individuals and corporate customers worldwide. As a company invested by the affiliate fund of Chinese Academy of Science, MogoEdit is one of the leading language editing service providers in China, whose clients come from more than 1000 universities and research institutes.

MogoEdit Website: <http://en.mogoedit.com/>

500+ native English editors: <http://en.mogoedit.com/editors>

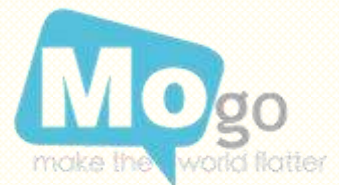

Mogo Internet Technology Co., LTD.

No. 57, 3rd Keji Road, Xi'an 710075, PR China +86 02988317483

[support@mogoedit.com](mailto:support@mogoedit.com)

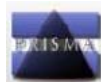

## PRISMA 2020 Checklist

| Section and Topic             | Item # | Checklist item                                                                                                                                                                                                                                                                                       | Location where item is reported |
|-------------------------------|--------|------------------------------------------------------------------------------------------------------------------------------------------------------------------------------------------------------------------------------------------------------------------------------------------------------|---------------------------------|
| <b>TITLE</b>                  |        |                                                                                                                                                                                                                                                                                                      |                                 |
| Title                         | 1      | Identify the report as a systematic review.                                                                                                                                                                                                                                                          | 1                               |
| <b>ABSTRACT</b>               |        |                                                                                                                                                                                                                                                                                                      |                                 |
| Abstract                      | 2      | See the PRISMA 2020 for Abstracts checklist.                                                                                                                                                                                                                                                         | 2                               |
| <b>INTRODUCTION</b>           |        |                                                                                                                                                                                                                                                                                                      |                                 |
| Rationale                     | 3      | Describe the rationale for the review in the context of existing knowledge.                                                                                                                                                                                                                          | 2,3                             |
| Objectives                    | 4      | Provide an explicit statement of the objective(s) or question(s) the review addresses.                                                                                                                                                                                                               | 3                               |
| <b>METHODS</b>                |        |                                                                                                                                                                                                                                                                                                      |                                 |
| Eligibility criteria          | 5      | Specify the inclusion and exclusion criteria for the review and how studies were grouped for the syntheses.                                                                                                                                                                                          | 4                               |
| Information sources           | 6      | Specify all databases, registers, websites, organisations, reference lists and other sources searched or consulted to identify studies. Specify the date when each source was last searched or consulted.                                                                                            | 3                               |
| Search strategy               | 7      | Present the full search strategies for all databases, registers and websites, including any filters and limits used.                                                                                                                                                                                 | 3                               |
| Selection process             | 8      | Specify the methods used to decide whether a study met the inclusion criteria of the review, including how many reviewers screened each record and each report retrieved, whether they worked independently, and if applicable, details of automation tools used in the process.                     | 4                               |
| Data collection process       | 9      | Specify the methods used to collect data from reports, including how many reviewers collected data from each report, whether they worked independently, any processes for obtaining or confirming data from study investigators, and if applicable, details of automation tools used in the process. | 4                               |
| Data items                    | 10a    | List and define all outcomes for which data were sought. Specify whether all results that were compatible with each outcome domain in each study were sought (e.g. for all measures, time points, analyses), and if not, the methods used to decide which results to collect.                        | 4                               |
|                               | 10b    | List and define all other variables for which data were sought (e.g. participant and intervention characteristics, funding sources). Describe any assumptions made about any missing or unclear information.                                                                                         | 4                               |
| Study risk of bias assessment | 11     | Specify the methods used to assess risk of bias in the included studies, including details of the tool(s) used, how many reviewers assessed each study and whether they worked independently, and if applicable, details of automation tools used in the process.                                    | 4                               |
| Effect measures               | 12     | Specify for each outcome the effect measure(s) (e.g. risk ratio, mean difference) used in the synthesis or presentation of results.                                                                                                                                                                  | 4                               |
| Synthesis methods             | 13a    | Describe the processes used to decide which studies were eligible for each synthesis (e.g. tabulating the study intervention characteristics and comparing against the planned groups for each synthesis (item #5)).                                                                                 | 4                               |
|                               | 13b    | Describe any methods required to prepare the data for presentation or synthesis, such as handling of missing summary statistics, or data conversions.                                                                                                                                                | 4                               |
|                               | 13c    | Describe any methods used to tabulate or visually display results of individual studies and syntheses.                                                                                                                                                                                               | 4                               |
|                               | 13d    | Describe any methods used to synthesize results and provide a rationale for the choice(s). If meta-analysis was performed, describe the model(s), method(s) to identify the presence and extent of statistical heterogeneity, and software package(s) used.                                          | 4                               |
|                               | 13e    | Describe any methods used to explore possible causes of heterogeneity among study results (e.g. subgroup analysis, meta-regression).                                                                                                                                                                 | 4                               |
|                               | 13f    | Describe any sensitivity analyses conducted to assess robustness of the synthesized results.                                                                                                                                                                                                         | 4                               |
| Reporting bias assessment     | 14     | Describe any methods used to assess risk of bias due to missing results in a synthesis (arising from reporting biases).                                                                                                                                                                              | 5                               |
| Certainty assessment          | 15     | Describe any methods used to assess certainty (or confidence) in the body of evidence for an outcome.                                                                                                                                                                                                | 5                               |



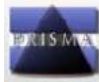

## PRISMA 2020 Checklist

| Section and Topic                              | Item # | Checklist item                                                                                                                                                                                                                                                                       | Location where item is reported |
|------------------------------------------------|--------|--------------------------------------------------------------------------------------------------------------------------------------------------------------------------------------------------------------------------------------------------------------------------------------|---------------------------------|
| <b>RESULTS</b>                                 |        |                                                                                                                                                                                                                                                                                      |                                 |
| Study selection                                | 16a    | Describe the results of the search and selection process, from the number of records identified in the search to the number of studies included in the review, ideally using a flow diagram.                                                                                         | 5                               |
|                                                | 16b    | Cite studies that might appear to meet the inclusion criteria, but which were excluded, and explain why they were excluded.                                                                                                                                                          | 5                               |
| Study characteristics                          | 17     | Cite each included study and present its characteristics.                                                                                                                                                                                                                            | 5                               |
| Risk of bias in studies                        | 18     | Present assessments of risk of bias for each included study.                                                                                                                                                                                                                         | 5                               |
| Results of individual studies                  | 19     | For all outcomes, present, for each study: (a) summary statistics for each group (where appropriate) and (b) an effect estimate and its precision (e.g. confidence/credible interval), ideally using structured tables or plots.                                                     | 5                               |
| Results of syntheses                           | 20a    | For each synthesis, briefly summarise the characteristics and risk of bias among contributing studies.                                                                                                                                                                               | 6                               |
|                                                | 20b    | Present results of all statistical syntheses conducted. If meta-analysis was done, present for each the summary estimate and its precision (e.g. confidence/credible interval) and measures of statistical heterogeneity. If comparing groups, describe the direction of the effect. | 6                               |
|                                                | 20c    | Present results of all investigations of possible causes of heterogeneity among study results.                                                                                                                                                                                       | 6                               |
|                                                | 20d    | Present results of all sensitivity analyses conducted to assess the robustness of the synthesized results.                                                                                                                                                                           | 6                               |
| Reporting biases                               | 21     | Present assessments of risk of bias due to missing results (arising from reporting biases) for each synthesis assessed.                                                                                                                                                              | 6                               |
| Certainty of evidence                          | 22     | Present assessments of certainty (or confidence) in the body of evidence for each outcome assessed.                                                                                                                                                                                  | 6                               |
| <b>DISCUSSION</b>                              |        |                                                                                                                                                                                                                                                                                      |                                 |
| Discussion                                     | 23a    | Provide a general interpretation of the results in the context of other evidence.                                                                                                                                                                                                    | 7                               |
|                                                | 23b    | Discuss any limitations of the evidence included in the review.                                                                                                                                                                                                                      | 7,8                             |
|                                                | 23c    | Discuss any limitations of the review processes used.                                                                                                                                                                                                                                | 7,8                             |
|                                                | 23d    | Discuss implications of the results for practice, policy, and future research.                                                                                                                                                                                                       | 8                               |
| <b>OTHER INFORMATION</b>                       |        |                                                                                                                                                                                                                                                                                      |                                 |
| Registration and protocol                      | 24a    | Provide registration information for the review, including register name and registration number, or state that the review was not registered.                                                                                                                                       | 3                               |
|                                                | 24b    | Indicate where the review protocol can be accessed, or state that a protocol was not prepared.                                                                                                                                                                                       | 3                               |
|                                                | 24c    | Describe and explain any amendments to information provided at registration or in the protocol.                                                                                                                                                                                      | 3                               |
| Support                                        | 25     | Describe sources of financial or non-financial support for the review, and the role of the funders or sponsors in the review.                                                                                                                                                        | 2                               |
| Competing interests                            | 26     | Declare any competing interests of review authors.                                                                                                                                                                                                                                   | 2                               |
| Availability of data, code and other materials | 27     | Report which of the following are publicly available and where they can be found: template data collection forms; data extracted from included studies; data used for all analyses; analytic code; any other materials used in the review.                                           | 4                               |

From: Page MJ, McKenzie JE, Bossuyt PM, Boutron I, Hoffmann TC, Mulrow CD, et al. The PRISMA 2020 statement: an updated guideline for reporting systematic reviews. *BMJ* 2021;372:n71. doi: 10.1136/bmj.n71

For peer review only, not for publication. Visit <http://www.prisma-statement.org/>

# BMJ Open

## The efficacy of probiotics in the management of halitosis: A systematic review and meta-analysis

|                                 |                                                                                                                                                                                                                                                                                                                                                                                                                                                                                                                                 |
|---------------------------------|---------------------------------------------------------------------------------------------------------------------------------------------------------------------------------------------------------------------------------------------------------------------------------------------------------------------------------------------------------------------------------------------------------------------------------------------------------------------------------------------------------------------------------|
| Journal:                        | <i>BMJ Open</i>                                                                                                                                                                                                                                                                                                                                                                                                                                                                                                                 |
| Manuscript ID                   | bmjopen-2022-060753.R1                                                                                                                                                                                                                                                                                                                                                                                                                                                                                                          |
| Article Type:                   | Original research                                                                                                                                                                                                                                                                                                                                                                                                                                                                                                               |
| Date Submitted by the Author:   | 21-Sep-2022                                                                                                                                                                                                                                                                                                                                                                                                                                                                                                                     |
| Complete List of Authors:       | Huang, Nengwen; Sichuan University, Department of Head and Neck Oncology<br>Li, Jinjin; Sichuan University, Department of Head and Neck Oncology<br>Qiao, Xianghe; Sichuan University, Department of Head and Neck Oncology<br>Wu, Yongzhi; Sichuan University, Department of Head and Neck Oncology<br>Liu, Yunkun; Sichuan University, Department of Head and Neck Oncology<br>Wu, chenzhou; Sichuan University West China Hospital of Stomatology<br>Li, Longjiang; Sichuan University, Department of Head and Neck Oncology |
| <b>Primary Subject Heading</b>: | Dentistry and oral medicine                                                                                                                                                                                                                                                                                                                                                                                                                                                                                                     |
| Secondary Subject Heading:      | Dentistry and oral medicine                                                                                                                                                                                                                                                                                                                                                                                                                                                                                                     |
| Keywords:                       | Microbiology < PATHOLOGY, Infectious diseases & infestations < DERMATOLOGY, Public health < INFECTIOUS DISEASES                                                                                                                                                                                                                                                                                                                                                                                                                 |
|                                 |                                                                                                                                                                                                                                                                                                                                                                                                                                                                                                                                 |

SCHOLARONE™  
Manuscripts



I, the Submitting Author has the right to grant and does grant on behalf of all authors of the Work (as defined in the below author licence), an exclusive licence and/or a non-exclusive licence for contributions from authors who are: i) UK Crown employees; ii) where BMJ has agreed a CC-BY licence shall apply, and/or iii) in accordance with the terms applicable for US Federal Government officers or employees acting as part of their official duties; on a worldwide, perpetual, irrevocable, royalty-free basis to BMJ Publishing Group Ltd ("BMJ") its licensees and where the relevant Journal is co-owned by BMJ to the co-owners of the Journal, to publish the Work in this journal and any other BMJ products and to exploit all rights, as set out in our [licence](#).

The Submitting Author accepts and understands that any supply made under these terms is made by BMJ to the Submitting Author unless you are acting as an employee on behalf of your employer or a postgraduate student of an affiliated institution which is paying any applicable article publishing charge ("APC") for Open Access articles. Where the Submitting Author wishes to make the Work available on an Open Access basis (and intends to pay the relevant APC), the terms of reuse of such Open Access shall be governed by a Creative Commons licence – details of these licences and which [Creative Commons](#) licence will apply to this Work are set out in our licence referred to above.

Other than as permitted in any relevant BMJ Author's Self Archiving Policies, I confirm this Work has not been accepted for publication elsewhere, is not being considered for publication elsewhere and does not duplicate material already published. I confirm all authors consent to publication of this Work and authorise the granting of this licence.

## Title page

**Title:** The efficacy of probiotics in the management of halitosis: A systematic review and meta-analysis

Nengwen Huang<sup>1\*</sup> Jinjin Li<sup>1\*</sup> Xianghe Qiao<sup>1</sup> Yongzhi Wu<sup>1</sup> Yunkun Liu<sup>1</sup> Chenzhou Wu<sup>1</sup> Longjiang Li<sup>1</sup>

<sup>1</sup>State Key Laboratory of Oral Diseases, National Clinical Research Center for Oral Diseases, Department of Head and Neck Oncology, West China Hospital of Stomatology, Sichuan University, Chengdu, China

\* Nengwen Huang and Jinjin Li contributed equally to this paper.

### Corresponding author:

Prof. Longjiang Li

E-mail: [muzili63@163.com](mailto:muzili63@163.com)

**Running title:** Probiotic treatment of halitosis

## ABSTRACT

**Background** Halitosis is defined as a foul odor emitted from the oral cavity. Many interventions have been used to control halitosis from mouthwashes to chewing gums. Probiotics have been reported as an alternative method to alleviate halitosis.

**Objective** The present study aimed to investigate the effect of probiotics on halitosis from a time perspective.

**Design and methods** This is a meta-analysis study performed in indexed databases up to February 2021. Randomized controlled trials were included that compared probiotics and placebo concerning primary outcomes [organoleptic (OLP) scores and volatile sulfur compounds (VSC) levels] and secondary outcomes [tongue coating scores (TCS) and plaque index (PI)]. Data extraction and quality assessment were conducted independently by two reviewers. Publication bias and leave-one-out analyses were performed.

**Results** Standardized mean difference (SMD) and 95% confidence interval (CI) were calculated to synthesize data. The data were sub-grouped and analyzed in the short term ( $\leq 4$  weeks) and long term ( $> 4$  weeks) based on the follow-up time. Seven articles were included in this meta-analysis. Primary outcomes, both OLP scores [SMD = -0.58; 95%CI (-0.87, -0.30),  $p < 0.0001$ ] and VSC levels [SMD = -0.26; 95%CI (-0.51, -0.01),  $p = 0.04$ ], significantly decreased in the probiotics group compared with the placebo group in the short term. However, a significant reduction was observed only in OLP scores [SMD = -0.45; 95%CI (-0.85, -0.04),  $p = 0.03$ ] in the long term. No significant differences were observed in secondary outcomes. There was no risk of publication bias. The leave-one-out analysis confirmed the consistency of the findings.

**Conclusions** According to the results of this work, it seems that probiotics (e.g., *Lactobacillus salivarius*, *Lactobacillus reuteri*, *Streptococcus salivarius*, and *Weissella cibaria*) may relieve halitosis in the short term ( $\leq 4$  weeks). The results of the biased assessment, limited data, and heterogeneity of clinical trials included might reduce the reliability of the conclusions.

### Strengths and limitations of this study

- 39 ▶ This study included larger RCTs involved in halitosis and probiotics.
- 40 ▶ The results were rationally analyzed from the follow-up time perspective.
- 41 ▶ Subgroup analysis was done to identify the sources of heterogeneity based on the component of VSC.
- 42 ▶ The included studies had limited patients.
- 43 ▶ Some studies reported the outcomes with different forms, increasing the heterogeneity of the results.

## 44 INTRODUCTION

45 Halitosis, also known as “oral malodor,” is typically defined as an unpleasant odor emanating from the  
46 oral cavity.<sup>1</sup> As a cause of patient's referral to the dentist, halitosis is the third most common disease,  
47 only ranking behind dental caries and periodontal disease.<sup>2</sup> According to an epidemiological study, the  
48 prevalence of halitosis is approximately 27.5% in the Chinese population.<sup>3</sup> People have a higher demand  
49 for social interactions and attach more importance to their personal image in today's society. Halitosis  
50 has a significant impact on both patients' daily work and social activities and may even result in frequent  
51 psychological problems such as anxiety, depression, and social isolation.<sup>4</sup> Clinically, halitosis is  
52 categorized into genuine halitosis, pseudo-halitosis, and halitophobia.<sup>5</sup> The latter two types are related  
53 to psychological conditions. Only genuine halitosis is caused by pathological and physiological factors.  
54 It includes intraoral halitosis (IOH) and extraoral halitosis, with the former accounting for 80-90% of  
55 the cases.<sup>6</sup>

56 The main etiologic factor of genuine halitosis is the volatile sulfur compounds (VSC) produced by  
57 oral bacteria via complex microbe–substrate and microbe-microbe interactions and putrefaction of  
58 organic substrates in the oral cavity, associated with poor oral hygiene, tongue coating, and periodontal  
59 disease.<sup>7-10</sup> In particular, hydrogen sulfide (H<sub>2</sub>S), methyl mercaptan (CH<sub>3</sub>SH), and dimethyl sulphide  
60 (C<sub>2</sub>H<sub>6</sub>S) are considered significant parameters and markers of halitosis.<sup>11</sup> Some microorganisms, such  
61 as *Fusobacterium. nucleatum*, *Porphyromonas. gingivalis*, *Prevotella. intermedia*, *Prevotella.*  
62 *nigrescens*, and *Treponema. Denticola*, not only do participate in periodontal diseases, but they also  
63 may facilitate the production of VSC metabolism.<sup>12</sup> Some studies using 16S rRNA amplicon sequencing  
64 and GC-MS-based metabolite profiling found that the bacterial composition, diversity, and metabolites  
65 of the halitosis group were different from those of the control group.<sup>13 14</sup> Therefore, the anaerobic oral  
66 condition might play an important role in the development of halitosis. Consequently, regulating the  
67 balance of the oral microbiota to reduce VSC levels is an important method to manage oral malodor.

68 The current treatments for halitosis include mechanical cleaning (scaling and tongue scraping) and  
69 chemical therapy (antibiotics, mouthwashes, and other agents).<sup>15 16</sup> However, mechanical therapy is  
70 often uncomfortable, even if carried out by the dentist. In addition, although chemical therapy is  
71 generally effective for a short time, it is always associated with various side effects, including the  
72 emergence of dysbacteriosis and staining of the tongue and tooth.<sup>17-20</sup> Consequently, new methods with  
73 fewer side effects are constantly suggested to inhibit oral malodor.

74 As live microorganisms, probiotics confer benefits to the host when administered in appropriate  
75 amounts.<sup>21</sup> Their beneficial effects are primarily related to regulating the local microenvironment  
76 through the prevention of adhesion of pathogens and inhibition of growth of pathogens through the  
77 production of bacteriocins.<sup>22 23</sup> Recently, probiotics like *Lactobacillus reuteri* and *Bifidobacteria* have been  
78 widely used in the oral field.<sup>24</sup> There is a growing body of evidence that the administration of probiotics  
79 might affect the composition of oral biofilms. They have also been investigated in the treatment of

1  
2  
3 80 periodontal<sup>25 26</sup> and peri-implant diseases,<sup>27 28</sup> caries,<sup>29</sup> oral candidiasis<sup>30 31</sup>, and oral mucositis induced by  
4 81 chemo-radiotherapy.<sup>32</sup> Meanwhile, probiotics have also been reported as an alternative strategy to relieve  
5 82 oral malodor.<sup>33-37</sup> However, a previous systematic review showed that probiotic therapy for oral malodor  
6 83 is associated with insufficient evidence for its recommendation.<sup>38</sup> Thus, it is necessary to carry out a  
7 84 focused analysis of the therapeutic effects of probiotics in the treatment of halitosis.

8 85 Therefore, this systematic review and meta-analysis was undertaken to investigate the effect of  
9 86 probiotics on managing halitosis from a time perspective to provide some evidence for the  
10 87 administration of probiotics in this field.

## 11 88 **METHODS**

### 12 89 **Patient and public involvement**

13 90 No patient was involved in the study.  
14 91

### 15 92 **Study design**

16 93 This systematic review was based on the recommendations of the Preferred Reporting Items for  
17 94 Systematic Reviews and Meta-Analyses (PRISMA) guidelines and registered in the PROSPERO  
18 95 (CRD42021227504).<sup>39</sup> According to the PICOS principle, the following focused question was  
19 96 structured: What is the clinical efficacy of probiotics in patients with halitosis when compared with  
20 97 placebo treatment? To answer our research question, we selected clinical trials according to the  
21 98 following study inclusion and exclusion criteria.

### 22 99 **Search strategy**

23 100 A critical electronic search was conducted in the bibliographic databases, mainly including PubMed,  
24 101 EMBASE, Web of Science, and Cochrane Central Register of Controlled Trials up to and including  
25 102 February 2021 to select the published literature. Additionally, gray literature was searched in the  
26 103 database System for Information on Gray literature in European and Google Scholar. The reference lists  
27 104 of the included articles and some related Chinese journals were also searched manually. There was no  
28 105 language restriction.

29 106 An initial search strategy was conducted in PubMed with the combination of Medical Subject  
30 107 Headings (Mesh) terms identified by an asterisk symbol (\*) and free text words as follows: Probiotic  
31 108 OR Probiotic\* OR Probiotic therapy OR Probiotic effect OR Probiotic treatment AND halitosis OR  
32 109 halitosis \* OR malodor OR oral malodor OR malodour OR bad breath OR fetor oris. The detailed search  
33 110 strategy for each database is mentioned in supplemental file 1. Endnote X7 was used for electronic title  
34 111 management. First, primary screening was performed independently by two reviewers (NWH and JJJ)  
35 112 based on the titles and abstracts. Then, the full-text articles were used to assess the eligibility further.  
36 113 Any disagreement was solved by consulting a third reviewer.

## 114 Study inclusion and exclusion criteria

115 The populations were patients diagnosed with halitosis. The intervention was probiotic therapy,  
116 representing the experiment group. The control group was done with a placebo treatment. The considered  
117 outcomes were halitosis parameters and other indexes before and after treatment. During the first stage  
118 of the study selection, studies meeting the following conditions were considered eligible for this review:  
119 1) study types: randomized controlled clinical trials (RCTs) or randomized controlled cross-over studies;  
120 2) participants: systemically healthy patients diagnosed with halitosis via accepted standards (the  
121 organoleptic scores and/or the concentrations of VSC); 3) interventions: evaluating the efficacy of  
122 probiotics with placebo, regardless of the probiotics species and the consumption method; 4) control  
123 interventions: placebo treatment; 5) clinical data: the measurement values, including halitosis  
124 parameters and other indexes before and after treatment. At the second stage of the selection, eligible  
125 studies acquired in the first stage were identified according to the following exclusion criteria: 1) *in*  
126 *vitro* and animal studies, letter to the editor, review articles, interviews, meta-analysis; 2) unclear  
127 halitosis identification; 3) studies with no completed data obtained even by contacting the authors. 4)  
128 interventions included other measures (e.g., studies comparing tongue scraping plus chlorhexidine plus  
129 probiotics and tongue scraping plus chlorhexidine).<sup>34</sup>

## 130 Halitosis assessment

131 The primary outcomes were evaluated for organoleptic (OLP) scores and the VSC concentration levels.  
132 OLP scores reflecting subjective perception were often treated as the gold standard for diagnosing  
133 halitosis clinically and in research.<sup>40-41</sup> The OLP scores were estimated by two or three evaluators (with  
134 training and experience in calibrating tests). Subjects closed their mouth for 1 min and then exhaled  
135 slowly from their mouth into the evaluator's nose at a distance of 10 cm. The score was evaluated  
136 according to a six-point '0–5' scale (Rosenberg scale).<sup>42</sup>

137 The VSC concentrations measurement is an objective method through using the Halimeter or Oral  
138 Chroma with no significant difference.<sup>43</sup> Compared with organoleptic evaluation, VSC measurement is  
139 a quantitative variable with high sensitivity and reproducibility.<sup>44-46</sup> Subjects had to keep their mouth  
140 closed and stop talking for 5 min before measurements. Halimeter: a beverage straw (fixed and attached  
141 to the device) was inserted into the subject's mouth, located at the back of the tongue dorsum. Subjects  
142 should keep their mouth slightly open and breathe through the nose. Oral Chroma: Subjects were asked  
143 to keep their mouths closed for 30 s with an air-tight syringe. Then, 1 mL of mouth air was extracted  
144 from the subject and injected into Oral Chroma to measure the VSC concentration.<sup>47</sup> Then the mean of  
145 the results given by the evaluators or machines was used.

## 146 Risk of bias

147 The included studies underwent a quality assessment with the Revised Cochrane risk of bias tool for  
148 randomized trials (RoB2).<sup>48</sup> This tool assesses the risk of bias in five domain areas, including  
149 randomization process, deviations from intended interventions, missing outcome data, measurement of  
150 outcome, and selection of the reported result. Each domain assessed bias following several signaling  
151 questions. The overall bias was classified as a high risk of bias, some concerns, or a low risk of bias  
152 determined by a validated algorithm. After screening the articles, two reviewers (NWH and JJJ)  
153 conducted the assessment independently to reach an agreement.

## 154 **Data extraction**

155 Data were extracted with a researcher-designed data form with the following information: 1) basic  
156 information of the included studies (first author's name and the year of publication); 2) study type  
157 (RCT); 3) diagnostic criteria for halitosis; 4) characteristics of the participants (sample volume, the age  
158 range); 5) treatment (probiotic administration, including the type of bacteria, vehicles, doses, and  
159 frequencies); 6) clinical parameters (including the primary and secondary outcomes of final  
160 participants); 7) significance and follow-up periods.

161 Of all these variables, the follow-up periods referred to the duration of probiotic use. If probiotic  
162 treatment ceased during the observation period, only the data before ceasing treatment were included.  
163 Concerning clinical parameters, OLP scores and VSC concentrations were considered the primary  
164 outcomes, directly associated with oral malodor. The secondary outcomes in this review included  
165 tongue coating scores (TCS) and plaque index (PI) because they are commonly regarded as halitosis  
166 causes.

## 167 **Statistical analysis**

168 The statistical analysis was performed with Review Manager 5.3 and Stata 12.0. All the data were  
169 group-analyzed according to the follow-up time. The time  $\leq 4$  weeks was considered the short-term  
170 period and the time  $> 4$  weeks was considered the long-term period. In one study with three observation  
171 periods, the values of 4 weeks were analyzed in the short term to keep consistent with other studies.<sup>49</sup>  
172 Study heterogeneity was evaluated using Q statistics and the  $I^2$  test. P value  $< 0.10$  was treated as the  
173 standard test. When  $I^2 > 50\%$  or p value  $< 0.10$ , there was significant heterogeneity between the studies.<sup>50-</sup>  
174 <sup>52</sup> Then, subgroup analysis and sensitivity analysis were performed to analyze the sources of  
175 heterogeneity. The continuous data on the halitosis parameters of the present studies were expressed  
176 with the standardized mean difference (SMD) and 95% CI (confidence interval). A random-effect  
177 model was used for analysis. Therefore, the mean difference and standard deviation had to be acquired.  
178 If the original text did not provide the related data, the mean difference could be calculated, and the  
179 standard deviation was obtained with the formula ( $r_d = \sqrt{r_1^2/n_1 + r_2^2/n_2}$ ). The excel sheets in the  
180 articles were used to convert the values when provided with median and interquartile.<sup>53 54</sup> Publication  
181 bias was performed subjectively by funnel plots and objectively by Egger's tests. In Egger's test, p  
182 value  $< 0.05$  indicates the presence of publication bias.<sup>55</sup> Sensitivity analysis (leave-one-out method)  
183 was conducted to evaluate the consistency of outcomes by sequential omission of individual studies.<sup>56</sup>

## 184 **RESULTS**

### 185 **Study selection**

186 In total, 238 articles were potentially identified by electronic and manual searches. After eliminating  
187 the duplicates, 14 articles were included by screening the titles and abstracts. Then, these studies were  
188 evaluated by reading the full texts, and seven articles met the final inclusion criteria (Figure 1).<sup>42 49 57-61</sup>



## 189 Study characteristics

190 Table 1 presents the main characteristics of the included studies. In this review, all the studies were  
 191 randomized control trials. The number of participants in the studies ranged between 23 and 68, with an  
 192 age range of 19 to 70. Halitosis was diagnosed with OLP scores and/or VSC concentrations. The  
 193 probiotics and placebo groups were compared, and the follow-up periods varied from two weeks to 12  
 194 weeks.

195 **Table 1** Characteristics of the included studies.

| Study                  | Type                                                        | Halitosis criterion                            | Subjects Age    | Clinical parameters                                                                               | Probiotics Administration (Vehicle, strains and frequency)                                                                                                                                                         | Follow-up                                |
|------------------------|-------------------------------------------------------------|------------------------------------------------|-----------------|---------------------------------------------------------------------------------------------------|--------------------------------------------------------------------------------------------------------------------------------------------------------------------------------------------------------------------|------------------------------------------|
| Mousquer et al. (2020) | RCT<br>Placebo-double<br>masked, parallel                   | OLP score $\geq$ 1                             | 29<br>$\geq$ 18 | OLP<br>VSC<br>TCS                                                                                 | A gum including 1 billion colony forming units (CFU) Lactobacillus salivarius G60 taken twice per day                                                                                                              | Baseline<br>2 weeks                      |
| Lee et al. (2020)      | RCT<br>Placebo-double<br>blind parallel                     | VSC $\geq$ 1.5ng/10<br>mL                      | 68<br>20-39     | OLP<br>VSC (H <sub>2</sub> S,<br>CH <sub>3</sub> S, C <sub>2</sub> H <sub>6</sub> S)              | An 800-mg tablet contained 1.0 $\times$ 10 <sup>8</sup> CFU/g Weissella cibaria taken once per day                                                                                                                 | Baseline<br>4 weeks<br>8weeks            |
| He et al. (2020)       | RCT<br>Placebo-double<br>blind parallel                     | OLP score $\geq$ 2<br>VSC $\geq$ 150ppb        | 28<br>23-44     | OLP<br>VSC<br>TCS<br>PI                                                                           | A tablet containing 1 $\times$ 10 <sup>9</sup> CFU Streptococcus salivarius K12 taken twice per day                                                                                                                | Baseline<br>4 weeks                      |
| Keller et al. (2012)   | RCT<br>Placebo-double<br>blind cross-over                   | OLP score $>$ 1                                | 25<br>19-25     | OLP<br>VSC                                                                                        | A chewing gum containing Lactobacillus reuteri DSM 17938 and Lactobacillus reuteri ATCC PTA 5289 -both with a concentration of 1 $\times$ 10 <sup>8</sup> CFU taken twice per day                                  | Baseline<br>2 weeks                      |
| Suzuki et al. (2014)   | RCT<br>Double-blind<br>placebo-<br>controlled<br>Cross-over | OLP score $\geq$ 1.5                           | 23<br>22-67     | OLP<br>VSC (H <sub>2</sub> S,<br>CH <sub>3</sub> S, C <sub>2</sub> H <sub>6</sub> S)<br>PI<br>TCS | A tablet containing 6.7 $\times$ 10 <sup>8</sup> CFU Lactobacillus salivarius WB21 and 280mg xylitol taken 3 times per day                                                                                         | Baseline<br>2 weeks                      |
| Penala et al. (2016)   | RCT<br>Placebo-double<br>blind parallel                     | OLP score $>$ 2                                | 29<br>25-59     | OLP<br>PI                                                                                         | A capsule mixture included Lactobacillus salivarius (2 $\times$ 10 <sup>9</sup> CFU) and Lactobacillus reuteri (2 $\times$ 10 <sup>9</sup> CFU) dissolved into 10ml distilled water to rinse for 1min, daily twice | Baseline<br>4 weeks<br>12 weeks          |
| Kim et al. (2020)      | RCT<br>Placebo-double<br>blind parallel                     | OLP score $\geq$ 2<br>VSC $\geq$ 0.15ng/<br>ml | 58<br>20-70     | VSC (H <sub>2</sub> S,<br>CH <sub>3</sub> S, C <sub>2</sub> H <sub>6</sub> S)<br>OLP              | A bag of powder mixture included Weissella. cibaria CMU (1.0 $\times$ 10 <sup>8</sup> CFU) melted in the mouth once per day                                                                                        | Baseline<br>2 weeks<br>4 weeks<br>8weeks |

196 \*RCT: randomized controlled trials; OLP: organoleptic; VSC: volatile sulfur compounds; TCS: tongue coating scores; CFU:  
 197 colony forming units; H<sub>2</sub>S: hydrogen sulfide; CH<sub>3</sub>S: methyl mercaptan; C<sub>2</sub>H<sub>6</sub>S: methanethiol; PI: plaque index

## 198 Risk of bias

199 The bias estimation results showed that one study had a low risk of bias, one had a high risk, and five  
 200 showed some concerns. The reason for a high risk of bias was the incomplete outcome data of the OLP  
 201 scores. Five articles were identified as some concerns because there were many uncertain factors in  
 202 their full texts. Figure 2 presents concrete data on the risk of bias.

203

## 204 Study outcomes

### 205 Primary outcomes

206 Concerning OLP, studies by Keller et al. (2012) and Penala et al. (2016) reported a significant decrease  
207 in the probiotic group compared to the placebo group after treatment ( $p < 0.05$ ).<sup>58,59</sup> In the study by Lee  
208 et al. (2020) involving different follow-up periods, OLP scores decreased significantly in the test groups  
209 at four weeks ( $p = 0.002$ ) but not eight weeks ( $p = 0.188$ ) compared to the baseline.<sup>60</sup> Additionally, the  
210 results of the other four studies indicated that the OLP scores did not differ between the two groups.

211 Concerning VSC, six articles determined VSC concentrations, with three studies detecting the p  
212 values of VSC and subgroups ( $H_2S$ ,  $CH_3SH$ , and  $C_2H_6S$ ).<sup>49,57,60</sup> According to the results, only two  
213 studies<sup>57,60</sup> reported a significant improvement in VSC levels in experimental groups versus placebo  
214 groups.

### 215 Secondary outcomes

216 Concerning TCS, three studies evaluated the changes between the probiotic and placebo groups at four  
217 weeks.<sup>42,57,61</sup> Although a reduced tendency was observed after treatment compared with baseline p  
218 values, there was no significant difference between the two groups.

219 Concerning PI, in the three studies involved,<sup>42,57,59</sup> only one study showed a significant reduction in  
220 PI in the experimental group compared with the controlled group at 12 weeks.<sup>59</sup>

## 221 Quantitative synthesis

222 A meta-analysis was performed including studies with similar clinical parameters of OLP, VSC, TCS,  
223 and PI, according to the follow-up time. Although the detection methods of VSC were different, both  
224 of the devices exhibited similar sensitivity and specificity in the detection of halitosis.<sup>43</sup> Therefore, we  
225 analyzed these values together. Considering the limitations of the included studies and follow-up time,  
226 the pooled estimation of TCS and PI was only performed in the short term.

227 In the short term, the OLP scores significantly decreased in the probiotic group compared to the  
228 control group [SMD = -0.58; 95% CI (-0.87, -0.30),  $p < 0.0001$ ] (Figure 3). A similar result was observed  
229 in VSC [SMD = -0.26; 95% CI (-0.51, -0.01),  $p = 0.04$ ] and  $H_2S$  levels [SMD = -0.73; 95% CI (-1.36, -  
230 0.10),  $p = 0.02$ ]. Other items (TCS, PI,  $CH_3S$ , and  $C_2H_6S$ ) were not significantly different between the  
231 experimental and control groups. The heterogeneity of each outcome was low ( $I^2 < 50\%$ ) except for  $H_2S$   
232 levels ( $I^2 = 75\%$ ) (Figures 3 and 4).

233 In the long term, there was a significant improvement in OLP scores in the experimental group [SMD  
234 = -0.45; 95% CI (-0.85, -0.04),  $p = 0.03$ ] (Figure 5). The results failed to show a significant difference in  
235 VSC concentrations and their subgroups levels (Figures 5 and 6). The heterogeneity of VSC  
236 concentrations was substantial ( $I^2 = 58\%$ ).

## 237 Publication bias

238 In this systematic review and meta-analysis, we found no evidence of publication bias by the result of  
239 the funnel plots and Egger's tests ( $p > 0.05$ ) (supplementary file 2-Figures S1-S5).

## 240 **Sensitivity analysis**

241 Sensitivity analysis (leave-one-out method) revealed no significant change in the pooled estimation  
242 when excluding any individual study (supplementary file 2-Figures S6-S9).

243

## 244 **DISCUSSION**

### 245 **Summary of the findings**

246 This meta-analysis demonstrated that probiotics significantly reduced the OLP scores compared with  
247 the placebo group regardless of the duration of observation, confirming the benefits of probiotics for  
248 halitosis treatment. The probiotics group exhibited a significant reduction in VSC concentrations in the  
249 short term ( $\leq 4$  weeks), with no noticeable difference in the long term ( $> 4$  weeks). Meta-analyses were  
250 also performed in the subgroups of  $\text{H}_2\text{S}$ ,  $\text{CH}_3\text{SH}$ , and  $\text{C}_2\text{H}_6\text{S}$  to assess the concrete difference in VSC  
251 levels. The results showed that only  $\text{H}_2\text{S}$  levels reduced noticeably in the short term when the probiotic  
252 treatment was administered. As for TCS and PI, the results showed no significant differences between  
253 the experimental and placebo groups in the short term. There was no risk of publication bias. The  
254 sensitivity analysis confirmed the consistency of the findings.

### 255 **Outcomes comparison and possible mechanisms**

256 Concerning the primary outcomes, in the included articles, the pooled estimation of OLP scores and  
257 VSC concentrations were in favor of probiotic therapy rather than placebo in the short term.<sup>42 49 57-59 61</sup>  
258 The biological mechanisms may be related to the interaction between probiotics and oral microbiota.  
259 According to present studies, probiotic therapy reduces odorous compound levels by inhibiting the  
260 decomposition of amino acids and proteins by anaerobic bacteria.<sup>7 62</sup> The significantly lower VSC  
261 levels under probiotic treatment in the short term might indicate a decrease in anaerobic bacteria activity.  
262 In contrast to our findings, a previous study indicated that it could not confirm the effect of probiotics  
263 on reducing VSC in the short term.<sup>38</sup> The number of included articles may result in this difference.  
264 However, when comes to the results in the long term, only OLP scores showed a significant reduction  
265 rather than VSC concentrations. Oral microbiota contains not only VSC-producing bacteria but also  
266 other bacteria capable of producing other oral malodor compounds (e.g., indoles, skatole, pyridine,  
267 picolines, and polyamines).<sup>63</sup> The underlying mechanisms of the difference may result from the  
268 variation and abundance of microbiota community over time, which in turn affects the efficacy of  
269 probiotics, especially VSC concentration levels.<sup>35 49 61</sup> Therefore, the no significant effect on VSC  
270 concentrations in the long term may be due to probiotics' inhibition effect on those other bacteria.  
271 Therefore, the data about microorganisms changing in different periods are significant for the evaluation  
272 of probiotic effects. However, from the present studies, insufficient data in the included studies, the  
273 differences in detection methods, bacterial species, and heterogeneity of clinical trials limited the  
274 microorganism statistical analysis in this review.

275 Meanwhile, we found that the short-term outcome of  $\text{H}_2\text{S}$  concentration change other than  $\text{CH}_3\text{SH}$ ,  
276 and  $\text{C}_2\text{H}_6\text{S}$  was consistent with the total VSC. This might be related to differences in the function of  
277 probiotics and in the number and species of bacteria associated with each VSC reduction.<sup>12 35 64</sup>

278 Additionally, the regular VSC measurement device was reported to be more sensitive towards H<sub>2</sub>S than  
279 CH<sub>3</sub>SH and C<sub>2</sub>H<sub>6</sub>S,<sup>46</sup> which may also account for the above result.

280 Regarding the secondary outcomes, based on the present meta-analysis, there was no significant  
281 difference between the experimental and placebo groups on secondary outcomes during the observation  
282 time. The possible reason was the short observation time in the included studies, as one study included  
283 in the analysis showed a significant improvement in PI at 12 weeks.<sup>59</sup> Tongue coating and periodontitis  
284 are often regarded as the leading causes of halitosis.<sup>42 65</sup> However, in an original article, the TCS and  
285 PI showed a pronounced decline after using probiotics compared with the baseline, with no decrease in  
286 the placebo group.<sup>61</sup> This phenomenon might be related to the type of probiotics, some of which were  
287 reported to boost salivary flow by interacting with the oral microbiota.<sup>66</sup>

288 From the current studies, there are two main types of studies on the effect of probiotics on halitosis,  
289 one is to observe the effect during continuous use of probiotics and the other is to observe the effect at  
290 follow-up after stopping the use of probiotics. A recently published study indicated that no significance  
291 of probiotic effect was found, different from ours. The reason for the difference may be that this study  
292 analyzed the collected follow-up data after stopping using probiotics for at least 2 weeks.<sup>67</sup> Therefore,  
293 more clinical and systematic studies are needed to explore and verify the probiotic effect on the  
294 management of halitosis in future research.

### 295 **Limitation**

296 There were several limitations in the present study throughout the whole review process. First, although  
297 both electronic and hand searches were conducted in four primary databases, it was impossible to  
298 retrieve all the relevant studies. Second, the number of eligible studies and included subjects was small.  
299 Third, all included interventions differed in the species of probiotics, the doses used, frequencies, and  
300 administration periods. A subgroup analysis was necessary to evaluate the source of efficacy concerning  
301 the probiotic species, but the small size of the included articles prevented further analysis. All these  
302 factors would inevitably affect the accuracy of outcomes. Fourth, the detection methods of VSC were  
303 different. Although there is no significant difference between them, the combined analysis might still  
304 affect the reliability of the results. Fifth, in some included studies, the primary outcomes were presented  
305 in different forms, such as percentages or range interquartile. Finally, some important parameters,  
306 including the microorganism species and changes, were not presented completely in some articles. The  
307 absence of partial original data or the differences caused by data conversion equally impaired the final  
308 results though many methods were tried to reduce the bias.

### 309 **CONCLUSION**

310 The present systematic review and meta-analysis indicated that probiotics (e.g., *Lactobacillus salivarius*,  
311 *Lactobacillus reuters*, *Streptococcus salivarius*, and *Weissella cibaria*) may ease halitosis by reducing  
312 the VSC concentration levels in the short term, but there is no significant effect on the major cause of  
313 halitosis such as plaque and tongue coating. Considering the heterogeneity of clinical trials included  
314 and the small sample size, more high-quality random clinical trials are required in the future to verify  
315 the results and to evidence the usefulness of probiotics in the management of halitosis.

## 316 **Contributors**

317 NWH and JLL collected and analyzed data, and drafted the manuscript; NWH and XHQ helped with  
318 the literature searching and statistical analysis; YZW and CZW provided help in the literature searching  
319 and figure revises; XHQ and YKL critically reviewed the manuscript. LJL designed the experiment and  
320 critically reviewed the manuscript. NWH and JLL contributed equally to this paper. All authors agree  
321 to be accountable for the study.

## 322 **Competing interests**

323 None declared.

## 324 **Ethics approval statement**

325 No applicable.

## 326 **Funding**

327 This work was supported by the National Natural Science Foundation of China, China (Grant No.  
328 81972538)

## 329 **Data availability statement**

330 The data supporting the findings of this study are available from the corresponding author upon  
331 reasonable request.

## 332 **References**

- 333 1. Porter SR, Scully C. Oral malodour (halitosis). *Bmj* 2006;**333**(7569):632-5.
- 334 2. Rayman S, Almas K. Halitosis among racially diverse populations: an update. *Int J Dent Hyg* 2008;**6**(1):2-7.
- 335 3. Liu XN, Shinada K, Chen XC, et al. Oral malodor-related parameters in the Chinese general population. *J Clin*  
336 *Periodontol* 2006;**33**(1):31-6.
- 337 4. Sanz M, Roldán S, Herrera D. Fundamentals of breath malodour. *J Contemp Dent Pract* 2001;**2**(4):1-17.
- 338 5. Yaegaki K, Coil JM. Examination, classification, and treatment of halitosis; clinical perspectives. *J Can Dent*  
339 *Assoc* 2000;**66**(5):257-61.
- 340 6. Madhushankari GS, Yamunadevi A, Selvamani M, et al. Halitosis - An overview: Part-I - Classification,  
341 etiology, and pathophysiology of halitosis. *J Pharm Bioallied Sci* 2015;**7**(Suppl 2):S339-43.
- 342 7. Scully C, Porter S, Greenman J. What to do about halitosis. *Bmj* 1994;**308**(6923):217-8.

- 1  
2  
3 343 8. Silva MF, Cademartori MG, Leite FRM, et al. Is periodontitis associated with halitosis? A systematic review  
4 344 and meta-regression analysis. *J Clin Periodontol* 2017;**44**(10):1003-09.
- 5 345 9. Quirynen M, Dadamio J, Van den Velde S, et al. Characteristics of 2000 patients who visited a halitosis clinic.  
6 346 *J Clin Periodontol* 2009;**36**(11):970-5.
- 7 347 10. Stephen AS, Dhadwal N, Nagala V, et al. Interdental and subgingival microbiota may affect the tongue  
8 348 microbial ecology and oral malodour in health, gingivitis and periodontitis. *J Periodontol Res* 2021;**56**(6):1174-  
9 349 84.
- 10 350 11. Tonzetich J. Production and origin of oral malodor: a review of mechanisms and methods of analysis. *J*  
11 351 *Periodontol* 1977;**48**(1):13-20.
- 12 352 12. Foo LH, Balan P, Pang LM, et al. Role of the oral microbiome, metabolic pathways, and novel diagnostic  
13 353 tools in intra-oral halitosis: a comprehensive update. *Crit Rev Microbiol* 2021;**47**(3):359-75.
- 14 354 13. Ye W, Zhang Y, He M, et al. Relationship of tongue coating microbiome on volatile sulfur compounds in  
15 355 healthy and halitosis adults. *J Breath Res* 2019;**14**(1):016005.
- 16 356 14. Jo JK, Seo SH, Park SE, et al. Identification of Salivary Microorganisms and Metabolites Associated with  
17 357 Halitosis. *Metabolites* 2021;**11**(6).
- 18 358 15. Loesche WJ, Kazor C. Microbiology and treatment of halitosis. *Periodontol 2000* 2002;**28**:256-79.
- 19 359 16. Pham TA, Ueno M, Zaitu T, et al. Clinical trial of oral malodor treatment in patients with periodontal diseases.  
20 360 *J Periodontol Res* 2011;**46**(6):722-9.
- 21 361 17. Costalonga M, Herzberg MC. The oral microbiome and the immunobiology of periodontal disease and caries.  
22 362 *Immunol Lett* 2014;**162**(2 Pt A):22-38.
- 23 363 18. Fedorowicz Z, Aljufairi H, Nasser M, et al. Mouthrinses for the treatment of halitosis. *Cochrane Database*  
24 364 *Syst Rev* 2008(4):Cd006701.
- 25 365 19. Scully C, Greenman J. Halitology (breath odour: aetiopathogenesis and management). *Oral Dis*  
26 366 2012;**18**(4):333-45.
- 27 367 20. van Steenberghe D, Avontroodt P, Peeters W, et al. Effect of different mouthrinses on morning breath. *J*  
28 368 *Periodontol* 2001;**72**(9):1183-91.
- 29 369 21. Guarner F, Perdigon G, Corthier G, et al. Should yoghurt cultures be considered probiotic? *Br J Nutr*  
30 370 2005;**93**(6):783-6.
- 31 371 22. Cosseau C, Devine DA, Dullaghan E, et al. The commensal *Streptococcus salivarius* K12 downregulates the  
32 372 innate immune responses of human epithelial cells and promotes host-microbe homeostasis. *Infect Immun*  
33 373 2008;**76**(9):4163-75.
- 34 374 23. Devine DA, Marsh PD. Prospects for the development of probiotics and prebiotics for oral applications. *J*  
35 375 *Oral Microbiol* 2009;**1**.
- 36 376 24. Gungor OE, Kirzioglu Z, Kivanc M. Probiotics: can they be used to improve oral health? *Benef Microbes*  
37 377 2015;**6**(5):647-56.
- 38 378 25. Vicario M, Santos A, Violant D, et al. Clinical changes in periodontal subjects with the probiotic *Lactobacillus*  
39 379 *reuteri* Prodentis: a preliminary randomized clinical trial. *Acta Odontol Scand* 2013;**71**(3-4):813-9.
- 40 380 26. Vivekananda MR, Vandana KL, Bhat KG. Effect of the probiotic *Lactobacilli reuteri* (Prodentis) in the  
41 381 management of periodontal disease: a preliminary randomized clinical trial. *J Oral Microbiol* 2010;**2**.
- 42 382 27. Flichy-Fernández AJ, Ata-Ali J, Alegre-Domingo T, et al. The effect of orally administered probiotic  
43 383 *Lactobacillus reuteri*-containing tablets in peri-implant mucositis: a double-blind randomized controlled trial. *J*  
44 384 *Periodontol Res* 2015;**50**(6):775-85.
- 45 385 28. Alqahtani F, Alshaikh M, Mehmood A, et al. Efficacy of Antibiotic Versus Probiotics As Adjuncts to  
46 386 Mechanical Debridement for the Treatment of Peri-Implant Mucositis. *J Oral Implantol* 2022;**48**(2):99-104.

- 1  
2  
3 387 29. Laleman I, Detaillleur V, Slot DE, et al. Probiotics reduce mutans streptococci counts in humans: a systematic  
4 388 review and meta-analysis. *Clin Oral Investig* 2014;**18**(6):1539-52.
- 5 389 30. Mendonça FH, Santos SS, Faria Ida S, et al. Effects of probiotic bacteria on Candida presence and IgA anti-  
6 390 Candida in the oral cavity of elderly. *Braz Dent J* 2012;**23**(5):534-8.
- 7 391 31. Li D, Li Q, Liu C, et al. Efficacy and safety of probiotics in the treatment of Candida-associated stomatitis.  
8 392 *Mycoses* 2014;**57**(3):141-6.
- 9 393 32. Xia C, Jiang C, Li W, et al. A Phase II Randomized Clinical Trial and Mechanistic Studies Using Improved  
10 394 Probiotics to Prevent Oral Mucositis Induced by Concurrent Radiotherapy and Chemotherapy in Nasopharyngeal  
11 395 Carcinoma. *Front Immunol* 2021;**12**:618150.
- 12 396 33. Burton JP, Chilcott CN, Moore CJ, et al. A preliminary study of the effect of probiotic *Streptococcus salivarius*  
13 397 K12 on oral malodour parameters. *J Appl Microbiol* 2006;**100**(4):754-64.
- 14 398 34. Jamali Z, Aminabadi NA, Samiei M, et al. Impact of Chlorhexidine Pretreatment Followed by Probiotic  
15 399 *Streptococcus salivarius* Strain K12 on Halitosis in Children: A Randomised Controlled Clinical Trial. *Oral*  
16 400 *Health Prev Dent* 2016;**14**(4):305-13.
- 17 401 35. Benic GZ, Farella M, Morgan XC, et al. Oral probiotics reduce halitosis in patients wearing orthodontic braces:  
18 402 a randomized, triple-blind, placebo-controlled trial. *J Breath Res* 2019;**13**(3):036010.
- 19 403 36. Gurpinar B, Yildirim G, Kumral TL, et al. A simple method to reduce halitosis; tongue scraping with probiotics.  
20 404 *J Breath Res* 2019;**14**(1):016008.
- 21 405 37. Yoo HJ, Jwa SK, Kim DH, et al. Inhibitory effect of *Streptococcus salivarius* K12 and M18 on halitosis in  
22 406 vitro. *Clin Exp Dent Res* 2020;**6**(2):207-14.
- 23 407 38. Yoo JI, Shin IS, Jeon JG, et al. The Effect of Probiotics on Halitosis: a Systematic Review and Meta-analysis.  
24 408 *Probiotics Antimicrob Proteins* 2019;**11**(1):150-57.
- 25 409 39. Moher D, Liberati A, Tetzlaff J, et al. Preferred reporting items for systematic reviews and meta-analyses: the  
26 410 PRISMA statement. *PLoS Med* 2009;**6**(7):e1000097.
- 27 411 40. Bollen CM, Beikler T. Halitosis: the multidisciplinary approach. *Int J Oral Sci* 2012;**4**(2):55-63.
- 28 412 41. Erovic Ademovski S, Lingström P, Winkel E, et al. Comparison of different treatment modalities for oral  
29 413 halitosis. *Acta Odontol Scand* 2012;**70**(3):224-33.
- 30 414 42. He L, Yang H, Chen Z, et al. The Effect of *Streptococcus salivarius* K12 on Halitosis: a Double-Blind,  
31 415 Randomized, Placebo-Controlled Trial. *Probiotics Antimicrob Proteins* 2020;**12**(4):1321-29.
- 32 416 43. Vandekerckhove B, Van den Velde S, De Smit M, et al. Clinical reliability of non-organoleptic oral malodour  
33 417 measurements. *J Clin Periodontol* 2009;**36**(11):964-9.
- 34 418 44. Rosenberg M, Kulkarni GV, Bosy A, et al. Reproducibility and sensitivity of oral malodor measurements with  
35 419 a portable sulphide monitor. *J Dent Res* 1991;**70**(11):1436-40.
- 36 420 45. Seemann R, Duarte da Conceicao M, Filippi A, et al. [Halitosis management by the general dental practitioner-  
37 421 results of an International Consensus Workshop\*]. *Swiss Dent J* 2014;**124**(11):1205-11.
- 38 422 46. Rosenberg M, Septon I, Eli I, et al. Halitosis measurement by an industrial sulphide monitor. *J Periodontol*  
39 423 1991;**62**(8):487-9.
- 40 424 47. Laleman I, Dadamio J, De Geest S, et al. Instrumental assessment of halitosis for the general dental practitioner.  
41 425 *J Breath Res* 2014;**8**(1):017103.
- 42 426 48. Sterne JAC, Savović J, Page MJ, et al. RoB 2: a revised tool for assessing risk of bias in randomised trials.  
43 427 *Bmj* 2019;**366**:l4898.
- 44 428 49. Kim D-H, Kang M-S, Yeu J-E, et al. Inhibitory effect of the probiotic bacteria, *Weissella cibaria* CMU on  
45 429 halitosis: a randomized placebo-controlled study. *Journal of Korean Academy of Oral Health* 2020;**44**(4):246-52.
- 46 430 50. Higgins JP, Thompson SG. Quantifying heterogeneity in a meta-analysis. *Stat Med* 2002;**21**(11):1539-58.
- 57  
58  
59  
60

- 431 51. Hedges LV, Vevea JL. Fixed- and random-effects models in meta-analysis. *Psychological Methods* 1998;**3**(4):486-504.
- 432
- 433 52. DerSimonian R, Laird N. Meta-analysis in clinical trials. *Control Clin Trials* 1986;**7**(3):177-88.
- 434 53. Wan X, Wang W, Liu J, et al. Estimating the sample mean and standard deviation from the sample size, median, range and/or interquartile range. *BMC Med Res Methodol* 2014;**14**:135.
- 435
- 436 54. Luo D, Wan X, Liu J, et al. Optimally estimating the sample mean from the sample size, median, mid-range, and/or mid-quartile range. *Stat Methods Med Res* 2018;**27**(6):1785-805.
- 437
- 438 55. Egger M, Davey Smith G, Schneider M, et al. Bias in meta-analysis detected by a simple, graphical test. *Bmj* 1997;**315**(7109):629-34.
- 439
- 440 56. Patsopoulos NA, Evangelou E, Ioannidis JP. Sensitivity of between-study heterogeneity in meta-analysis: proposed metrics and empirical evaluation. *Int J Epidemiol* 2008;**37**(5):1148-57.
- 441
- 442 57. Suzuki N, Yoneda M, Tanabe K, et al. Lactobacillus salivarius WB21--containing tablets for the treatment of oral malodor: a double-blind, randomized, placebo-controlled crossover trial. *Oral Surg Oral Med Oral Pathol Oral Radiol* 2014;**117**(4):462-70.
- 443
- 444
- 445 58. Keller MK, Bardow A, Jensdottir T, et al. Effect of chewing gums containing the probiotic bacterium Lactobacillus reuteri on oral malodour. *Acta Odontol Scand* 2012;**70**(3):246-50.
- 446
- 447 59. Penala S, Kalakonda B, Pathakota KR, et al. Efficacy of local use of probiotics as an adjunct to scaling and root planing in chronic periodontitis and halitosis: A randomized controlled trial. *J Res Pharm Pract* 2016;**5**(2):86-93.
- 448
- 449
- 450 60. Lee DS, Lee SA, Kim M, et al. Reduction of Halitosis by a Tablet Containing Weissella cibaria CMU: A Randomized, Double-Blind, Placebo-Controlled Study. *J Med Food* 2020;**23**(6):649-57.
- 451
- 452 61. Mousquer CR, Della Bona A, Milani DC, et al. Are Lactobacillus salivarius G60 and inulin more efficacious to treat patients with oral halitosis and tongue coating than the probiotic alone and placebo? A randomized clinical trial. *J Periodontol* 2020;**91**(6):775-83.
- 453
- 454
- 455 62. Suzuki N, Yoneda M, Takeshita T, et al. Induction and inhibition of oral malodor. *Mol Oral Microbiol* 2019;**34**(3):85-96.
- 456
- 457 63. Takeshita T, Suzuki N, Nakano Y, et al. Discrimination of the oral microbiota associated with high hydrogen sulfide and methyl mercaptan production. *Sci Rep* 2012;**2**:215.
- 458
- 459 64. Kleinberg I, Westbay G. Oral malodor. *Crit Rev Oral Biol Med* 1990;**1**(4):247-59.
- 460
- 461 65. Iatropoulos A, Panis V, Mela E, et al. Changes of volatile sulphur compounds during therapy of a case series of patients with chronic periodontitis and halitosis. *J Clin Periodontol* 2016;**43**(4):359-65.
- 462
- 463 66. Ferrer MD, López-López A, Nicolescu T, et al. Topic Application of the Probiotic Streptococcus dentisani Improves Clinical and Microbiological Parameters Associated With Oral Health. *Front Cell Infect Microbiol* 2020;**10**:465.
- 464
- 465 67. López-Valverde N, López-Valverde A, Macedo de Sousa B, et al. Role of Probiotics in Halitosis of Oral Origin: A Systematic Review and Meta-Analysis of Randomized Clinical Studies. *Front Nutr* 2021;**8**:787908.
- 466

## 467 Figure legends

468 Figure 1: Flow diagram of literature search strategy and inclusion, exclusion criteria.

469 Figure 2: Quality assessment of the selected studies (the Revised Cochrane risk of bias tool for randomized trials (RoB2)). Green represents low risk of bias, yellow represents some concerns and red represents a high risk of bias.

472 Figure 3: Forest plot of halitosis parameters in short-term ( $\leq 4$  weeks): (A) OLP scores; (B) VSC



1  
2  
3 473 concentrations; (C) TCS; (D) PI.

4 474 Figure 4: Forest plot of VSC subgroups in short-term ( $\leq 4$  weeks): (A) H<sub>2</sub>S; (B) CH<sub>3</sub>S; (C) C<sub>2</sub>H<sub>6</sub>S.

5 475 Figure 5: Forest plot of halitosis parameters in long-term ( $>4$  weeks): (A) OLP scores; (B) VSC  
6 476 concentrations.

7 477 Figure 6: Forest plot of VSC subgroups in long-term ( $>4$  weeks): (A) H<sub>2</sub>S; (B) CH<sub>3</sub>S; (C) C<sub>2</sub>H<sub>6</sub>S.

8 478 Figure S1: Funnel plot of halitosis parameters in short-term ( $\leq 4$  weeks): (A) OLP scores; (B) VSC  
9 479 concentrations; (C) TCS; (D) PI.

10 480 Figure S2: Funnel plot of halitosis parameters in long-term ( $>4$  weeks): (A) OLP scores; (B) VSC  
11 481 concentrations.

12 482 Figure S3: Funnel plot of VSC subgroups in short-term ( $\leq 4$  weeks): (A) H<sub>2</sub>S; (B) CH<sub>3</sub>S; (C) C<sub>2</sub>H<sub>6</sub>S.

13 483 Figure S4: Funnel plot of VSC subgroups in long-term ( $>4$  weeks): (A) H<sub>2</sub>S; (B) CH<sub>3</sub>S; (C) C<sub>2</sub>H<sub>6</sub>S.

14 484 Figure S5: The result of Egger's test in short-term ( $\leq 4$  weeks): (A) OLP scores; (B) VSC concentrations;  
15 485 (C) TCS; (D) PI; (E) H<sub>2</sub>S; (F) CH<sub>3</sub>S; (G) C<sub>2</sub>H<sub>6</sub>S.

16 486 Figure S6: Sensitivity analysis of halitosis parameters in short-term ( $\leq 4$  weeks): (A) OLP scores; (B)  
17 487 VSC concentrations; (C) TCS; (D) PI.

18 488 Figure S7: Sensitivity analysis of halitosis parameters in long-term ( $>4$  weeks): (A) OLP scores; (B)  
19 489 VSC concentrations.

20 490 Figure S8: Sensitivity analysis of VSC subgroups in short-term ( $\leq 4$  weeks): (A) H<sub>2</sub>S; (B) CH<sub>3</sub>S; (C)  
21 491 C<sub>2</sub>H<sub>6</sub>S.

22 492 Figure S9: Sensitivity analysis of VSC subgroups in long-term ( $>4$  weeks): (A) H<sub>2</sub>S; (B) CH<sub>3</sub>S; (C)  
23 493 C<sub>2</sub>H<sub>6</sub>S.  
24 494

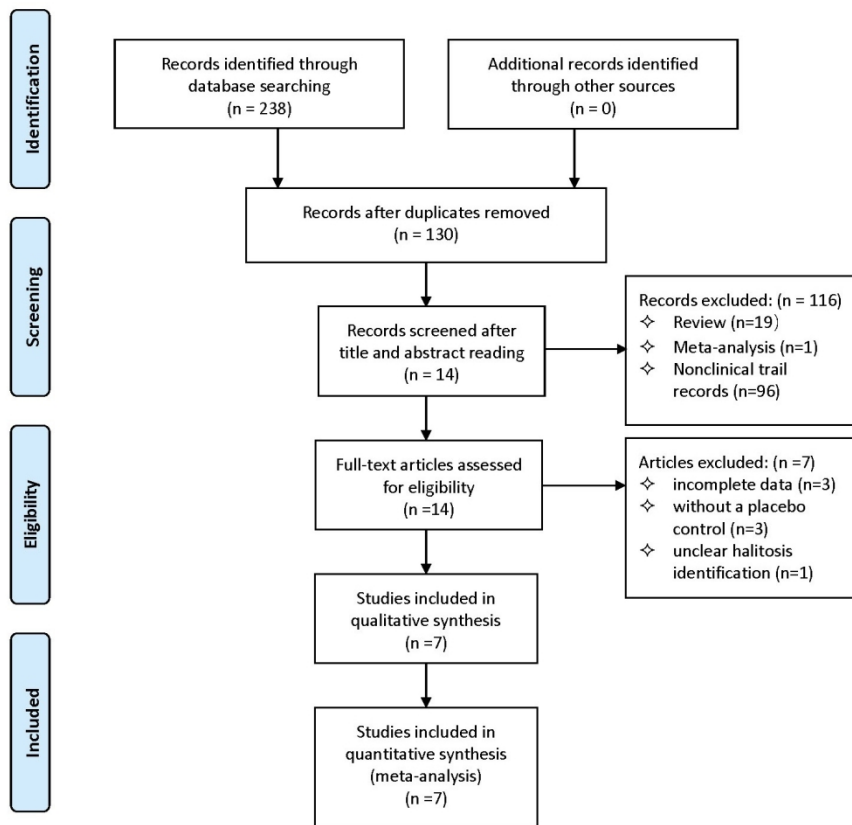

Flow diagram of literature search strategy and inclusion, exclusion criteria.

142x118mm (300 x 300 DPI)

| Intention-to-treat | Unique ID | Study ID       | Experimental | Comparator | Outcome              | Weight | D1 | D2 | D3 | D4 | D5 | Overall |
|--------------------|-----------|----------------|--------------|------------|----------------------|--------|----|----|----|----|----|---------|
|                    | 1         | He 2020        | probiotic    | placebo    | halitosis parameters | 1      | +  | !  | +  | +  | !  | !       |
|                    | 2         | Keller 2012    | probiotic    | placebo    | halitosis parameters | 1      | +  | !  | !  | +  | +  | !       |
|                    | 3         | Kim 2020       | probiotic    | placebo    | halitosis parameters | 1      | +  | !  | +  | +  | +  | !       |
|                    | 4         | Lee 2020       | probiotic    | placebo    | halitosis parameters | 1      | +  | !  | +  | +  | +  | !       |
|                    | 5         | Moussaqer 2020 | probiotic    | placebo    | halitosis parameters | 1      | +  | +  | +  | +  | +  | +       |
|                    | 6         | Penala 2016    | probiotic    | placebo    | halitosis parameters | 1      | +  | !  | +  | +  | +  | !       |
|                    | 7         | Suzuki 2014    | probiotic    | placebo    | halitosis parameters | 1      | +  | !  | +  | +  | +  | !       |

+ Low risk  
! Some concerns  
! High risk  
 D1 Randomisation process  
 D2 Deviations from the intended interventions  
 D3 Missing outcome data  
 D4 Measurement of the outcome  
 D5 Selection of the reported result

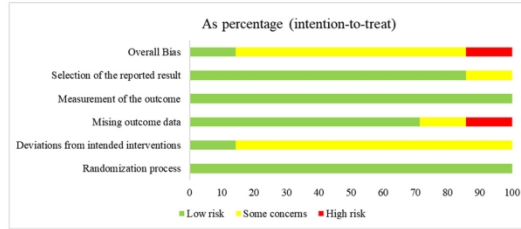

Quality assessment of the selected studies (the Revised Cochrane risk of bias tool for randomized trials (RoB2)). Green represents low risk of bias, yellow represents some concerns and red represent high risk of bias.

167x93mm (600 x 600 DPI)

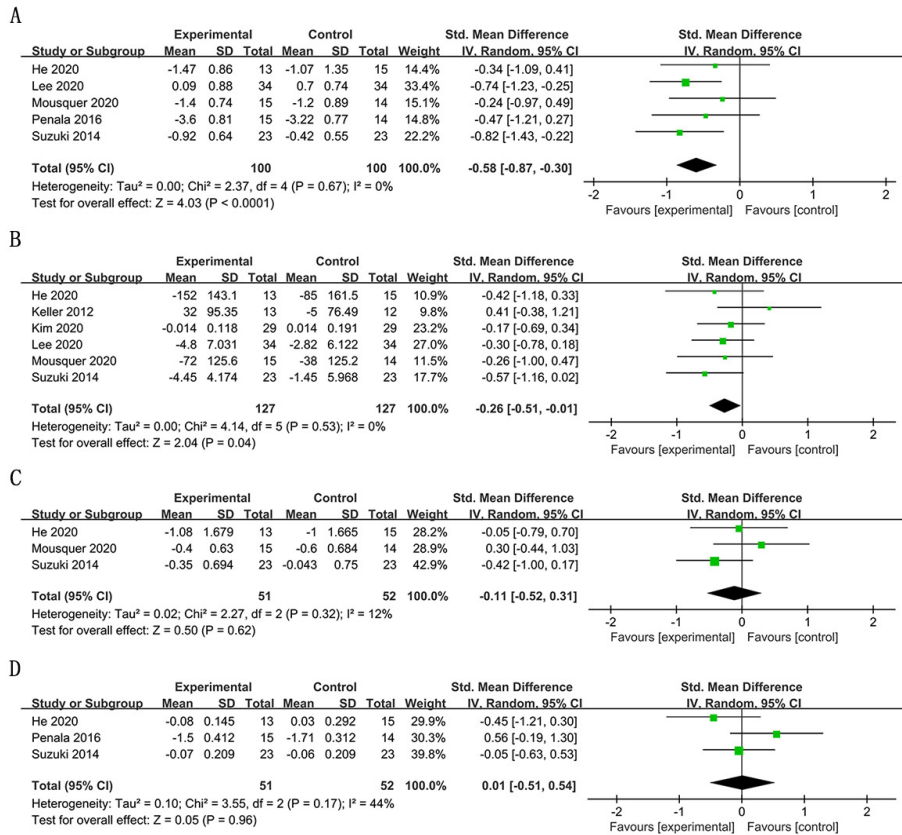

Forest plot of halitosis parameters in short-term ( $\leq 4$  weeks): (A) OLP scores; (B) VSC concentrations; (C) TCS; (D) PI.

108x96mm (300 x 300 DPI)

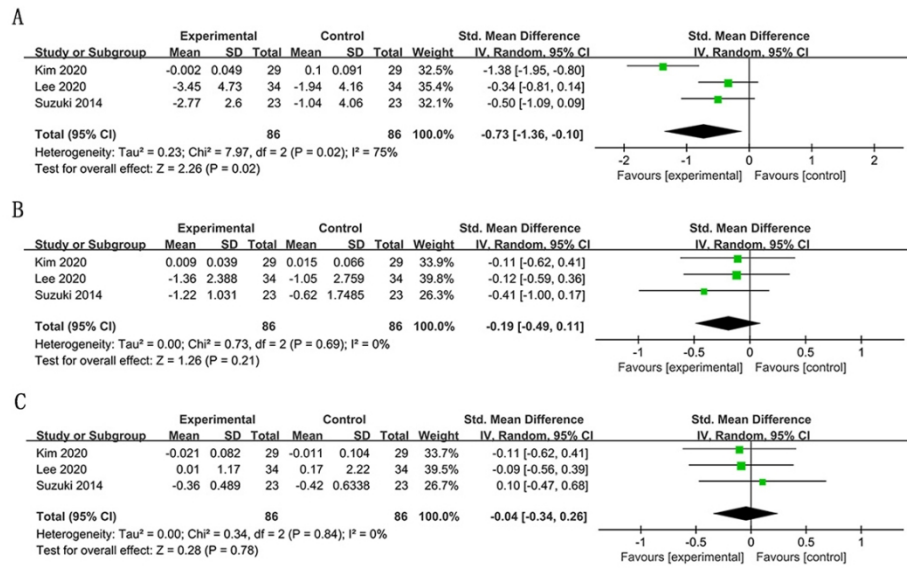

Forest plot of VSC subgroups in short-term ( $\leq 4$  weeks): (A) H<sub>2</sub>S; (B) CH<sub>3</sub>S; (C) C<sub>2</sub>H<sub>6</sub>S.

107x73mm (300 x 300 DPI)

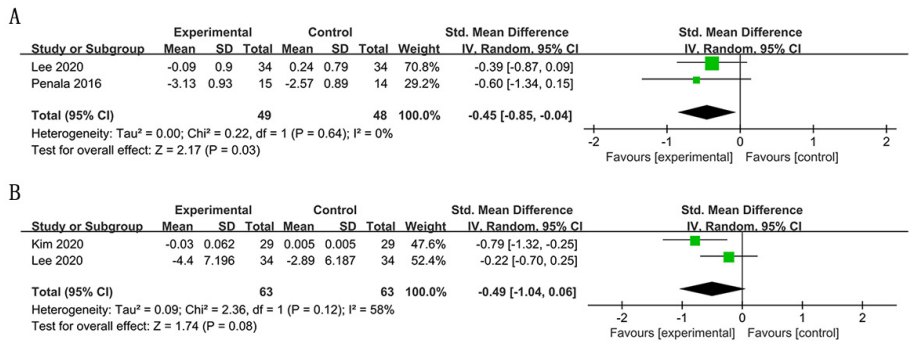

Forest plot of halitosis parameters in long-term (>4 weeks): (A) OLP scores; (B) VSC concentrations.

108x45mm (300 x 300 DPI)

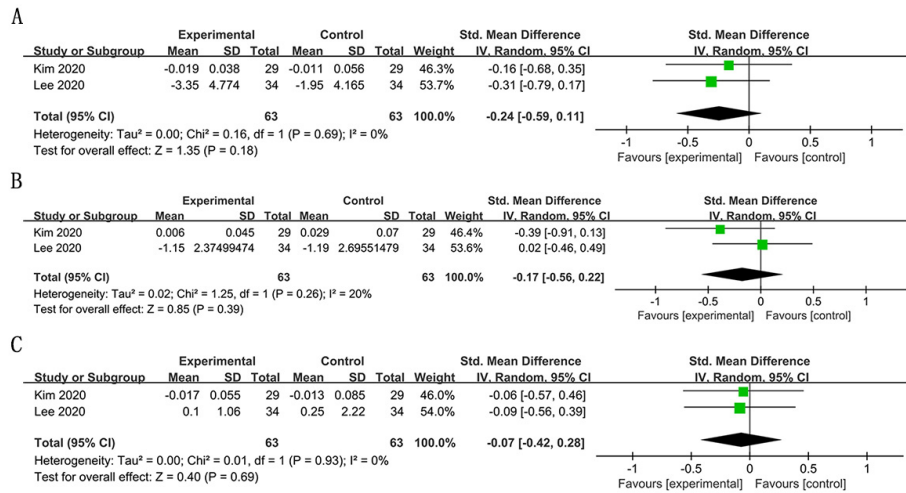

Forest plot of VSC subgroups in long-term (&gt;4 weeks): (A) H2S; (B) CH3S; (C) C2H6S.

108x61mm (300 x 300 DPI)

# Supplementary file 1

## 1. PubMed

| Search | Query                                                                                                                                                                                           | Items found |
|--------|-------------------------------------------------------------------------------------------------------------------------------------------------------------------------------------------------|-------------|
| #1     | (((((Probiotic[Text Word]) OR (Probiotic[MeSH Terms])) OR (Probiotic therapy[Text Word])) OR (Probiotic effect[Text Word])) OR (Probiotic treatment[Text Word]))                                | 27215       |
| #2     | (((((halitosis[Text Word]) OR (halitosis[MeSH Terms])) OR (malodor[Text Word])) OR (oral malodor[Text Word])) OR (malodour[Text Word])) OR (bad breath[Text Word])) OR (fedor oris[Text Word])) | 2788        |
| #3     | #1 and #2                                                                                                                                                                                       | 68          |

## 2. Web of science

| Search | Query                                                                                                                 | Items found |
|--------|-----------------------------------------------------------------------------------------------------------------------|-------------|
| #1     | ((TS=(Probiotic)) OR TS=(Probiotic therapy)) OR TS=(Probiotic effect)) OR TS=(Probiotic treatment)                    | 28458       |
| #2     | (((((TS=(halitosis)) OR TS=(malodor)) OR TS=(oral malodor)) OR TS=(malodour)) OR TS=(bad breath)) OR TS=(fedor oris)) | 3018        |
| #3     | #1 and #2                                                                                                             | 42          |

## 3. Embase ovid search strategy

| Search | Query                                                                                                                                                                                          | Items found |
|--------|------------------------------------------------------------------------------------------------------------------------------------------------------------------------------------------------|-------------|
| #1     | ((Probiotic or Probiotic or Probiotic therapy or Probiotic effect or Probiotic treatment) and (halitosis or halitosis or malodor or oral malodor or malodour or bad breath or fedor oris)).af. | 119         |

## 4. Cochrane Central Register of Controlled Trials (CENTRAL) search strategy

| Search | Query                                                        | Items found |
|--------|--------------------------------------------------------------|-------------|
| #1     | MeSH descriptor: [Halitosis] explode all trees               | 236         |
| #2     | (halitosis):ti,ab,kw (Word variations have been searched)    | 573         |
| #3     | (malodor):ti,ab,kw (Word variations have been searched)      | 399         |
| #4     | (oral malodor):ti,ab,kw (Word variations have been searched) | 300         |
| #5     | (malodour):ti,ab,kw (Word variations have been searched)     | 399         |
| #6     | (bad breath):ti,ab,kw (Word variations have been searched)   | 258         |
| #7     | (fedor oris):ti,ab,kw (Word variations have been searched)   | 0           |
| #8     | #1 or #2 or #3 or #4 or #5 or #6 or #7                       | 996         |
| #9     | MeSH descriptor: [Probiotics] explode all trees              | 2571        |



|     |                                                                     |      |
|-----|---------------------------------------------------------------------|------|
| #10 | (Probiotic):ti,ab,kw (Word variations have been searched)           | 8519 |
| #11 | (Probiotic therapy):ti,ab,kw (Word variations have been searched)   | 3834 |
| #12 | (Probiotic effect):ti,ab,kw (Word variations have been searched)    | 6398 |
| #13 | (Probiotic treatment):ti,ab,kw (Word variations have been searched) | 4579 |
| #14 | #9 or #10 or #11 or #12 or #13                                      | 8603 |
| #15 | #8 and #14                                                          | 8    |

### 5. Gray literature in European and Google Scholar

| Search | Query                                                                                                                                                      | Items found |
|--------|------------------------------------------------------------------------------------------------------------------------------------------------------------|-------------|
| #1     | Probiotic OR Probiotic therapy OR Probiotic effect OR Probiotic treatment AND halitosis OR malodor OR oral malodor OR malodour OR bad breath OR fetor oris | 1           |

1  
2  
3  
4  
5  
6  
7  
8  
9  
10  
11  
12  
13  
14  
15  
16  
17  
18  
19  
20  
21  
22  
23  
24  
25  
26  
27  
28  
29  
30  
31  
32  
33  
34  
35  
36  
37  
38  
39  
40  
41  
42  
43  
44  
45  
46  
47  
48  
49  
50  
51  
52  
53  
54  
55  
56  
57  
58  
59  
60

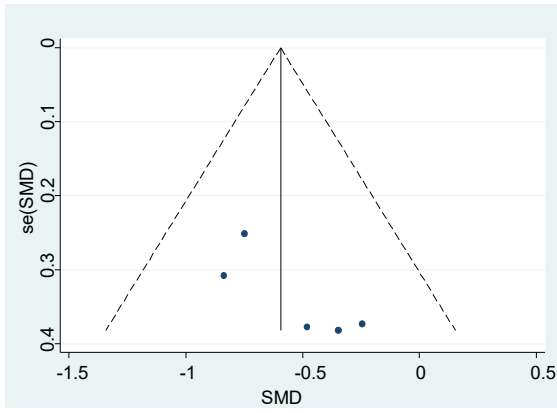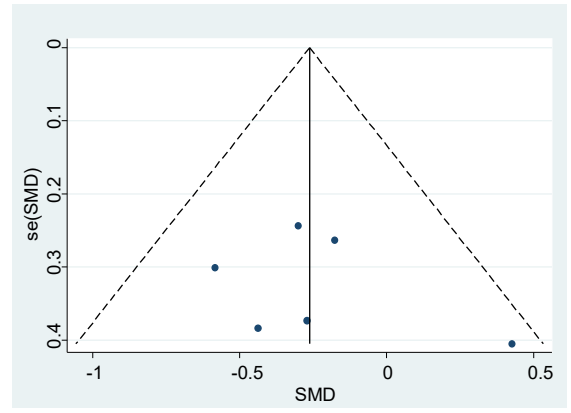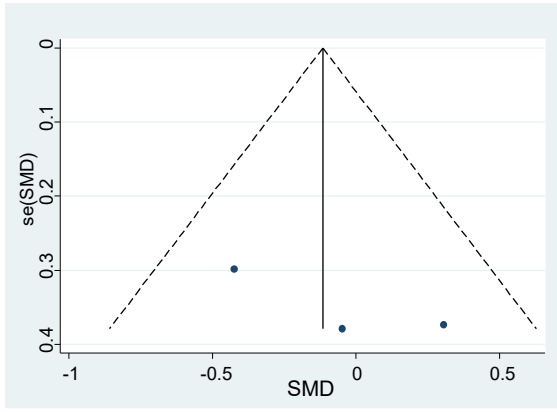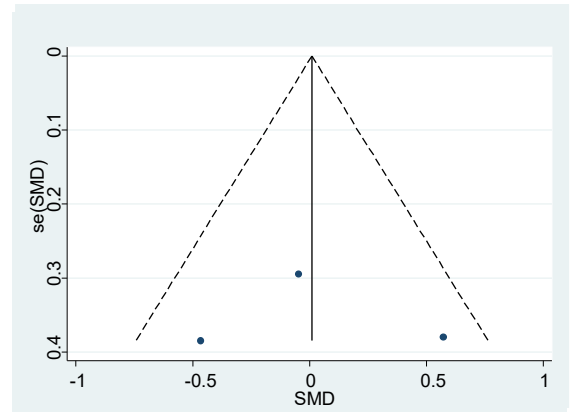

Figure S1: Funnel plot of halitosis parameters in short-term ( $\leq 4$  weeks): (A) OLP scores; (B) VSC concentrations; (C) TCS; (D) PI.

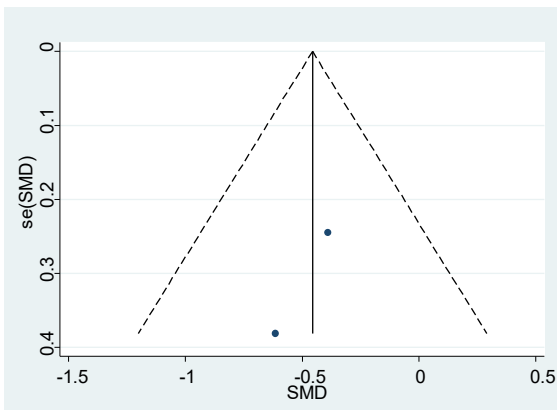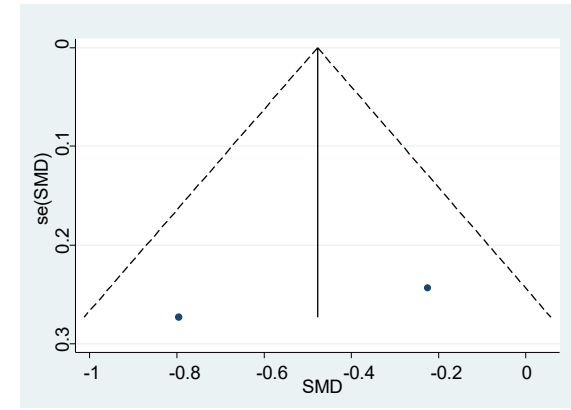

Figure S2: Funnel plot of halitosis parameters in long-term ( $> 4$  weeks): (A) OLP scores; (B) VSC concentrations.

A

1  
2  
3  
4  
5  
6  
7  
8  
9

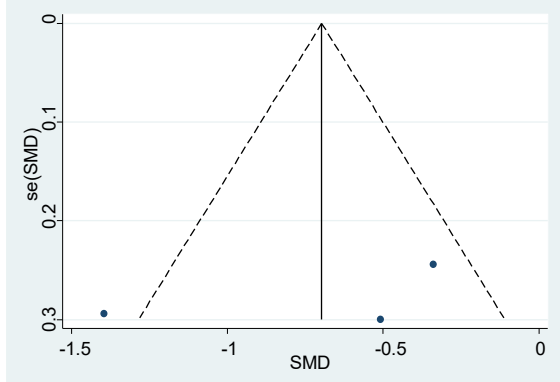

B

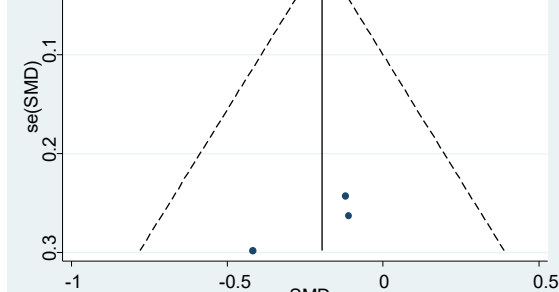

C

12  
13  
14  
15  
16  
17  
18  
19  
20  
21  
22

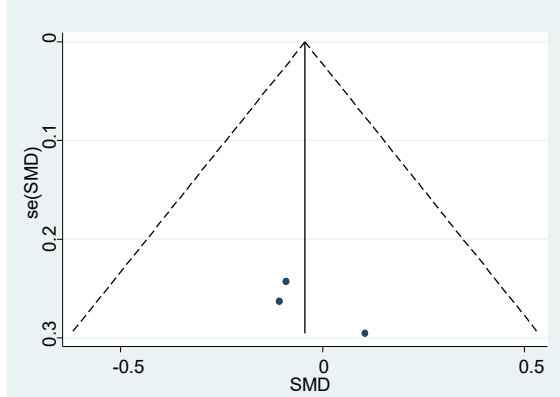

Figure S3: Funnel plot of VSC subgroups in short-term ( $\leq 4$  weeks): (A)  $H_2S$ ; (B)  $CH_3S$ ; (C)  $C_2H_6S$ .

A

30  
31  
32  
33  
34  
35  
36  
37  
38  
39  
40  
41

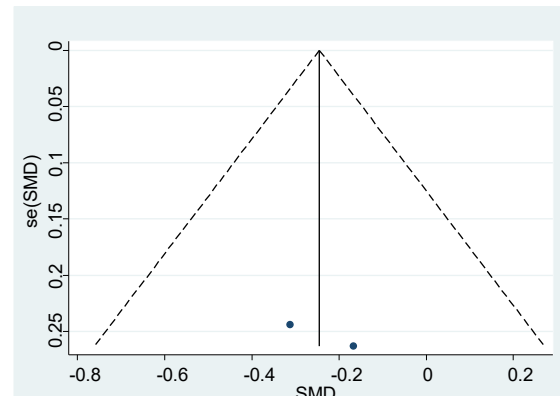

B

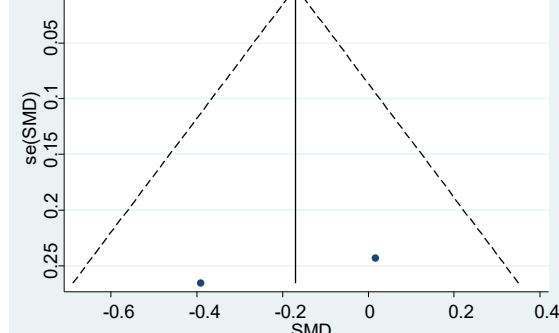

C

44  
45  
46  
47  
48  
49  
50  
51  
52  
53  
54

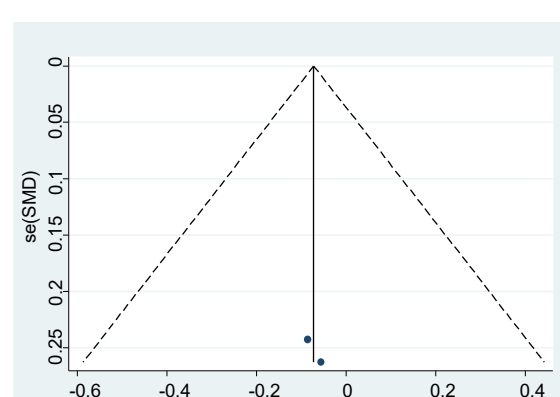

Figure S4: Funnel plot of VSC subgroups in long-term ( $> 4$  weeks): (A)  $H_2S$ ; (B)  $CH_3S$ ; (C)  $C_2H_6S$ .

A

| Egger's test |           |           |       |       |                      |           |
|--------------|-----------|-----------|-------|-------|----------------------|-----------|
| Std_Eff      | Coef.     | Std. Err. | t     | P> t  | [95% Conf. Interval] |           |
| slope        | -1.654658 | .4354301  | -3.80 | 0.032 | -3.04039             | -.2689248 |
| bias         | 3.312431  | 1.341309  | 2.47  | 0.090 | -.9562116            | 7.581074  |

B

| Egger's test |           |           |       |       |                      |          |
|--------------|-----------|-----------|-------|-------|----------------------|----------|
| Std_Eff      | Coef.     | Std. Err. | t     | P> t  | [95% Conf. Interval] |          |
| slope        | -.6982326 | .6453982  | -1.08 | 0.340 | -2.490145            | 1.09368  |
| bias         | 1.432804  | 2.079837  | 0.69  | 0.529 | -4.341748            | 7.207357 |

C

| Egger's test |           |           |       |       |                      |          |
|--------------|-----------|-----------|-------|-------|----------------------|----------|
| Std_Eff      | Coef.     | Std. Err. | t     | P> t  | [95% Conf. Interval] |          |
| slope        | -2.485861 | 1.282746  | -1.94 | 0.303 | -18.7847             | 13.81297 |
| bias         | 6.934603  | 3.728761  | 1.86  | 0.314 | -40.4438             | 54.313   |

D

| Egger's test |           |           |       |       |                      |          |
|--------------|-----------|-----------|-------|-------|----------------------|----------|
| Std_Eff      | Coef.     | Std. Err. | t     | P> t  | [95% Conf. Interval] |          |
| slope        | -.2878511 | 3.056969  | -0.09 | 0.940 | -39.13033            | 38.55463 |
| bias         | .8711259  | 8.860095  | 0.10  | 0.938 | -111.7071            | 113.4493 |

E

| Egger's test |           |           |       |       |                      |          |
|--------------|-----------|-----------|-------|-------|----------------------|----------|
| Std_Eff      | Coef.     | Std. Err. | t     | P> t  | [95% Conf. Interval] |          |
| slope        | 2.223943  | 3.837093  | 0.58  | 0.666 | -46.53094            | 50.97883 |
| bias         | -10.63929 | 13.91572  | -0.76 | 0.584 | -187.4552            | 166.1766 |

F

| Egger's test |           |           |       |       |                      |          |
|--------------|-----------|-----------|-------|-------|----------------------|----------|
| Std_Eff      | Coef.     | Std. Err. | t     | P> t  | [95% Conf. Interval] |          |
| slope        | 1.252312  | .6648476  | 1.88  | 0.311 | -7.195378            | 9.700003 |
| bias         | -5.480127 | 2.507946  | -2.19 | 0.273 | -37.3466             | 26.38635 |

G

| Egger's test |           |           |       |       |                      |          |
|--------------|-----------|-----------|-------|-------|----------------------|----------|
| Std_Eff      | Coef.     | Std. Err. | t     | P> t  | [95% Conf. Interval] |          |
| slope        | -1.041425 | .5483955  | -1.90 | 0.309 | -8.00945             | 5.926601 |
| bias         | 3.788236  | 2.074839  | 1.83  | 0.319 | -22.57509            | 30.15157 |

Figure S5: The result of Egger's test in short-term ( $\leq 4$  weeks): (A) OLP scores; (B) VSC concentrations; (C) TCS; (D) PI; (E) H<sub>2</sub>S; (F) CH<sub>3</sub>S; (G) C<sub>2</sub>H<sub>6</sub>S.

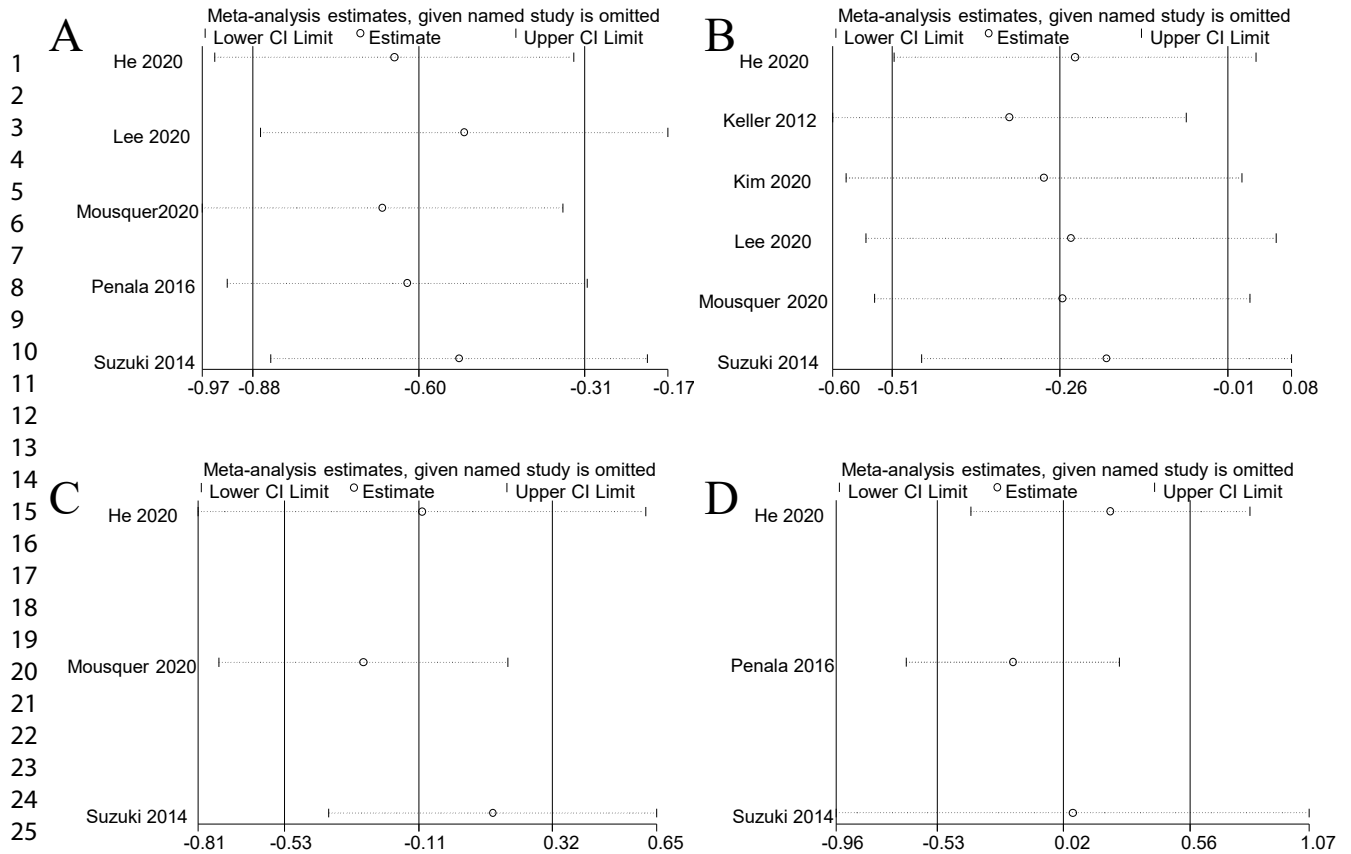

Figure S6: Sensitivity analysis of halitosis parameters in short-term ( $\leq 4$  weeks): (A) OLP scores; (B) VSC concentrations; (C) TCS; (D) PI.

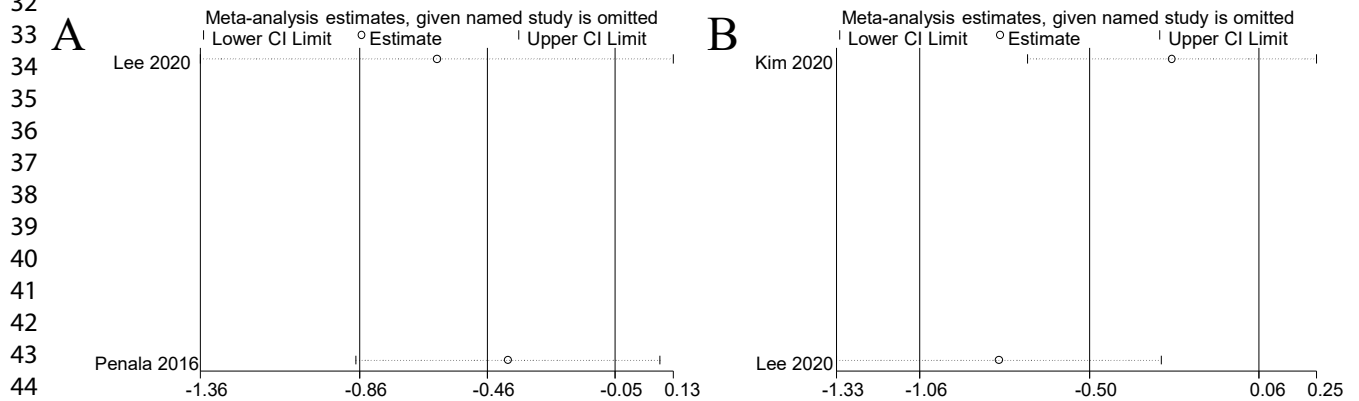

Figure S7: Sensitivity analysis of halitosis parameters in long-term ( $> 4$  weeks): (A) OLP scores; (B) VSC concentrations.

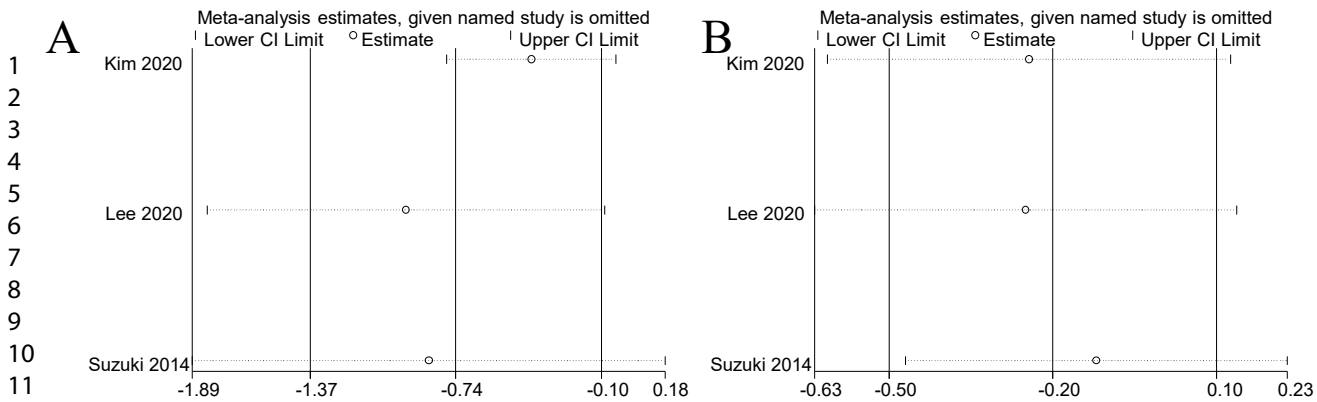

Figure S8: Sensitivity analysis of VSC subgroups in short-term ( $\leq 4$  weeks): (A)  $H_2S$ ; (B)  $CH_3S$ ; (C)  $C_2H_6S$ .

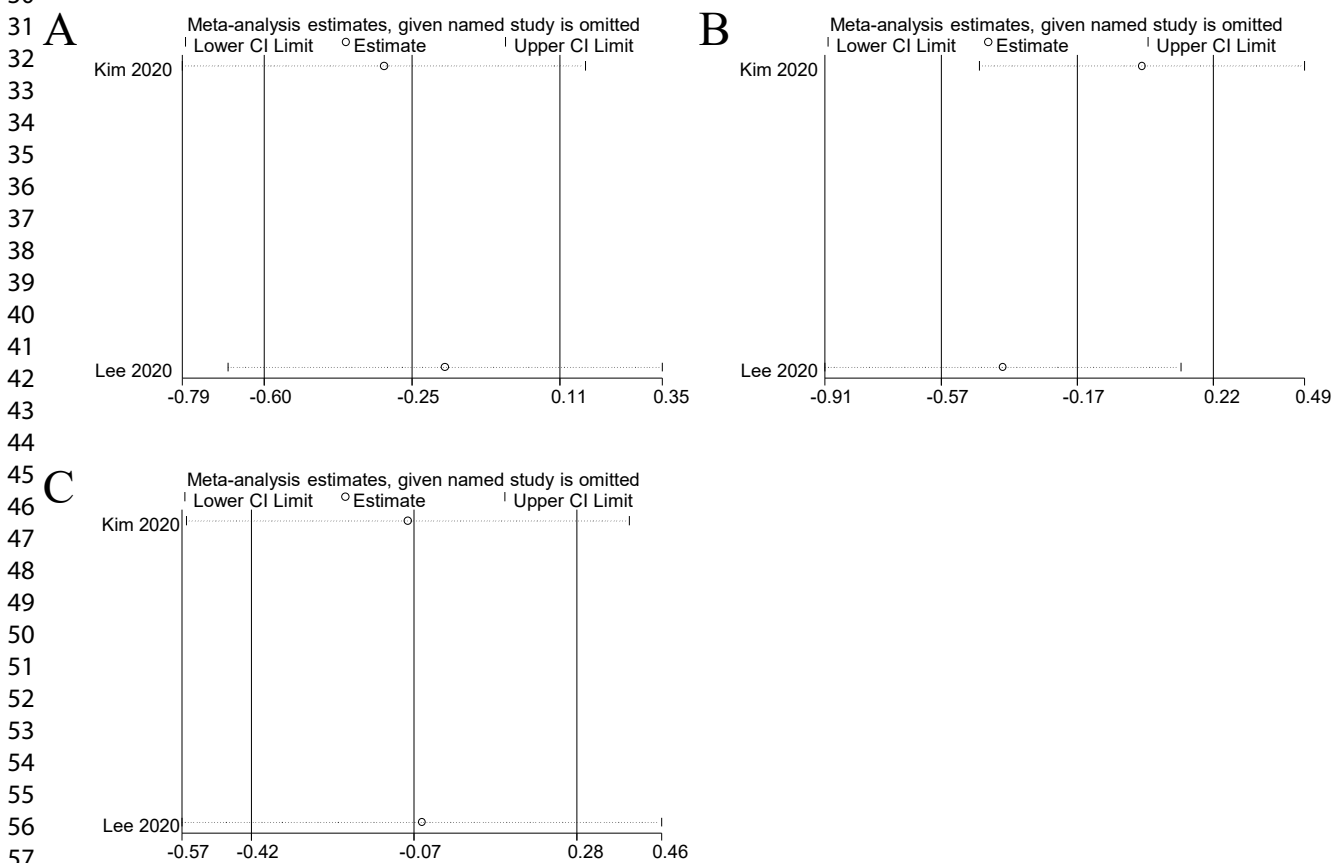

Figure S9: Sensitivity analysis of VSC subgroups in long-term ( $> 4$  weeks): (A)  $H_2S$ ; (B)  $CH_3S$ ; (C)  $C_2H_6S$ .

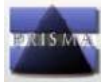

## PRISMA 2020 Checklist

| Section and Topic             | Item # | Checklist item                                                                                                                                                                                                                                                                                       | Location where item is reported |
|-------------------------------|--------|------------------------------------------------------------------------------------------------------------------------------------------------------------------------------------------------------------------------------------------------------------------------------------------------------|---------------------------------|
| <b>TITLE</b>                  |        |                                                                                                                                                                                                                                                                                                      |                                 |
| Title                         | 1      | Identify the report as a systematic review.                                                                                                                                                                                                                                                          | 1                               |
| <b>ABSTRACT</b>               |        |                                                                                                                                                                                                                                                                                                      |                                 |
| Abstract                      | 2      | See the PRISMA 2020 for Abstracts checklist.                                                                                                                                                                                                                                                         | 2                               |
| <b>INTRODUCTION</b>           |        |                                                                                                                                                                                                                                                                                                      |                                 |
| Rationale                     | 3      | Describe the rationale for the review in the context of existing knowledge.                                                                                                                                                                                                                          | 2,3                             |
| Objectives                    | 4      | Provide an explicit statement of the objective(s) or question(s) the review addresses.                                                                                                                                                                                                               | 3                               |
| <b>METHODS</b>                |        |                                                                                                                                                                                                                                                                                                      |                                 |
| Eligibility criteria          | 5      | Specify the inclusion and exclusion criteria for the review and how studies were grouped for the syntheses.                                                                                                                                                                                          | 4                               |
| Information sources           | 6      | Specify all databases, registers, websites, organisations, reference lists and other sources searched or consulted to identify studies. Specify the date when each source was last searched or consulted.                                                                                            | 3                               |
| Search strategy               | 7      | Present the full search strategies for all databases, registers and websites, including any filters and limits used.                                                                                                                                                                                 | 3                               |
| Selection process             | 8      | Specify the methods used to decide whether a study met the inclusion criteria of the review, including how many reviewers screened each record and each report retrieved, whether they worked independently, and if applicable, details of automation tools used in the process.                     | 4                               |
| Data collection process       | 9      | Specify the methods used to collect data from reports, including how many reviewers collected data from each report, whether they worked independently, any processes for obtaining or confirming data from study investigators, and if applicable, details of automation tools used in the process. | 4                               |
| Data items                    | 10a    | List and define all outcomes for which data were sought. Specify whether all results that were compatible with each outcome domain in each study were sought (e.g. for all measures, time points, analyses), and if not, the methods used to decide which results to collect.                        | 4                               |
|                               | 10b    | List and define all other variables for which data were sought (e.g. participant and intervention characteristics, funding sources). Describe any assumptions made about any missing or unclear information.                                                                                         | 4                               |
| Study risk of bias assessment | 11     | Specify the methods used to assess risk of bias in the included studies, including details of the tool(s) used, how many reviewers assessed each study and whether they worked independently, and if applicable, details of automation tools used in the process.                                    | 4                               |
| Effect measures               | 12     | Specify for each outcome the effect measure(s) (e.g. risk ratio, mean difference) used in the synthesis or presentation of results.                                                                                                                                                                  | 4                               |
| Synthesis methods             | 13a    | Describe the processes used to decide which studies were eligible for each synthesis (e.g. tabulating the study intervention characteristics and comparing against the planned groups for each synthesis (item #5)).                                                                                 | 4                               |
|                               | 13b    | Describe any methods required to prepare the data for presentation or synthesis, such as handling of missing summary statistics, or data conversions.                                                                                                                                                | 4                               |
|                               | 13c    | Describe any methods used to tabulate or visually display results of individual studies and syntheses.                                                                                                                                                                                               | 4                               |
|                               | 13d    | Describe any methods used to synthesize results and provide a rationale for the choice(s). If meta-analysis was performed, describe the model(s), method(s) to identify the presence and extent of statistical heterogeneity, and software package(s) used.                                          | 4                               |
|                               | 13e    | Describe any methods used to explore possible causes of heterogeneity among study results (e.g. subgroup analysis, meta-regression).                                                                                                                                                                 | 4                               |
|                               | 13f    | Describe any sensitivity analyses conducted to assess robustness of the synthesized results.                                                                                                                                                                                                         | 4                               |
| Reporting bias assessment     | 14     | Describe any methods used to assess risk of bias due to missing results in a synthesis (arising from reporting biases).                                                                                                                                                                              | 5                               |
| Certainty assessment          | 15     | Describe any methods used to assess certainty (or confidence) in the body of evidence for an outcome.                                                                                                                                                                                                | 5                               |

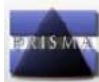

## PRISMA 2020 Checklist

| Section and Topic                              | Item # | Checklist item                                                                                                                                                                                                                                                                       | Location where item is reported |
|------------------------------------------------|--------|--------------------------------------------------------------------------------------------------------------------------------------------------------------------------------------------------------------------------------------------------------------------------------------|---------------------------------|
| <b>RESULTS</b>                                 |        |                                                                                                                                                                                                                                                                                      |                                 |
| Study selection                                | 16a    | Describe the results of the search and selection process, from the number of records identified in the search to the number of studies included in the review, ideally using a flow diagram.                                                                                         | 5                               |
|                                                | 16b    | Cite studies that might appear to meet the inclusion criteria, but which were excluded, and explain why they were excluded.                                                                                                                                                          | 5                               |
| Study characteristics                          | 17     | Cite each included study and present its characteristics.                                                                                                                                                                                                                            | 5                               |
| Risk of bias in studies                        | 18     | Present assessments of risk of bias for each included study.                                                                                                                                                                                                                         | 5                               |
| Results of individual studies                  | 19     | For all outcomes, present, for each study: (a) summary statistics for each group (where appropriate) and (b) an effect estimate and its precision (e.g. confidence/credible interval), ideally using structured tables or plots.                                                     | 5                               |
| Results of syntheses                           | 20a    | For each synthesis, briefly summarise the characteristics and risk of bias among contributing studies.                                                                                                                                                                               | 6                               |
|                                                | 20b    | Present results of all statistical syntheses conducted. If meta-analysis was done, present for each the summary estimate and its precision (e.g. confidence/credible interval) and measures of statistical heterogeneity. If comparing groups, describe the direction of the effect. | 6                               |
|                                                | 20c    | Present results of all investigations of possible causes of heterogeneity among study results.                                                                                                                                                                                       | 6                               |
|                                                | 20d    | Present results of all sensitivity analyses conducted to assess the robustness of the synthesized results.                                                                                                                                                                           | 6                               |
| Reporting biases                               | 21     | Present assessments of risk of bias due to missing results (arising from reporting biases) for each synthesis assessed.                                                                                                                                                              | 6                               |
| Certainty of evidence                          | 22     | Present assessments of certainty (or confidence) in the body of evidence for each outcome assessed.                                                                                                                                                                                  | 6                               |
| <b>DISCUSSION</b>                              |        |                                                                                                                                                                                                                                                                                      |                                 |
| Discussion                                     | 23a    | Provide a general interpretation of the results in the context of other evidence.                                                                                                                                                                                                    | 7                               |
|                                                | 23b    | Discuss any limitations of the evidence included in the review.                                                                                                                                                                                                                      | 7,8                             |
|                                                | 23c    | Discuss any limitations of the review processes used.                                                                                                                                                                                                                                | 7,8                             |
|                                                | 23d    | Discuss implications of the results for practice, policy, and future research.                                                                                                                                                                                                       | 8                               |
| <b>OTHER INFORMATION</b>                       |        |                                                                                                                                                                                                                                                                                      |                                 |
| Registration and protocol                      | 24a    | Provide registration information for the review, including register name and registration number, or state that the review was not registered.                                                                                                                                       | 3                               |
|                                                | 24b    | Indicate where the review protocol can be accessed, or state that a protocol was not prepared.                                                                                                                                                                                       | 3                               |
|                                                | 24c    | Describe and explain any amendments to information provided at registration or in the protocol.                                                                                                                                                                                      | 3                               |
| Support                                        | 25     | Describe sources of financial or non-financial support for the review, and the role of the funders or sponsors in the review.                                                                                                                                                        | 2                               |
| Competing interests                            | 26     | Declare any competing interests of review authors.                                                                                                                                                                                                                                   | 2                               |
| Availability of data, code and other materials | 27     | Report which of the following are publicly available and where they can be found: template data collection forms; data extracted from included studies; data used for all analyses; analytic code; any other materials used in the review.                                           | 4                               |

From: Page MJ, McKenzie JE, Bossuyt PM, Boutron I, Hoffmann TC, Mulrow CD, et al. The PRISMA 2020 statement: an updated guideline for reporting systematic reviews. *BMJ* 2021;372:n71. doi: 10.1136/bmj.n71

For peer review only: <https://www.bmj.com/permissions/permissions.xhtml>



# BMJ Open

## The efficacy of probiotics in the management of halitosis: A systematic review and meta-analysis

|                                 |                                                                                                                                                                                                                                                                                                                                                                                                                                                                                                                                 |
|---------------------------------|---------------------------------------------------------------------------------------------------------------------------------------------------------------------------------------------------------------------------------------------------------------------------------------------------------------------------------------------------------------------------------------------------------------------------------------------------------------------------------------------------------------------------------|
| Journal:                        | <i>BMJ Open</i>                                                                                                                                                                                                                                                                                                                                                                                                                                                                                                                 |
| Manuscript ID                   | bmjopen-2022-060753.R2                                                                                                                                                                                                                                                                                                                                                                                                                                                                                                          |
| Article Type:                   | Original research                                                                                                                                                                                                                                                                                                                                                                                                                                                                                                               |
| Date Submitted by the Author:   | 20-Oct-2022                                                                                                                                                                                                                                                                                                                                                                                                                                                                                                                     |
| Complete List of Authors:       | Huang, Nengwen; Sichuan University, Department of Head and Neck Oncology<br>Li, Jinjin; Sichuan University, Department of Head and Neck Oncology<br>Qiao, Xianghe; Sichuan University, Department of Head and Neck Oncology<br>Wu, Yongzhi; Sichuan University, Department of Head and Neck Oncology<br>Liu, Yunkun; Sichuan University, Department of Head and Neck Oncology<br>Wu, chenzhou; Sichuan University West China Hospital of Stomatology<br>Li, Longjiang; Sichuan University, Department of Head and Neck Oncology |
| <b>Primary Subject Heading</b>: | Dentistry and oral medicine                                                                                                                                                                                                                                                                                                                                                                                                                                                                                                     |
| Secondary Subject Heading:      | Dentistry and oral medicine                                                                                                                                                                                                                                                                                                                                                                                                                                                                                                     |
| Keywords:                       | Microbiology < PATHOLOGY, Infectious diseases & infestations < DERMATOLOGY, Public health < INFECTIOUS DISEASES                                                                                                                                                                                                                                                                                                                                                                                                                 |
|                                 |                                                                                                                                                                                                                                                                                                                                                                                                                                                                                                                                 |

SCHOLARONE™  
Manuscripts



I, the Submitting Author has the right to grant and does grant on behalf of all authors of the Work (as defined in the below author licence), an exclusive licence and/or a non-exclusive licence for contributions from authors who are: i) UK Crown employees; ii) where BMJ has agreed a CC-BY licence shall apply, and/or iii) in accordance with the terms applicable for US Federal Government officers or employees acting as part of their official duties; on a worldwide, perpetual, irrevocable, royalty-free basis to BMJ Publishing Group Ltd ("BMJ") its licensees and where the relevant Journal is co-owned by BMJ to the co-owners of the Journal, to publish the Work in this journal and any other BMJ products and to exploit all rights, as set out in our [licence](#).

The Submitting Author accepts and understands that any supply made under these terms is made by BMJ to the Submitting Author unless you are acting as an employee on behalf of your employer or a postgraduate student of an affiliated institution which is paying any applicable article publishing charge ("APC") for Open Access articles. Where the Submitting Author wishes to make the Work available on an Open Access basis (and intends to pay the relevant APC), the terms of reuse of such Open Access shall be governed by a Creative Commons licence – details of these licences and which [Creative Commons](#) licence will apply to this Work are set out in our licence referred to above.

Other than as permitted in any relevant BMJ Author's Self Archiving Policies, I confirm this Work has not been accepted for publication elsewhere, is not being considered for publication elsewhere and does not duplicate material already published. I confirm all authors consent to publication of this Work and authorise the granting of this licence.

## Title page

**Title:** The efficacy of probiotics in the management of halitosis: A systematic review and meta-analysis  
Nengwen Huang<sup>1\*</sup> Jinjin Li<sup>1\*</sup> Xianghe Qiao<sup>1</sup> Yongzhi Wu<sup>1</sup> Yunkun Liu<sup>1</sup> Chenzhou Wu<sup>1</sup> Longjiang Li<sup>1</sup>  
<sup>1</sup>State Key Laboratory of Oral Diseases, National Clinical Research Center for Oral Diseases,  
Department of Head and Neck Oncology, West China Hospital of Stomatology, Sichuan University,  
Chengdu, China

\* Nengwen Huang and Jinjin Li contributed equally to this paper.

### Corresponding author:

Prof. Longjiang Li

E-mail: [muzili63@163.com](mailto:muzili63@163.com)

**Running title:** Probiotic treatment of halitosis

## ABSTRACT

**Background** Halitosis is defined as a foul odor emitted from the oral cavity. Many interventions have been used to control halitosis from mouthwashes to chewing gums. Probiotics have been reported as an alternative method to alleviate halitosis.

**Objective** The present study aimed to investigate the effect of probiotics on halitosis from a time perspective.

**Design and methods** This is a meta-analysis study performed in indexed databases up to February 2021. Randomized controlled trials were included that compared probiotics and placebo concerning primary outcomes [organoleptic (OLP) scores and volatile sulfur compounds (VSC) levels] and secondary outcomes [tongue coating scores (TCS) and plaque index (PI)]. Data extraction and quality assessment were conducted independently by two reviewers. Publication bias and leave-one-out analyses were performed.

**Results** Standardized mean difference (SMD) and 95% confidence interval (CI) were calculated to synthesize data. The data was sub-grouped and analyzed in the short term ( $\leq 4$  weeks) and long term ( $> 4$  weeks) based on the follow-up time. Seven articles were included in this meta-analysis. Primary outcomes, both OLP scores [SMD = -0.58; 95%CI (-0.87, -0.30),  $p < 0.0001$ ] and VSC levels [SMD = -0.26; 95%CI (-0.51, -0.01),  $p = 0.04$ ], significantly decreased in the probiotics group compared with the placebo group in the short term. However, a significant reduction was observed only in OLP scores [SMD = -0.45; 95%CI (-0.85, -0.04),  $p = 0.03$ ] in the long term. No significant differences were observed in secondary outcomes. There was no evidence of publication bias. The leave-one-out analysis confirmed that the pooled estimate was stable.

**Conclusions** According to the results of this work, it seems that probiotics (e.g., *Lactobacillus salivarius*, *Lactobacillus reuteri*, *Streptococcus salivarius*, and *Weissella cibaria*) may relieve halitosis in the short term ( $\leq 4$  weeks). The results of the biased assessment, limited data, and heterogeneity of clinical trials included might reduce the reliability of the conclusions.

### Strengths and limitations of this study

- 1  
2  
3 39 ▶ This study included larger RCTs involved in halitosis and probiotics.  
4 40 ▶ The results were rationally analyzed from the follow-up time perspective.  
5 41 ▶ Subgroup analysis was done to identify the sources of heterogeneity based on the component of VSC.  
6 42 ▶ The included studies had limited patients.  
7  
8 43 ▶ Some studies reported the outcomes with different forms, increasing the heterogeneity of the results.  
9

## 44 INTRODUCTION

45 Halitosis, also known as “oral malodor,” is typically defined as an unpleasant odor emanating from the  
46 oral cavity.<sup>1</sup> As a cause of patient's referral to the dentist, halitosis is the third most common disease,  
47 only ranking behind dental caries and periodontal disease.<sup>2</sup> According to an epidemiological study, the  
48 prevalence of halitosis is approximately 27.5% in the Chinese population.<sup>3</sup> People have a higher demand  
49 for social interactions and attach more importance to their personal image in today's society. Halitosis  
50 has a significant impact on both patients' daily work and social activities and may even result in frequent  
51 psychological problems such as anxiety, depression, and social isolation.<sup>4</sup> Clinically, halitosis is  
52 categorized into genuine halitosis, pseudo-halitosis, and halitophobia.<sup>5</sup> The latter two types are related  
53 to psychological conditions. Only genuine halitosis is caused by pathological and physiological factors.  
54 It includes intraoral halitosis (IOH) and extraoral halitosis, with the former accounting for 80-90% of  
55 the cases.<sup>6</sup>

56 The main etiologic factor of genuine halitosis is the volatile sulfur compounds (VSC) produced by  
57 oral bacteria via complex microbe–substrate and microbe-microbe interactions and putrefaction of  
58 organic substrates in the oral cavity, associated with poor oral hygiene, tongue coating, and periodontal  
59 disease.<sup>7-10</sup> In particular, hydrogen sulfide (H<sub>2</sub>S), methyl mercaptan (CH<sub>3</sub>SH), and dimethyl sulphide  
60 (C<sub>2</sub>H<sub>6</sub>S) are considered significant parameters and markers of halitosis.<sup>11</sup> Some microorganisms, such  
61 as *Fusobacterium. nucleatum*, *Porphyromonas. gingivalis*, *Prevotella. intermedia*, *Prevotella.*  
62 *nigrescens*, and *Treponema. Denticola*, not only do participate in periodontal diseases, but they also  
63 may facilitate the production of VSC metabolism.<sup>12</sup> Some studies using 16S rRNA amplicon sequencing  
64 and GC-MS-based metabolite profiling found that the bacterial composition, diversity, and metabolites  
65 of the halitosis group were different from those of the control group.<sup>13 14</sup> Therefore, the anaerobic oral  
66 condition might play an important role in the development of halitosis. Consequently, regulating the  
67 balance of the oral microbiota to reduce VSC levels is an important method to manage oral malodor.

68 The current treatments for halitosis include mechanical cleaning (scaling and tongue scraping) and  
69 chemical therapy (antibiotics, mouthwashes, and other agents).<sup>15 16</sup> However, mechanical therapy is  
70 often uncomfortable, even if carried out by the dentist. In addition, although chemical therapy is  
71 generally effective for a short time, it is always associated with various side effects, including the  
72 emergence of dysbacteriosis and staining of the tongue and tooth.<sup>17-20</sup> Consequently, new methods with  
73 fewer side effects are constantly suggested to inhibit oral malodor.

74 As live microorganisms, probiotics confer benefits to the host when administered in appropriate  
75 amounts.<sup>21</sup> Their beneficial effects are primarily related to regulating the local microenvironment  
76 through the prevention of adhesion of pathogens and inhibition of growth of pathogens through the  
77 production of bacteriocins.<sup>22 23</sup> Recently, probiotics like *Lactobacillus reuteri* and *Bifidobacteria* have been  
78 widely used in the oral field.<sup>24</sup> There is a growing body of evidence that the administration of probiotics  
79 might affect the composition of oral biofilms. They have also been investigated in the treatment of

1  
2  
3 80 periodontal<sup>25 26</sup> and peri-implant diseases,<sup>27 28</sup> caries,<sup>29</sup> oral candidiasis<sup>30 31</sup>, and oral mucositis induced by  
4 81 chemo-radiotherapy.<sup>32</sup> Meanwhile, probiotics have also been reported as an alternative strategy to relieve  
5 82 oral malodor.<sup>33-37</sup> However, a previous systematic review showed that probiotic therapy for oral malodor  
6 83 is associated with insufficient evidence for its recommendation.<sup>38</sup> Thus, it is necessary to carry out a  
7 84 focused analysis of the therapeutic effects of probiotics in the treatment of halitosis.

8 85 Therefore, this systematic review and meta-analysis was undertaken to investigate the effect of  
9 86 probiotics in managing halitosis from a time perspective to provide some evidence for the  
10 87 administration of probiotics in this field.

## 15 88 **METHODS**

### 19 89 **Patient and public involvement**

20 90 No patient was involved in the study.  
21 91

### 25 92 **Study design**

26 93 This systematic review was based on the recommendations of the Preferred Reporting Items for  
27 94 Systematic Reviews and Meta-Analyses (PRISMA) guidelines and registered in the PROSPERO  
28 95 (CRD42021227504).<sup>39</sup> According to the PICOS principle, the following focused question was  
29 96 structured: What is the clinical efficacy of probiotics in patients with halitosis when compared with  
30 97 placebo treatment? To answer our research question, we selected clinical trials according to the  
31 98 following study inclusion and exclusion criteria.

### 36 99 **Search strategy**

37 100 A critical electronic search was conducted in the bibliographic databases, mainly including PubMed,  
38 101 EMBASE, Web of Science, and Cochrane Central Register of Controlled Trials up to and including  
39 102 February 2021 to select the published literature. Additionally, gray literature was searched in the  
40 103 database System for Information on Gray literature in European and Google Scholar. The reference lists  
41 104 of the included articles and some related Chinese journals (the Chinese Journal of Stomatology, West  
42 105 China Journal of Stomatology, Journal of Oral Science Research, Journal of Practical Stomatology)  
43 106 were also searched manually. There was no language restriction.

44 107 An initial search strategy was conducted in PubMed with the combination of Medical Subject  
45 108 Headings (Mesh) terms identified by an asterisk symbol (\*) and free text words as follows: Probiotic  
46 109 OR Probiotic\* OR Probiotic therapy OR Probiotic effect OR Probiotic treatment AND halitosis OR  
47 110 halitosis \* OR malodor OR oral malodor OR malodour OR bad breath OR fetor oris. The detailed search  
48 111 strategy for each database was mentioned in supplemental file 1. Endnote X7 was used for electronic title  
49 112 management. First, primary screening was performed independently by two reviewers (NWH and JJJ)  
50 113 based on the titles and abstracts. Then, the full-text articles were used to assess the eligibility further.  
51 114 Any disagreement was solved by consulting a third reviewer.

## 115 **Study inclusion and exclusion criteria**

116 The populations were patients diagnosed with halitosis. The intervention was probiotic therapy,  
117 representing the experiment group. The control group was done with a placebo treatment. The considered  
118 outcomes were halitosis parameters and other indexes before and after treatment. During the first stage  
119 of the study selection, studies meeting the following conditions were considered eligible for this review:  
120 1) study types: randomized controlled clinical trials (RCTs) or randomized controlled cross-over studies;  
121 2) participants: systemically healthy patients diagnosed with halitosis via accepted standards (the  
122 organoleptic (OLP) scores and/or the concentrations of VSC); 3) interventions: evaluating the efficacy  
123 of probiotics with placebo, regardless of the probiotics species and the consumption method; 4) control  
124 interventions: placebo treatment; 5) clinical data: the measurement values, including halitosis  
125 parameters and other indexes before and after treatment. At the second stage of the selection, eligible  
126 studies acquired in the first stage were identified according to the following exclusion criteria: 1) *in*  
127 *vitro* and animal studies, letter to the editor, review articles, interviews, and meta-analyses; 2) unclear  
128 halitosis identification; 3) studies with no completed data obtained even by contacting the authors. 4)  
129 interventions included other measures (e.g., studies comparing tongue scraping plus chlorhexidine plus  
130 probiotics and tongue scraping plus chlorhexidine).<sup>34</sup>

## 131 **Halitosis assessment**

132 The primary outcomes were evaluated for OLP scores and the VSC concentration levels. OLP scores  
133 reflecting subjective perception were often treated as the gold standard for diagnosing halitosis  
134 clinically and in research.<sup>40 41</sup> The OLP scores were estimated by two or three evaluators (with training  
135 and experience in calibrating tests). Subjects closed their mouth for 1 min and then exhaled slowly from  
136 their mouth into the evaluator's nose at a distance of 10 cm. The score was evaluated according to a  
137 six-point '0–5' scale (Rosenberg scale).<sup>42</sup>

138 The VSC concentrations measurement is an objective method through using the Halimeter or Oral  
139 Chroma with no significant difference.<sup>43</sup> Compared with organoleptic evaluation, VSC concentrations  
140 measurement is a quantitative variable with high sensitivity and reproducibility.<sup>44-46</sup> Subjects had to  
141 keep their mouth closed and stop talking for 5 min before measurements. Halimeter: a beverage straw  
142 (fixed and attached to the device) was inserted into the subject's mouth, located at the back of the tongue  
143 dorsum. Subjects should keep their mouth slightly open and breathe through the nose. Oral Chroma:  
144 subjects were asked to keep their mouths closed for 30 s with an air-tight syringe. Then, 1 mL of mouth  
145 air was extracted from the subject and injected into Oral Chroma to measure the VSC concentration.<sup>47</sup>  
146 Then the mean of the results given by the evaluators or machines was used.

## 147 **Risk of bias**

148 The included studies underwent a quality assessment with the Revised Cochrane risk of bias tool for  
149 randomized trials (RoB2).<sup>48</sup> This tool assesses the risk of bias in five domain areas, including  
150 randomization process, deviations from intended interventions, missing outcome data, measurement of  
151 outcome, and selection of the reported result. Each domain assessed bias following several signaling  
152 questions. The overall bias was classified as a high risk of bias, some concerns, or a low risk of bias  
153 determined by a validated algorithm. After screening the articles, two reviewers (NWH and JJJ)  
154 conducted the assessment independently to reach an agreement.

## 155 **Data extraction**

156 Data was extracted with a researcher-designed data form with the following information: 1) basic  
157 information of the included studies (first author's name and the year of publication); 2) study type  
158 (RCT); 3) diagnostic criteria for halitosis; 4) characteristics of the participants (sample volume, the age  
159 range); 5) treatment (probiotic administration, including the type of bacteria, vehicles, doses, and  
160 frequencies); 6) clinical parameters (including the primary and secondary outcomes of final  
161 participants); 7) significance and follow-up periods.

162 Of all these variables, the follow-up periods referred to the duration of probiotic use. If probiotic  
163 treatment ceased during the observation period, only the data before ceasing treatment was included.  
164 Concerning clinical parameters, OLP scores and VSC concentrations were considered the primary  
165 outcomes, directly associated with oral malodor. The secondary outcomes in this review included  
166 tongue coating scores (TCS) and plaque index (PI) because they are commonly regarded as halitosis  
167 causes.

## 168 **Statistical analysis**

169 The statistical analysis was performed with Review Manager 5.3 and Stata 12.0. All the data was group-  
170 analyzed according to the follow-up time. The time  $\leq 4$  weeks was considered the short-term period and  
171 the time  $>4$  weeks was considered the long-term period. In one study with three observation periods,  
172 the values of 4 weeks were analyzed in the short term to keep consistent with other studies.<sup>49</sup> Study  
173 heterogeneity was evaluated using Q statistics and the  $I^2$  test. P value  $<0.10$  was treated as the standard  
174 test. When  $I^2 >50\%$  or p value  $<0.10$ , there was significant heterogeneity between the studies.<sup>50-52</sup> Then,  
175 subgroup analysis and sensitivity analysis were performed to analyze the sources of heterogeneity. The  
176 continuous data on the halitosis parameters of the present studies were expressed with the standardized  
177 mean difference (SMD) and 95% CI (confidence interval). A random-effect model was used for analysis.  
178 Therefore, the mean difference and standard deviation had to be acquired. If the original text did not  
179 provide the related data, the mean difference could be calculated, and the standard deviation was  
180 obtained with the formula ( $r_d = \sqrt{r_1^2/n_1 + r_2^2/n_2}$ ). The excel sheets in the articles were used to convert  
181 the values when provided with median and interquartile.<sup>53 54</sup> Publication bias was performed  
182 subjectively by funnel plots and objectively by Egger's tests. In Egger's test, p value  $<0.05$  indicates  
183 the presence of publication bias.<sup>55</sup> Sensitivity analysis (leave-one-out method) was conducted to assess  
184 the alteration by sequential omission of individual studies.<sup>56</sup>

## 185 **RESULTS**

### 186 **Study selection**

187 In total, 238 articles were potentially identified by electronic and manual searches. After eliminating  
188 the duplicates, 14 articles were included by screening the titles and abstracts. Then, these studies were  
189 evaluated by reading the full texts, and seven articles met the final inclusion criteria (Figure 1).<sup>42 49 57-61</sup>

## 190 Study characteristics

191 Table 1 presents the main characteristics of the included studies. In this review, all the studies were  
 192 randomized control trials. The number of participants in the studies ranged between 23 and 68, with an  
 193 age range of 19 to 70. Halitosis was diagnosed with OLP scores and/or VSC concentrations. The  
 194 probiotics and placebo groups were compared, and the follow-up periods varied from two weeks to 12  
 195 weeks.

196 **Table 1** Characteristics of the included studies.

| Study                  | Type                                                        | Halitosis criterion                            | Subjects Age    | Clinical parameters                                                                               | Probiotics Administration (Vehicle, strains and frequency)                                                                                                                                                         | Follow-up                                |
|------------------------|-------------------------------------------------------------|------------------------------------------------|-----------------|---------------------------------------------------------------------------------------------------|--------------------------------------------------------------------------------------------------------------------------------------------------------------------------------------------------------------------|------------------------------------------|
| Mousquer et al. (2020) | RCT<br>Placebo-double<br>masked, parallel                   | OLP score $\geq$ 1                             | 29<br>$\geq$ 18 | OLP<br>VSC<br>TCS                                                                                 | A gum including 1 billion colony forming units (CFU) Lactobacillus salivarius G60 taken twice per day                                                                                                              | Baseline<br>2 weeks                      |
| Lee et al. (2020)      | RCT<br>Placebo-double<br>blind parallel                     | VSC $\geq$ 1.5ng/10<br>mL                      | 68<br>20-39     | OLP<br>VSC (H <sub>2</sub> S,<br>CH <sub>3</sub> S, C <sub>2</sub> H <sub>6</sub> S)              | An 800-mg tablet contained 1.0 $\times$ 10 <sup>8</sup> CFU/g Weissella cibaria taken once per day                                                                                                                 | Baseline<br>4 weeks<br>8weeks            |
| He et al. (2020)       | RCT<br>Placebo-double<br>blind parallel                     | OLP score $\geq$ 2<br>VSC $\geq$ 150ppb        | 28<br>23-44     | OLP<br>VSC<br>TCS<br>PI                                                                           | A tablet containing 1 $\times$ 10 <sup>9</sup> CFU Streptococcus salivarius K12 taken twice per day                                                                                                                | Baseline<br>4 weeks                      |
| Keller et al. (2012)   | RCT<br>Placebo-double<br>blind cross-over                   | OLP score $>$ 1                                | 25<br>19-25     | OLP<br>VSC                                                                                        | A chewing gum containing Lactobacillus reuteri DSM 17938 and Lactobacillus reuteri ATCC PTA 5289 -both with a concentration of 1 $\times$ 10 <sup>8</sup> CFU taken twice per day                                  | Baseline<br>2 weeks                      |
| Suzuki et al. (2014)   | RCT<br>Double-blind<br>placebo-<br>controlled<br>Cross-over | OLP score $\geq$ 1.5                           | 23<br>22-67     | OLP<br>VSC (H <sub>2</sub> S,<br>CH <sub>3</sub> S, C <sub>2</sub> H <sub>6</sub> S)<br>PI<br>TCS | A tablet containing 6.7 $\times$ 10 <sup>8</sup> CFU Lactobacillus salivarius WB21 and 280mg xylitol taken 3 times per day                                                                                         | Baseline<br>2 weeks                      |
| Penala et al. (2016)   | RCT<br>Placebo-double<br>blind parallel                     | OLP score $>$ 2                                | 29<br>25-59     | OLP<br>PI                                                                                         | A capsule mixture included Lactobacillus salivarius (2 $\times$ 10 <sup>9</sup> CFU) and Lactobacillus reuteri (2 $\times$ 10 <sup>9</sup> CFU) dissolved into 10ml distilled water to rinse for 1min, daily twice | Baseline<br>4 weeks<br>12 weeks          |
| Kim et al. (2020)      | RCT<br>Placebo-double<br>blind parallel                     | OLP score $\geq$ 2<br>VSC $\geq$ 0.15ng/<br>ml | 58<br>20-70     | VSC (H <sub>2</sub> S,<br>CH <sub>3</sub> S, C <sub>2</sub> H <sub>6</sub> S)<br>OLP              | A bag of powder mixture included Weissella. cibaria CMU (1.0 $\times$ 10 <sup>8</sup> CFU) melted in the mouth once per day                                                                                        | Baseline<br>2 weeks<br>4 weeks<br>8weeks |

197 \*RCT: randomized controlled trials; OLP: organoleptic; VSC: volatile sulfur compounds; TCS: tongue coating scores; CFU:  
 198 colony forming units; H<sub>2</sub>S: hydrogen sulfide; CH<sub>3</sub>S: methyl mercaptan; C<sub>2</sub>H<sub>6</sub>S: methanethiol; PI: plaque index

## 199 Risk of bias

200 The bias estimation results showed that one study had a low risk of bias, one had a high risk, and five  
 201 showed some concerns. The reason for a high risk of bias was the incomplete outcome data of the OLP  
 202 scores. Five articles were identified as some concerns because there were many uncertain factors in  
 203 their full texts. Figure 2 presents concrete data on the risk of bias.

204



## 205 Study outcomes

### 206 Primary outcomes

207 Concerning OLP, studies by Keller et al. (2012) and Penala et al. (2016) reported a significant decrease  
208 in the probiotic group compared to the placebo group after treatment ( $p < 0.05$ ).<sup>58 59</sup> In the study by Lee  
209 et al. (2020) involving different follow-up periods, OLP scores decreased significantly in the test groups  
210 at four weeks ( $p = 0.002$ ) but not eight weeks ( $p = 0.188$ ) compared to the baseline.<sup>60</sup> Additionally, the  
211 results of the other four studies indicated that the OLP scores did not differ between the two groups.

212 Concerning VSC, six articles determined VSC concentrations, with three studies detecting the  $p$   
213 values of VSC and subgroups ( $H_2S$ ,  $CH_3SH$ , and  $C_2H_6S$ ).<sup>49 57 60</sup> According to the results, only two  
214 studies<sup>57 60</sup> reported a significant improvement in VSC levels in experimental groups versus placebo  
215 groups.

### 216 Secondary outcomes

217 Concerning TCS, three studies evaluated the changes between the probiotic and placebo groups at four  
218 weeks.<sup>42 57 61</sup> Although a reduced tendency was observed after treatment compared with baseline  $p$   
219 values, there was no significant difference between the two groups.

220 Concerning PI, in the three studies involved,<sup>42 57 59</sup> only one study showed a significant reduction in  
221 PI in the experimental group compared with the controlled group at 12 weeks.<sup>59</sup>

## 222 Quantitative synthesis

223 A meta-analysis was performed including studies with similar clinical parameters of OLP, VSC, TCS,  
224 and PI, according to the follow-up time. Although the detection methods of VSC were different, both  
225 of the devices exhibited similar sensitivity and specificity in the detection of halitosis.<sup>43</sup> Therefore, we  
226 analyzed these values together. Considering the limitations of the included studies and follow-up time,  
227 the pooled estimations of TCS and PI were only performed in the short term.

228 In the short term, the OLP scores significantly decreased in the probiotic group compared to the  
229 control group [SMD = -0.58; 95% CI (-0.87, -0.30),  $p < 0.0001$ ] (Figure 3). A similar result was observed  
230 in VSC [SMD = -0.26; 95% CI (-0.51, -0.01),  $p = 0.04$ ] and  $H_2S$  levels [SMD = -0.73; 95% CI (-1.36, -  
231 0.10),  $p = 0.02$ ]. Other items (TCS, PI,  $CH_3S$ , and  $C_2H_6S$ ) were not significantly different between the  
232 experimental and control groups. The heterogeneity of each outcome was low ( $I^2 < 50\%$ ) except for  $H_2S$   
233 levels ( $I^2 = 75\%$ ) (Figures 3 and 4).

234 In the long term, there was a significant improvement in OLP scores in the experimental group [SMD  
235 = -0.45; 95% CI (-0.85, -0.04),  $p = 0.03$ ] (Figure 5). The results failed to show a significant difference in  
236 VSC concentrations and their subgroups levels (Figures 5 and 6). The heterogeneity of VSC  
237 concentrations was substantial ( $I^2 = 58\%$ ).

## 238 Publication bias

239 In this systematic review and meta-analysis, we found no evidence of publication bias by the result of  
240 the funnel plots and Egger's tests ( $p > 0.05$ ) (supplementary file 2-Figures S1-S5).

## 241 Sensitivity analysis

242 Sensitivity analysis (leave-one-out method) revealed no significant change in the pooled estimation  
243 when excluding any individual study (supplementary file 2-Figures S6-S9).

244

## 245 DISCUSSION

### 246 Summary of the findings

247 This meta-analysis demonstrated that probiotics significantly reduced the OLP scores compared with  
248 the placebo group regardless of the duration of observation, confirming the benefits of probiotics for  
249 halitosis treatment. The probiotics group exhibited a significant reduction in VSC concentrations in the  
250 short term ( $\leq 4$  weeks), with no noticeable difference in the long term ( $> 4$  weeks). Meta-analyses were  
251 also performed in the subgroups of  $\text{H}_2\text{S}$ ,  $\text{CH}_3\text{SH}$ , and  $\text{C}_2\text{H}_6\text{S}$  to assess the concrete difference in VSC  
252 levels. The results showed that only  $\text{H}_2\text{S}$  levels reduced noticeably in the short term when the probiotic  
253 treatment was administered. As for TCS and PI, the results showed no significant differences between  
254 the experimental and placebo groups in the short term. There was no evidence of publication bias. The  
255 sensitivity analysis confirmed that the pooled estimate was stable.

### 256 Outcomes comparison and possible mechanisms

257 Concerning the primary outcomes, in the included articles, the pooled estimation of OLP scores and  
258 VSC concentrations were in favor of probiotic therapy rather than placebo in the short term.<sup>42 49 57-59 61</sup>  
259 The biological mechanisms may be related to the interaction between probiotics and oral microbiota.  
260 According to present studies, probiotic therapy reduces odorous compound levels by inhibiting the  
261 decomposition of amino acids and proteins by anaerobic bacteria.<sup>7 62</sup> The significantly lower VSC  
262 levels under probiotic treatment in the short term might indicate a decrease in anaerobic bacteria activity.  
263 In contrast to our findings, a previous study indicated that it could not confirm the effect of probiotics  
264 on reducing VSC in the short term.<sup>38</sup> The number of included articles may result in this difference.  
265 However, when comes to the results in the long term, only OLP scores showed a significant reduction  
266 rather than VSC concentrations. Oral microbiota contains not only VSC-producing bacteria but also  
267 other bacteria capable of producing other oral malodor compounds (e.g., indoles, skatole, pyridine,  
268 picolines, and polyamines).<sup>63</sup> The underlying mechanisms of the difference may result from the  
269 variation and abundance of microbiota community over time, which in turn affects the efficacy of  
270 probiotics, especially VSC concentration levels.<sup>35 49 61</sup> Therefore, no significant effect on VSC  
271 concentrations in the long term may be due to probiotics' inhibition effect on those other bacteria.  
272 Therefore, the data about microorganisms changing in different periods are significant for the evaluation  
273 of probiotic effects. However, from the present studies, insufficient data in the included studies, the  
274 differences in detection methods, bacterial species, and heterogeneity of clinical trials limited the  
275 microorganism statistical analysis in this review.

276 Meanwhile, we found that the short-term outcome of  $\text{H}_2\text{S}$  concentration change other than  $\text{CH}_3\text{SH}$ ,  
277 and  $\text{C}_2\text{H}_6\text{S}$  was consistent with the total VSC levels. This might be related to differences in the function  
278 of probiotics and in the number and species of bacteria associated with each VSC reduction.<sup>12 35 64</sup>

279 Additionally, the regular VSC measurement device was reported to be more sensitive towards H<sub>2</sub>S than  
280 CH<sub>3</sub>SH and C<sub>2</sub>H<sub>6</sub>S,<sup>46</sup> which may also account for the above result.

281 Regarding the secondary outcomes, based on the present meta-analysis, there was no significant  
282 difference between the experimental and placebo groups on secondary outcomes during the observation  
283 time. The possible reason was the short observation time in the included studies, as one study included  
284 in the analysis showed a significant improvement in PI at 12 weeks.<sup>59</sup> Tongue coating and periodontitis  
285 are often regarded as the leading causes of halitosis.<sup>42 65</sup> However, in an original article, the TCS and  
286 PI showed a pronounced decline after using probiotics compared with the baseline, with no decrease in  
287 the placebo group.<sup>61</sup> This phenomenon might be related to the type of probiotics, some of which were  
288 reported to boost salivary flow by interacting with the oral microbiota.<sup>66</sup>

289 From the current studies, there are two main types of studies on the effect of probiotics on halitosis,  
290 one is to observe the effect during continuous use of probiotics and the other is to observe the effect at  
291 follow-up after stopping the use of probiotics. A recently published study indicated that no significance  
292 of probiotic effect was found, different from ours. The reason for the difference may be that this study  
293 analyzed the collected follow-up data after stopping using probiotics for at least 2 weeks.<sup>67</sup> In addition,  
294 OLP, as the gold standard, demonstrated the efficacy of probiotics in managing halitosis. However, the  
295 results of VSC concentration and subgroup analysis in the long term undermined this effect. These  
296 results with various different outcomes showed the inconsistency in this study. According to Bradford-  
297 Hill criteria, there would be less persuasive evidence for causation between the management of halitosis  
298 and probiotics<sup>68</sup>. Therefore, more clinical and systematic studies are needed to explore and verify the  
299 probiotic effect on the management of halitosis in future research.

### 300 **Limitations**

301 There were several limitations in the present study throughout the whole review process. First, although  
302 both electronic and hand searches were conducted in four primary databases, it was impossible to  
303 retrieve all the relevant studies. Second, this study lacked persuasive evidence for causation between  
304 the management of halitosis and probiotics due to the inconsistency of the pooled results. Third, all  
305 included interventions differed in the species of probiotics, the doses and frequencies used, and  
306 administration periods. A subgroup analysis was necessary to evaluate the source of efficacy concerning  
307 the probiotic species, but the small size of the included articles prevented further analysis. All these  
308 factors would inevitably affect the accuracy of outcomes. Fourth, the detection methods of VSC were  
309 different. Although there is no significant difference between them, the combined analysis might still  
310 affect the reliability of the results. Fifth, in some included studies, the primary outcomes were presented  
311 in different forms, such as percentages or range interquartile. Finally, some important parameters,  
312 including the microorganism species and changes, were not presented completely in some articles. The  
313 absence of partial original data or the differences caused by data conversion equally impaired the final  
314 results though many methods were tried to reduce the bias.

### 315 **CONCLUSION**

316 The present systematic review and meta-analysis indicated that probiotics (e.g., *Lactobacillus salivarius*,  
317 *Lactobacillus reuters*, *Streptococcus salivarius*, and *Weissella cibaria*) may ease halitosis by reducing  
318 the VSC concentration levels in the short term, but there is no significant effect on the major cause of  
319 halitosis such as plaque and tongue coating. Considering the heterogeneity of clinical trials included

320 and the small sample size, more high-quality random clinical trials are required in the future to verify  
321 the results and to evidence the efficacy of probiotics in the management of halitosis.

## 322 **Contributors**

323 NWH and JJJ collected and analyzed data, and drafted the manuscript; NWH and XHQ helped with  
324 the literature searching and statistical analysis; YZW and CZW provided help in the literature searching  
325 and figure revises; XHQ and YKL critically reviewed the manuscript. LJJ designed the experiment and  
326 critically reviewed the manuscript. NWH and JJJ contributed equally to this paper. All authors agree  
327 to be accountable for the study.

## 328 **Competing interests**

329 None declared.

## 330 **Ethics approval statement**

331 No applicable.

## 332 **Funding**

333 This work was supported by the National Natural Science Foundation of China, China (Grant No.  
334 81972538)

## 335 **Data availability statement**

336 The data supporting the findings of this study are available from the corresponding author upon  
337 reasonable request.

## 338 **References**

- 339 1. Porter SR, Scully C. Oral malodour (halitosis). *Bmj* 2006;**333**(7569):632-5.
- 340 2. Rayman S, Almas K. Halitosis among racially diverse populations: an update. *Int J Dent Hyg* 2008;**6**(1):2-7.
- 341 3. Liu XN, Shinada K, Chen XC, et al. Oral malodor-related parameters in the Chinese general population. *J Clin*  
342 *Periodontol* 2006;**33**(1):31-6.
- 343 4. Sanz M, Roldán S, Herrera D. Fundamentals of breath malodour. *J Contemp Dent Pract* 2001;**2**(4):1-17.
- 344 5. Yaegaki K, Coil JM. Examination, classification, and treatment of halitosis; clinical perspectives. *J Can Dent*

- 1  
2  
3 345 *Assoc* 2000;**66**(5):257-61.
- 4 346 6. Madhushankari GS, Yamunadevi A, Selvamani M, et al. Halitosis - An overview: Part-I - Classification,  
5 347 etiology, and pathophysiology of halitosis. *J Pharm Bioallied Sci* 2015;**7**(Suppl 2):S339-43.
- 6 348 7. Scully C, Porter S, Greenman J. What to do about halitosis. *Bmj* 1994;**308**(6923):217-8.
- 7 349 8. Silva MF, Cademartori MG, Leite FRM, et al. Is periodontitis associated with halitosis? A systematic review  
8 350 and meta-regression analysis. *J Clin Periodontol* 2017;**44**(10):1003-09.
- 9 351 9. Quirynen M, Dadamio J, Van den Velde S, et al. Characteristics of 2000 patients who visited a halitosis clinic.  
10 352 *J Clin Periodontol* 2009;**36**(11):970-5.
- 11 353 10. Stephen AS, Dhadwal N, Nagala V, et al. Interdental and subgingival microbiota may affect the tongue  
12 354 microbial ecology and oral malodour in health, gingivitis and periodontitis. *J Periodontol Res* 2021;**56**(6):1174-  
13 355 84.
- 14 356 11. Tonzetich J. Production and origin of oral malodor: a review of mechanisms and methods of analysis. *J*  
15 357 *Periodontol* 1977;**48**(1):13-20.
- 16 358 12. Foo LH, Balan P, Pang LM, et al. Role of the oral microbiome, metabolic pathways, and novel diagnostic  
17 359 tools in intra-oral halitosis: a comprehensive update. *Crit Rev Microbiol* 2021;**47**(3):359-75.
- 18 360 13. Ye W, Zhang Y, He M, et al. Relationship of tongue coating microbiome on volatile sulfur compounds in  
19 361 healthy and halitosis adults. *J Breath Res* 2019;**14**(1):016005.
- 20 362 14. Jo JK, Seo SH, Park SE, et al. Identification of Salivary Microorganisms and Metabolites Associated with  
21 363 Halitosis. *Metabolites* 2021;**11**(6).
- 22 364 15. Loesche WJ, Kazor C. Microbiology and treatment of halitosis. *Periodontol* 2000 2002;**28**:256-79.
- 23 365 16. Pham TA, Ueno M, Zaitso T, et al. Clinical trial of oral malodor treatment in patients with periodontal diseases.  
24 366 *J Periodontol Res* 2011;**46**(6):722-9.
- 25 367 17. Costalonga M, Herzberg MC. The oral microbiome and the immunobiology of periodontal disease and caries.  
26 368 *Immunol Lett* 2014;**162**(2 Pt A):22-38.
- 27 369 18. Fedorowicz Z, Aljufairi H, Nasser M, et al. Mouthrinses for the treatment of halitosis. *Cochrane Database*  
28 370 *Syst Rev* 2008(4):Cd006701.
- 29 371 19. Scully C, Greenman J. Halitology (breath odour: aetiopathogenesis and management). *Oral Dis*  
30 372 2012;**18**(4):333-45.
- 31 373 20. van Steenberghe D, Avontroodt P, Peeters W, et al. Effect of different mouthrinses on morning breath. *J*  
32 374 *Periodontol* 2001;**72**(9):1183-91.
- 33 375 21. Guarner F, Perdigon G, Corthier G, et al. Should yoghurt cultures be considered probiotic? *Br J Nutr*  
34 376 2005;**93**(6):783-6.
- 35 377 22. Cosseau C, Devine DA, Dullaghan E, et al. The commensal *Streptococcus salivarius* K12 downregulates the  
36 378 innate immune responses of human epithelial cells and promotes host-microbe homeostasis. *Infect Immun*  
37 379 2008;**76**(9):4163-75.
- 38 380 23. Devine DA, Marsh PD. Prospects for the development of probiotics and prebiotics for oral applications. *J*  
39 381 *Oral Microbiol* 2009;**1**.
- 40 382 24. Gungor OE, Kirzioglu Z, Kivanc M. Probiotics: can they be used to improve oral health? *Benef Microbes*  
41 383 2015;**6**(5):647-56.
- 42 384 25. Vicario M, Santos A, Violant D, et al. Clinical changes in periodontal subjects with the probiotic *Lactobacillus*  
43 385 *reuteri* Prodentis: a preliminary randomized clinical trial. *Acta Odontol Scand* 2013;**71**(3-4):813-9.
- 44 386 26. Vivekananda MR, Vandana KL, Bhat KG. Effect of the probiotic *Lactobacilli reuteri* (Prodentis) in the  
45 387 management of periodontal disease: a preliminary randomized clinical trial. *J Oral Microbiol* 2010;**2**.
- 46 388 27. Flichy-Fernández AJ, Ata-Ali J, Alegre-Domingo T, et al. The effect of orally administered probiotic

- 1  
2  
3 389 Lactobacillus reuteri-containing tablets in peri-implant mucositis: a double-blind randomized controlled trial. *J*  
4 390 *Periodontal Res* 2015;**50**(6):775-85.
- 5  
6 391 28. Alqahtani F, Alshaikh M, Mehmood A, et al. Efficacy of Antibiotic Versus Probiotics As Adjuncts to  
7 392 Mechanical Debridement for the Treatment of Peri-Implant Mucositis. *J Oral Implantol* 2022;**48**(2):99-104.
- 8  
9 393 29. Laleman I, Detaillieur V, Slot DE, et al. Probiotics reduce mutans streptococci counts in humans: a systematic  
10 394 review and meta-analysis. *Clin Oral Investig* 2014;**18**(6):1539-52.
- 11  
12 395 30. Mendonça FH, Santos SS, Faria Ida S, et al. Effects of probiotic bacteria on Candida presence and IgA anti-  
13 396 Candida in the oral cavity of elderly. *Braz Dent J* 2012;**23**(5):534-8.
- 14  
15 397 31. Li D, Li Q, Liu C, et al. Efficacy and safety of probiotics in the treatment of Candida-associated stomatitis.  
16 398 *Mycoses* 2014;**57**(3):141-6.
- 17  
18 399 32. Xia C, Jiang C, Li W, et al. A Phase II Randomized Clinical Trial and Mechanistic Studies Using Improved  
19 400 Probiotics to Prevent Oral Mucositis Induced by Concurrent Radiotherapy and Chemotherapy in Nasopharyngeal  
20 401 Carcinoma. *Front Immunol* 2021;**12**:618150.
- 21  
22 402 33. Burton JP, Chilcott CN, Moore CJ, et al. A preliminary study of the effect of probiotic Streptococcus salivarius  
23 403 K12 on oral malodour parameters. *J Appl Microbiol* 2006;**100**(4):754-64.
- 24  
25 404 34. Jamali Z, Aminabadi NA, Samiei M, et al. Impact of Chlorhexidine Pretreatment Followed by Probiotic  
26 405 Streptococcus salivarius Strain K12 on Halitosis in Children: A Randomised Controlled Clinical Trial. *Oral*  
27 406 *Health Prev Dent* 2016;**14**(4):305-13.
- 28  
29 407 35. Benic GZ, Farella M, Morgan XC, et al. Oral probiotics reduce halitosis in patients wearing orthodontic braces:  
30 408 a randomized, triple-blind, placebo-controlled trial. *J Breath Res* 2019;**13**(3):036010.
- 31  
32 409 36. Gurpinar B, Yildirim G, Kumral TL, et al. A simple method to reduce halitosis; tongue scraping with probiotics.  
33 410 *J Breath Res* 2019;**14**(1):016008.
- 34  
35 411 37. Yoo HJ, Jwa SK, Kim DH, et al. Inhibitory effect of Streptococcus salivarius K12 and M18 on halitosis in  
36 412 vitro. *Clin Exp Dent Res* 2020;**6**(2):207-14.
- 37  
38 413 38. Yoo JI, Shin IS, Jeon JG, et al. The Effect of Probiotics on Halitosis: a Systematic Review and Meta-analysis.  
39 414 *Probiotics Antimicrob Proteins* 2019;**11**(1):150-57.
- 40  
41 415 39. Moher D, Liberati A, Tetzlaff J, et al. Preferred reporting items for systematic reviews and meta-analyses: the  
42 416 PRISMA statement. *PLoS Med* 2009;**6**(7):e1000097.
- 43  
44 417 40. Bollen CM, Beikler T. Halitosis: the multidisciplinary approach. *Int J Oral Sci* 2012;**4**(2):55-63.
- 45  
46 418 41. Erovic Ademovski S, Lingström P, Winkel E, et al. Comparison of different treatment modalities for oral  
47 419 halitosis. *Acta Odontol Scand* 2012;**70**(3):224-33.
- 48  
49 420 42. He L, Yang H, Chen Z, et al. The Effect of Streptococcus salivarius K12 on Halitosis: a Double-Blind,  
50 421 Randomized, Placebo-Controlled Trial. *Probiotics Antimicrob Proteins* 2020;**12**(4):1321-29.
- 51  
52 422 43. Vandekerckhove B, Van den Velde S, De Smit M, et al. Clinical reliability of non-organoleptic oral malodour  
53 423 measurements. *J Clin Periodontol* 2009;**36**(11):964-9.
- 54  
55 424 44. Rosenberg M, Kulkarni GV, Bosy A, et al. Reproducibility and sensitivity of oral malodor measurements with  
56 425 a portable sulphide monitor. *J Dent Res* 1991;**70**(11):1436-40.
- 57  
58 426 45. Seemann R, Duarte da Conceicao M, Filippi A, et al. [Halitosis management by the general dental practitioner-  
59 427 results of an International Consensus Workshop\*]. *Swiss Dent J* 2014;**124**(11):1205-11.
- 60  
428 46. Rosenberg M, Septon I, Eli I, et al. Halitosis measurement by an industrial sulphide monitor. *J Periodontol*  
1991;**62**(8):487-9.
- 430  
431 47. Laleman I, Dadamio J, De Geest S, et al. Instrumental assessment of halitosis for the general dental practitioner.  
432 48. Sterne JAC, Savović J, Page MJ, et al. RoB 2: a revised tool for assessing risk of bias in randomised trials.

- 1  
2  
3 433 *Bmj* 2019;**366**:14898.
- 4 434 49. Kim D-H, Kang M-S, Yeu J-E, et al. Inhibitory effect of the probiotic bacteria, *Weissella cibaria* CMU on  
5 435 halitosis: a randomized placebo-controlled study. *Journal of Korean Academy of Oral Health* 2020;**44**(4):246-52.
- 6 436 50. Higgins JP, Thompson SG. Quantifying heterogeneity in a meta-analysis. *Stat Med* 2002;**21**(11):1539-58.
- 7  
8 437 51. Hedges LV, Vevea JL. Fixed- and random-effects models in meta-analysis. *Psychological Methods*  
9 438 1998;**3**(4):486-504.
- 10 439 52. DerSimonian R, Laird N. Meta-analysis in clinical trials. *Control Clin Trials* 1986;**7**(3):177-88.
- 11 440 53. Wan X, Wang W, Liu J, et al. Estimating the sample mean and standard deviation from the sample size,  
12 441 median, range and/or interquartile range. *BMC Med Res Methodol* 2014;**14**:135.
- 13 442 54. Luo D, Wan X, Liu J, et al. Optimally estimating the sample mean from the sample size, median, mid-range,  
14 443 and/or mid-quartile range. *Stat Methods Med Res* 2018;**27**(6):1785-805.
- 15 444 55. Egger M, Davey Smith G, Schneider M, et al. Bias in meta-analysis detected by a simple, graphical test. *Bmj*  
16 445 1997;**315**(7109):629-34.
- 17 446 56. Patsopoulos NA, Evangelou E, Ioannidis JP. Sensitivity of between-study heterogeneity in meta-analysis:  
18 447 proposed metrics and empirical evaluation. *Int J Epidemiol* 2008;**37**(5):1148-57.
- 19 448 57. Suzuki N, Yoneda M, Tanabe K, et al. Lactobacillus salivarius WB21--containing tablets for the treatment of  
20 449 oral malodor: a double-blind, randomized, placebo-controlled crossover trial. *Oral Surg Oral Med Oral Pathol*  
21 450 *Oral Radiol* 2014;**117**(4):462-70.
- 22 451 58. Keller MK, Bardow A, Jensdottir T, et al. Effect of chewing gums containing the probiotic bacterium  
23 452 *Lactobacillus reuteri* on oral malodour. *Acta Odontol Scand* 2012;**70**(3):246-50.
- 24 453 59. Penala S, Kalakonda B, Pathakota KR, et al. Efficacy of local use of probiotics as an adjunct to scaling and  
25 454 root planing in chronic periodontitis and halitosis: A randomized controlled trial. *J Res Pharm Pract* 2016;**5**(2):86-  
26 455 93.
- 27 456 60. Lee DS, Lee SA, Kim M, et al. Reduction of Halitosis by a Tablet Containing *Weissella cibaria* CMU: A  
28 457 Randomized, Double-Blind, Placebo-Controlled Study. *J Med Food* 2020;**23**(6):649-57.
- 29 458 61. Mousquer CR, Della Bona A, Milani DC, et al. Are *Lactobacillus salivarius* G60 and inulin more efficacious  
30 459 to treat patients with oral halitosis and tongue coating than the probiotic alone and placebo? A randomized clinical  
31 460 trial. *J Periodontol* 2020;**91**(6):775-83.
- 32 461 62. Suzuki N, Yoneda M, Takeshita T, et al. Induction and inhibition of oral malodor. *Mol Oral Microbiol*  
33 462 2019;**34**(3):85-96.
- 34 463 63. Takeshita T, Suzuki N, Nakano Y, et al. Discrimination of the oral microbiota associated with high hydrogen  
35 464 sulfide and methyl mercaptan production. *Sci Rep* 2012;**2**:215.
- 36 465 64. Kleinberg I, Westbay G. Oral malodor. *Crit Rev Oral Biol Med* 1990;**1**(4):247-59.
- 37 466 65. Iatropoulos A, Panis V, Mela E, et al. Changes of volatile sulphur compounds during therapy of a case series  
38 467 of patients with chronic periodontitis and halitosis. *J Clin Periodontol* 2016;**43**(4):359-65.
- 39 468 66. Ferrer MD, López-López A, Nicolescu T, et al. Topic Application of the Probiotic *Streptococcus dentisani*  
40 469 Improves Clinical and Microbiological Parameters Associated With Oral Health. *Front Cell Infect Microbiol*  
41 470 2020;**10**:465.
- 42 471 67. López-Valverde N, López-Valverde A, Macedo de Sousa B, et al. Role of Probiotics in Halitosis of Oral  
43 472 Origin: A Systematic Review and Meta-Analysis of Randomized Clinical Studies. *Front Nutr* 2021;**8**:787908.
- 44 473 68. Hill AB. The environment and disease: association or causation? *Proc R Soc Med* 1965;**58**(5):295-300.
- 45  
46  
47  
48  
49  
50  
51  
52  
53  
54  
55  
56  
57  
58  
59  
60

1  
2  
3 474 **Figure legends**  
4  
5

6 475 Figure 1: Flow diagram of literature search strategy and inclusion, exclusion criteria.

7 476 Figure 2: Quality assessment of the selected studies (the Revised Cochrane risk of bias tool for  
8 477 randomized trials (RoB2)). Green represents low risk of bias, yellow represents some concerns and red  
9 478 represents a high risk of bias.

10 479 Figure 3: Forest plot of halitosis parameters in short-term ( $\leq 4$  weeks): (A) OLP scores; (B) VSC  
11 480 concentrations; (C) TCS; (D) PI.

12 481 Figure 4: Forest plot of VSC subgroups in short-term ( $\leq 4$  weeks): (A) H<sub>2</sub>S; (B) CH<sub>3</sub>S; (C) C<sub>2</sub>H<sub>6</sub>S.

13 482 Figure 5: Forest plot of halitosis parameters in long-term ( $>4$  weeks): (A) OLP scores; (B) VSC  
14 483 concentrations.

15 484 Figure 6: Forest plot of VSC subgroups in long-term ( $>4$  weeks): (A) H<sub>2</sub>S; (B) CH<sub>3</sub>S; (C) C<sub>2</sub>H<sub>6</sub>S.

16 485 Figure S1: Funnel plot of halitosis parameters in short-term ( $\leq 4$  weeks): (A) OLP scores; (B) VSC  
17 486 concentrations; (C) TCS; (D) PI.

18 487 Figure S2: Funnel plot of halitosis parameters in long-term ( $>4$  weeks): (A) OLP scores; (B) VSC  
19 488 concentrations.

20 489 Figure S3: Funnel plot of VSC subgroups in short-term ( $\leq 4$  weeks): (A) H<sub>2</sub>S; (B) CH<sub>3</sub>S; (C) C<sub>2</sub>H<sub>6</sub>S.

21 490 Figure S4: Funnel plot of VSC subgroups in long-term ( $>4$  weeks): (A) H<sub>2</sub>S; (B) CH<sub>3</sub>S; (C) C<sub>2</sub>H<sub>6</sub>S.

22 491 Figure S5: The result of Egger's test in short-term ( $\leq 4$  weeks): (A) OLP scores; (B) VSC concentrations;  
23 492 (C) TCS; (D) PI; (E) H<sub>2</sub>S; (F) CH<sub>3</sub>S; (G) C<sub>2</sub>H<sub>6</sub>S.

24 493 Figure S6: Sensitivity analysis of halitosis parameters in short-term ( $\leq 4$  weeks): (A) OLP scores; (B)  
25 494 VSC concentrations; (C) TCS; (D) PI.

26 495 Figure S7: Sensitivity analysis of halitosis parameters in long-term ( $>4$  weeks): (A) OLP scores; (B)  
27 496 VSC concentrations.

28 497 Figure S8: Sensitivity analysis of VSC subgroups in short-term ( $\leq 4$  weeks): (A) H<sub>2</sub>S; (B) CH<sub>3</sub>S; (C)  
29 498 C<sub>2</sub>H<sub>6</sub>S.

30 499 Figure S9: Sensitivity analysis of VSC subgroups in long-term ( $>4$  weeks): (A) H<sub>2</sub>S; (B) CH<sub>3</sub>S; (C)  
31 500 C<sub>2</sub>H<sub>6</sub>S.  
32 501





Flow diagram of literature search strategy and inclusion, exclusion criteria.

142x118mm (300 x 300 DPI)

| Intention-to-treat | Unique ID | Study ID       | Experimental | Comparator | Outcome              | Weight | D1 | D2 | D3 | D4 | D5 | Overall |
|--------------------|-----------|----------------|--------------|------------|----------------------|--------|----|----|----|----|----|---------|
|                    | 1         | He 2020        | probiotic    | placebo    | halitosis parameters | 1      | +  | !  | +  | +  | !  | !       |
|                    | 2         | Keller 2012    | probiotic    | placebo    | halitosis parameters | 1      | +  | !  | !  | +  | +  | !       |
|                    | 3         | Kim 2020       | probiotic    | placebo    | halitosis parameters | 1      | +  | !  | +  | +  | +  | !       |
|                    | 4         | Lee 2020       | probiotic    | placebo    | halitosis parameters | 1      | +  | !  | +  | +  | +  | !       |
|                    | 5         | Moussaqer 2020 | probiotic    | placebo    | halitosis parameters | 1      | +  | +  | +  | +  | +  | +       |
|                    | 6         | Penala 2016    | probiotic    | placebo    | halitosis parameters | 1      | +  | !  | +  | +  | +  | !       |
|                    | 7         | Suzuki 2014    | probiotic    | placebo    | halitosis parameters | 1      | +  | !  | +  | +  | +  | !       |

+ Low risk  
! Some concerns  
! High risk  
 D1 Randomisation process  
 D2 Deviations from the intended interventions  
 D3 Missing outcome data  
 D4 Measurement of the outcome  
 D5 Selection of the reported result



Quality assessment of the selected studies (the Revised Cochrane risk of bias tool for randomized trials (RoB2)). Green represents low risk of bias, yellow represents some concerns and red represent high risk of bias.

167x93mm (600 x 600 DPI)



Forest plot of halitosis parameters in short-term ( $\leq 4$  weeks): (A) OLP scores; (B) VSC concentrations; (C) TCS; (D) PI.

108x96mm (300 x 300 DPI)



Forest plot of VSC subgroups in short-term ( $\leq 4$  weeks): (A) H<sub>2</sub>S; (B) CH<sub>3</sub>S; (C) C<sub>2</sub>H<sub>6</sub>S.

107x73mm (300 x 300 DPI)



Forest plot of halitosis parameters in long-term (>4 weeks): (A) OLP scores; (B) VSC concentrations.

108x45mm (300 x 300 DPI)



Forest plot of VSC subgroups in long-term (>4 weeks): (A) H<sub>2</sub>S; (B) CH<sub>3</sub>S; (C) C<sub>2</sub>H<sub>6</sub>S.

108x61mm (300 x 300 DPI)

# Supplementary file 1

## 1. PubMed

| Search | Query                                                                                                                                                                                           | Items found |
|--------|-------------------------------------------------------------------------------------------------------------------------------------------------------------------------------------------------|-------------|
| #1     | (((((Probiotic[Text Word]) OR (Probiotic[MeSH Terms])) OR (Probiotic therapy[Text Word])) OR (Probiotic effect[Text Word])) OR (Probiotic treatment[Text Word]))                                | 27215       |
| #2     | (((((halitosis[Text Word]) OR (halitosis[MeSH Terms])) OR (malodor[Text Word])) OR (oral malodor[Text Word])) OR (malodour[Text Word])) OR (bad breath[Text Word])) OR (fedor oris[Text Word])) | 2788        |
| #3     | #1 and #2                                                                                                                                                                                       | 68          |

## 2. Web of science

| Search | Query                                                                                                             | Items found |
|--------|-------------------------------------------------------------------------------------------------------------------|-------------|
| #1     | ((TS=(Probiotic)) OR TS=(Probiotic therapy)) OR TS=(Probiotic effect)) OR TS=(Probiotic treatment)                | 28458       |
| #2     | ((TS=(halitosis)) OR TS=(malodor)) OR TS=(oral malodor)) OR TS=(malodour)) OR TS=(bad breath)) OR TS=(fedor oris) | 3018        |
| #3     | #1 and #2                                                                                                         | 42          |

## 3. Embase ovid search strategy

| Search | Query                                                                                                                                                                                          | Items found |
|--------|------------------------------------------------------------------------------------------------------------------------------------------------------------------------------------------------|-------------|
| #1     | ((Probiotic or Probiotic or Probiotic therapy or Probiotic effect or Probiotic treatment) and (halitosis or halitosis or malodor or oral malodor or malodour or bad breath or fedor oris)).af. | 119         |

## 4. Cochrane Central Register of Controlled Trials (CENTRAL) search strategy

| Search | Query                                                        | Items found |
|--------|--------------------------------------------------------------|-------------|
| #1     | MeSH descriptor: [Halitosis] explode all trees               | 236         |
| #2     | (halitosis):ti,ab,kw (Word variations have been searched)    | 573         |
| #3     | (malodor):ti,ab,kw (Word variations have been searched)      | 399         |
| #4     | (oral malodor):ti,ab,kw (Word variations have been searched) | 300         |
| #5     | (malodour):ti,ab,kw (Word variations have been searched)     | 399         |
| #6     | (bad breath):ti,ab,kw (Word variations have been searched)   | 258         |
| #7     | (fedor oris):ti,ab,kw (Word variations have been searched)   | 0           |
| #8     | #1 or #2 or #3 or #4 or #5 or #6 or #7                       | 996         |
| #9     | MeSH descriptor: [Probiotics] explode all trees              | 2571        |

|     |                                                                     |      |
|-----|---------------------------------------------------------------------|------|
| #10 | (Probiotic):ti,ab,kw (Word variations have been searched)           | 8519 |
| #11 | (Probiotic therapy):ti,ab,kw (Word variations have been searched)   | 3834 |
| #12 | (Probiotic effect):ti,ab,kw (Word variations have been searched)    | 6398 |
| #13 | (Probiotic treatment):ti,ab,kw (Word variations have been searched) | 4579 |
| #14 | #9 or #10 or #11 or #12 or #13                                      | 8603 |
| #15 | #8 and #14                                                          | 8    |

### 5. Gray literature in European and Google Scholar

| Search | Query                                                                                                                                                      | Items found |
|--------|------------------------------------------------------------------------------------------------------------------------------------------------------------|-------------|
| #1     | Probiotic OR Probiotic therapy OR Probiotic effect OR Probiotic treatment AND halitosis OR malodor OR oral malodor OR malodour OR bad breath OR fetor oris | 1           |



1  
2  
3  
4  
5  
6  
7  
8  
9  
10  
11  
12  
13  
14  
15  
16  
17  
18  
19  
20  
21  
22  
23  
24  
25  
26  
27  
28  
29  
30  
31  
32  
33  
34  
35  
36  
37  
38  
39  
40  
41  
42  
43  
44  
45  
46  
47  
48  
49  
50  
51  
52  
53  
54  
55  
56  
57  
58  
59  
60

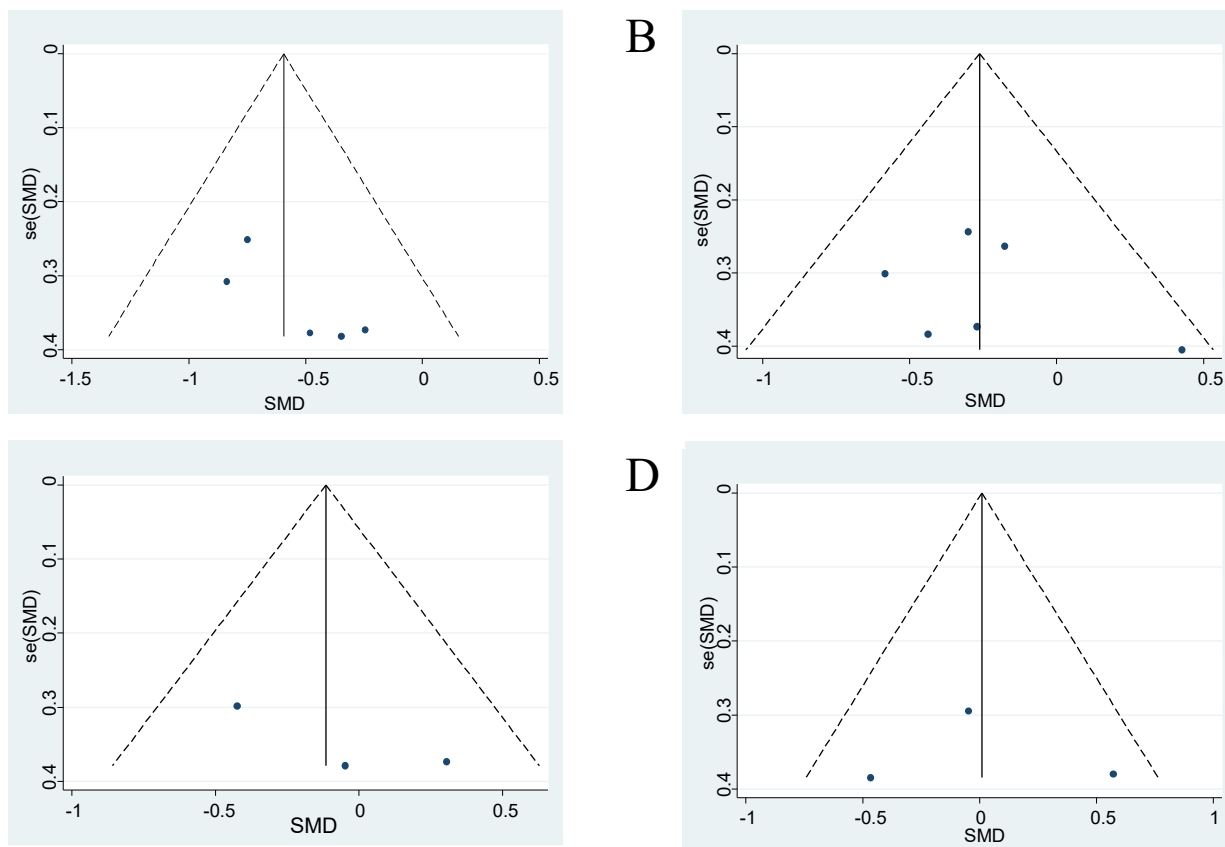

Figure S1: Funnel plot of halitosis parameters in short-term ( $\leq 4$  weeks): (A) OLP scores; (B) VSC concentrations; (C) TCS; (D) PI.

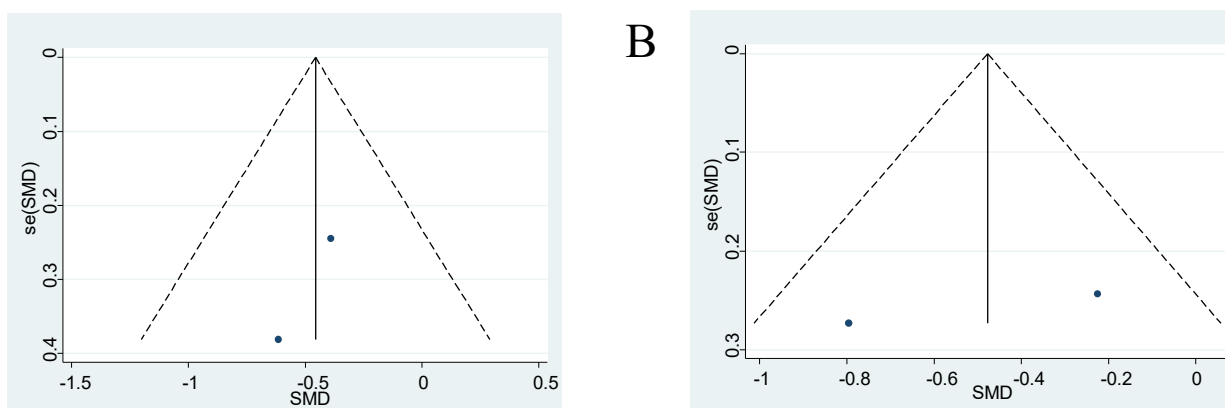

Figure S2: Funnel plot of halitosis parameters in long-term ( $> 4$  weeks): (A) OLP scores; (B) VSC concentrations.

A

B

1  
2  
3  
4  
5  
6  
7  
8  
9

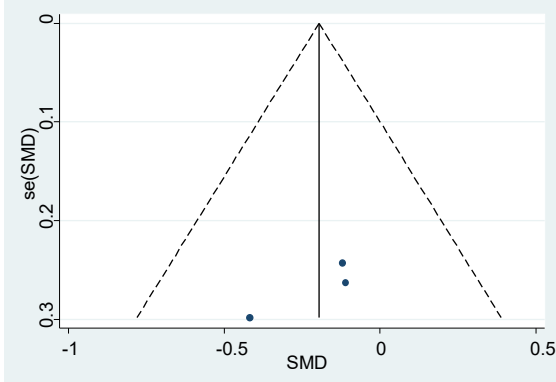

C

12  
13  
14  
15  
16  
17  
18  
19  
20  
21  
22

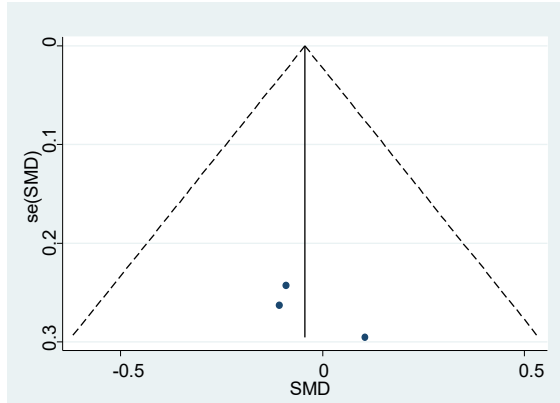

Figure S3: Funnel plot of VSC subgroups in short-term ( $\leq 4$  weeks): (A)  $H_2S$ ; (B)  $CH_3S$ ; (C)  $C_2H_6S$ .

A

B

30  
31  
32  
33  
34  
35  
36  
37  
38  
39  
40  
41

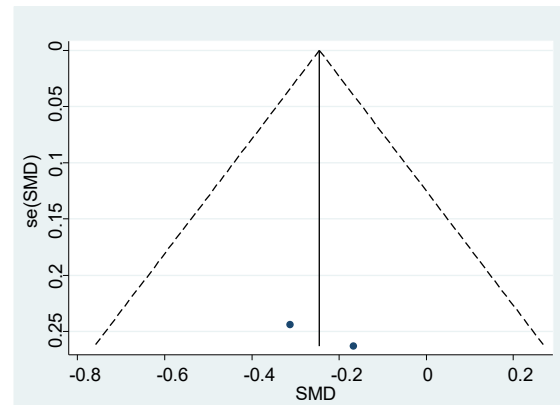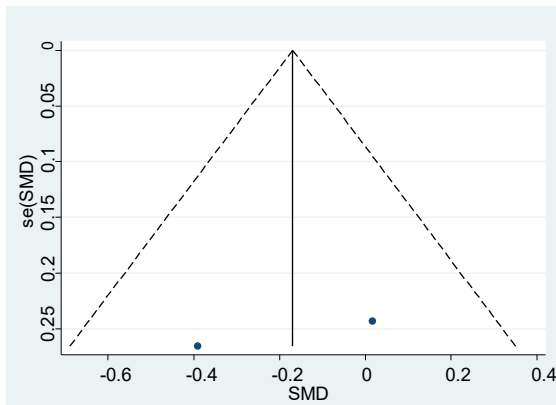

C

44  
45  
46  
47  
48  
49  
50  
51  
52  
53  
54

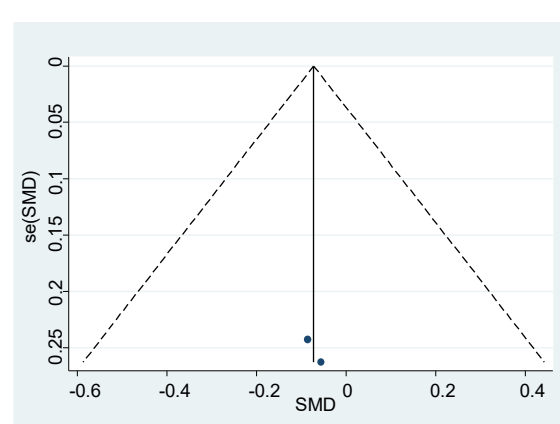

Figure S4: Funnel plot of VSC subgroups in long-term ( $> 4$  weeks): (A)  $H_2S$ ; (B)  $CH_3S$ ; (C)  $C_2H_6S$ .

A

| Egger's test |           |           |       |       |                      |           |
|--------------|-----------|-----------|-------|-------|----------------------|-----------|
| Std_Eff      | Coef.     | Std. Err. | t     | P> t  | [95% Conf. Interval] |           |
| slope        | -1.654658 | .4354301  | -3.80 | 0.032 | -3.04039             | -.2689248 |
| bias         | 3.312431  | 1.341309  | 2.47  | 0.090 | -.9562116            | 7.581074  |

B

| Egger's test |           |           |       |       |                      |          |
|--------------|-----------|-----------|-------|-------|----------------------|----------|
| Std_Eff      | Coef.     | Std. Err. | t     | P> t  | [95% Conf. Interval] |          |
| slope        | -.6982326 | .6453982  | -1.08 | 0.340 | -2.490145            | 1.09368  |
| bias         | 1.432804  | 2.079837  | 0.69  | 0.529 | -4.341748            | 7.207357 |

C

| Egger's test |           |           |       |       |                      |          |
|--------------|-----------|-----------|-------|-------|----------------------|----------|
| Std_Eff      | Coef.     | Std. Err. | t     | P> t  | [95% Conf. Interval] |          |
| slope        | -2.485861 | 1.282746  | -1.94 | 0.303 | -18.7847             | 13.81297 |
| bias         | 6.934603  | 3.728761  | 1.86  | 0.314 | -40.4438             | 54.313   |

D

| Egger's test |           |           |       |       |                      |          |
|--------------|-----------|-----------|-------|-------|----------------------|----------|
| Std_Eff      | Coef.     | Std. Err. | t     | P> t  | [95% Conf. Interval] |          |
| slope        | -.2878511 | 3.056969  | -0.09 | 0.940 | -39.13033            | 38.55463 |
| bias         | .8711259  | 8.860095  | 0.10  | 0.938 | -111.7071            | 113.4493 |

E

| Egger's test |           |           |       |       |                      |          |
|--------------|-----------|-----------|-------|-------|----------------------|----------|
| Std_Eff      | Coef.     | Std. Err. | t     | P> t  | [95% Conf. Interval] |          |
| slope        | 2.223943  | 3.837093  | 0.58  | 0.666 | -46.53094            | 50.97883 |
| bias         | -10.63929 | 13.91572  | -0.76 | 0.584 | -187.4552            | 166.1766 |

F

| Egger's test |           |           |       |       |                      |          |
|--------------|-----------|-----------|-------|-------|----------------------|----------|
| Std_Eff      | Coef.     | Std. Err. | t     | P> t  | [95% Conf. Interval] |          |
| slope        | 1.252312  | .6648476  | 1.88  | 0.311 | -7.195378            | 9.700003 |
| bias         | -5.480127 | 2.507946  | -2.19 | 0.273 | -37.3466             | 26.38635 |

G

| Egger's test |           |           |       |       |                      |          |
|--------------|-----------|-----------|-------|-------|----------------------|----------|
| Std_Eff      | Coef.     | Std. Err. | t     | P> t  | [95% Conf. Interval] |          |
| slope        | -1.041425 | .5483955  | -1.90 | 0.309 | -8.00945             | 5.926601 |
| bias         | 3.788236  | 2.074839  | 1.83  | 0.319 | -22.57509            | 30.15157 |

Figure S5: The result of Egger's test in short-term ( $\leq 4$  weeks): (A) OLP scores; (B) VSC concentrations; (C) TCS; (D) PI; (E) H<sub>2</sub>S; (F) CH<sub>3</sub>S; (G) C<sub>2</sub>H<sub>6</sub>S.



Figure S6: Sensitivity analysis of halitosis parameters in short-term ( $\leq 4$  weeks): (A) OLP scores; (B) VSC concentrations; (C) TCS; (D) PI.



Figure S7: Sensitivity analysis of halitosis parameters in long-term ( $> 4$  weeks): (A) OLP scores; (B) VSC concentrations.



Figure S8: Sensitivity analysis of VSC subgroups in short-term (<=4 weeks): (A) H<sub>2</sub>S; (B) CH<sub>3</sub>S; (C) C<sub>2</sub>H<sub>6</sub>S.



Figure S9: Sensitivity analysis of VSC subgroups in long-term (>4 weeks): (A) H<sub>2</sub>S; (B) CH<sub>3</sub>S; (C) C<sub>2</sub>H<sub>6</sub>S.



## PRISMA 2020 Checklist

| Section and Topic             | Item # | Checklist item                                                                                                                                                                                                                                                                                       | Location where item is reported |
|-------------------------------|--------|------------------------------------------------------------------------------------------------------------------------------------------------------------------------------------------------------------------------------------------------------------------------------------------------------|---------------------------------|
| <b>TITLE</b>                  |        |                                                                                                                                                                                                                                                                                                      |                                 |
| Title                         | 1      | Identify the report as a systematic review.                                                                                                                                                                                                                                                          | 1                               |
| <b>ABSTRACT</b>               |        |                                                                                                                                                                                                                                                                                                      |                                 |
| Abstract                      | 2      | See the PRISMA 2020 for Abstracts checklist.                                                                                                                                                                                                                                                         | 2                               |
| <b>INTRODUCTION</b>           |        |                                                                                                                                                                                                                                                                                                      |                                 |
| Rationale                     | 3      | Describe the rationale for the review in the context of existing knowledge.                                                                                                                                                                                                                          | 2,3                             |
| Objectives                    | 4      | Provide an explicit statement of the objective(s) or question(s) the review addresses.                                                                                                                                                                                                               | 3                               |
| <b>METHODS</b>                |        |                                                                                                                                                                                                                                                                                                      |                                 |
| Eligibility criteria          | 5      | Specify the inclusion and exclusion criteria for the review and how studies were grouped for the syntheses.                                                                                                                                                                                          | 4                               |
| Information sources           | 6      | Specify all databases, registers, websites, organisations, reference lists and other sources searched or consulted to identify studies. Specify the date when each source was last searched or consulted.                                                                                            | 3                               |
| Search strategy               | 7      | Present the full search strategies for all databases, registers and websites, including any filters and limits used.                                                                                                                                                                                 | 3                               |
| Selection process             | 8      | Specify the methods used to decide whether a study met the inclusion criteria of the review, including how many reviewers screened each record and each report retrieved, whether they worked independently, and if applicable, details of automation tools used in the process.                     | 4                               |
| Data collection process       | 9      | Specify the methods used to collect data from reports, including how many reviewers collected data from each report, whether they worked independently, any processes for obtaining or confirming data from study investigators, and if applicable, details of automation tools used in the process. | 4                               |
| Data items                    | 10a    | List and define all outcomes for which data were sought. Specify whether all results that were compatible with each outcome domain in each study were sought (e.g. for all measures, time points, analyses), and if not, the methods used to decide which results to collect.                        | 4                               |
|                               | 10b    | List and define all other variables for which data were sought (e.g. participant and intervention characteristics, funding sources). Describe any assumptions made about any missing or unclear information.                                                                                         | 4                               |
| Study risk of bias assessment | 11     | Specify the methods used to assess risk of bias in the included studies, including details of the tool(s) used, how many reviewers assessed each study and whether they worked independently, and if applicable, details of automation tools used in the process.                                    | 4                               |
| Effect measures               | 12     | Specify for each outcome the effect measure(s) (e.g. risk ratio, mean difference) used in the synthesis or presentation of results.                                                                                                                                                                  | 4                               |
| Synthesis methods             | 13a    | Describe the processes used to decide which studies were eligible for each synthesis (e.g. tabulating the study intervention characteristics and comparing against the planned groups for each synthesis (item #5)).                                                                                 | 4                               |
|                               | 13b    | Describe any methods required to prepare the data for presentation or synthesis, such as handling of missing summary statistics, or data conversions.                                                                                                                                                | 4                               |
|                               | 13c    | Describe any methods used to tabulate or visually display results of individual studies and syntheses.                                                                                                                                                                                               | 4                               |
|                               | 13d    | Describe any methods used to synthesize results and provide a rationale for the choice(s). If meta-analysis was performed, describe the model(s), method(s) to identify the presence and extent of statistical heterogeneity, and software package(s) used.                                          | 4                               |
|                               | 13e    | Describe any methods used to explore possible causes of heterogeneity among study results (e.g. subgroup analysis, meta-regression).                                                                                                                                                                 | 4                               |
|                               | 13f    | Describe any sensitivity analyses conducted to assess robustness of the synthesized results.                                                                                                                                                                                                         | 4                               |
| Reporting bias assessment     | 14     | Describe any methods used to assess risk of bias due to missing results in a synthesis (arising from reporting biases).                                                                                                                                                                              | 5                               |
| Certainty assessment          | 15     | Describe any methods used to assess certainty (or confidence) in the body of evidence for an outcome.                                                                                                                                                                                                | 5                               |



## PRISMA 2020 Checklist

| Section and Topic                              | Item # | Checklist item                                                                                                                                                                                                                                                                       | Location where item is reported |
|------------------------------------------------|--------|--------------------------------------------------------------------------------------------------------------------------------------------------------------------------------------------------------------------------------------------------------------------------------------|---------------------------------|
| <b>RESULTS</b>                                 |        |                                                                                                                                                                                                                                                                                      |                                 |
| Study selection                                | 16a    | Describe the results of the search and selection process, from the number of records identified in the search to the number of studies included in the review, ideally using a flow diagram.                                                                                         | 5                               |
|                                                | 16b    | Cite studies that might appear to meet the inclusion criteria, but which were excluded, and explain why they were excluded.                                                                                                                                                          | 5                               |
| Study characteristics                          | 17     | Cite each included study and present its characteristics.                                                                                                                                                                                                                            | 5                               |
| Risk of bias in studies                        | 18     | Present assessments of risk of bias for each included study.                                                                                                                                                                                                                         | 5                               |
| Results of individual studies                  | 19     | For all outcomes, present, for each study: (a) summary statistics for each group (where appropriate) and (b) an effect estimate and its precision (e.g. confidence/credible interval), ideally using structured tables or plots.                                                     | 5                               |
| Results of syntheses                           | 20a    | For each synthesis, briefly summarise the characteristics and risk of bias among contributing studies.                                                                                                                                                                               | 6                               |
|                                                | 20b    | Present results of all statistical syntheses conducted. If meta-analysis was done, present for each the summary estimate and its precision (e.g. confidence/credible interval) and measures of statistical heterogeneity. If comparing groups, describe the direction of the effect. | 6                               |
|                                                | 20c    | Present results of all investigations of possible causes of heterogeneity among study results.                                                                                                                                                                                       | 6                               |
|                                                | 20d    | Present results of all sensitivity analyses conducted to assess the robustness of the synthesized results.                                                                                                                                                                           | 6                               |
| Reporting biases                               | 21     | Present assessments of risk of bias due to missing results (arising from reporting biases) for each synthesis assessed.                                                                                                                                                              | 6                               |
| Certainty of evidence                          | 22     | Present assessments of certainty (or confidence) in the body of evidence for each outcome assessed.                                                                                                                                                                                  | 6                               |
| <b>DISCUSSION</b>                              |        |                                                                                                                                                                                                                                                                                      |                                 |
| Discussion                                     | 23a    | Provide a general interpretation of the results in the context of other evidence.                                                                                                                                                                                                    | 7                               |
|                                                | 23b    | Discuss any limitations of the evidence included in the review.                                                                                                                                                                                                                      | 7,8                             |
|                                                | 23c    | Discuss any limitations of the review processes used.                                                                                                                                                                                                                                | 7,8                             |
|                                                | 23d    | Discuss implications of the results for practice, policy, and future research.                                                                                                                                                                                                       | 8                               |
| <b>OTHER INFORMATION</b>                       |        |                                                                                                                                                                                                                                                                                      |                                 |
| Registration and protocol                      | 24a    | Provide registration information for the review, including register name and registration number, or state that the review was not registered.                                                                                                                                       | 3                               |
|                                                | 24b    | Indicate where the review protocol can be accessed, or state that a protocol was not prepared.                                                                                                                                                                                       | 3                               |
|                                                | 24c    | Describe and explain any amendments to information provided at registration or in the protocol.                                                                                                                                                                                      | 3                               |
| Support                                        | 25     | Describe sources of financial or non-financial support for the review, and the role of the funders or sponsors in the review.                                                                                                                                                        | 2                               |
| Competing interests                            | 26     | Declare any competing interests of review authors.                                                                                                                                                                                                                                   | 2                               |
| Availability of data, code and other materials | 27     | Report which of the following are publicly available and where they can be found: template data collection forms; data extracted from included studies; data used for all analyses; analytic code; any other materials used in the review.                                           | 4                               |

From: Page MJ, McKenzie JE, Bossuyt PM, Boutron I, Hoffmann TC, Mulrow CD, et al. The PRISMA 2020 statement: an updated guideline for reporting systematic reviews. *BMJ* 2021;372:n71. doi: 10.1136/bmj.n71

For peer review only: <https://www.bmj.com/permissions/permissions.xhtml>
