# Supplementary material for: Efficacy of probiotics in the management of halitosis: a systematic review and meta-analysis
Source: PubMed Central journal article supplement — BMJ Open. 2022 Dec 1;12(12):e060753. doi: 10.1136/bmjopen-2022-060753 (PMC9809225; doi:10.1136/bmjopen-2022-060753), 2022-12-01
Supplement: bmjopen-2022-060753supp001.pdf [file bmjopen-2022-060753supp001.pdf]

## Supplementary file 1

### 1. PubMed

| Search | Query                                                                                                                                                                                           | Items found |
|--------|-------------------------------------------------------------------------------------------------------------------------------------------------------------------------------------------------|-------------|
| #1     | (((((Probiotic[Text Word] OR (Probiotic[MeSH Terms])) OR (Probiotic therapy[Text Word])) OR (Probiotic effect[Text Word])) OR (Probiotic treatment[Text Word])))                                | 27215       |
| #2     | ((((((halitosis[Text Word] OR (halitosis[MeSH Terms])) OR (malodor[Text Word])) OR (oral malodor[Text Word])) OR (malodour[Text Word])) OR (bad breath[Text Word])) OR (fedor oris[Text Word])) | 2788        |
| #3     | #1 and #2                                                                                                                                                                                       | 68          |

### 2. Web of science

| Search | Query                                                                                                               | Items found |
|--------|---------------------------------------------------------------------------------------------------------------------|-------------|
| #1     | ((TS=(Probiotic)) OR TS=(Probiotic therapy)) OR TS=(Probiotic effect) OR TS=(Probiotic treatment)                   | 28458       |
| #2     | ((((TS=(halitosis)) OR TS=(malodor)) OR TS=(oral malodor)) OR TS=(malodour)) OR TS=(bad breath)) OR TS=(fedor oris) | 3018        |
| #3     | #1 and #2                                                                                                           | 42          |

### 3. Embase ovid search strategy

| Search | Query                                                                                                                                                                                          | Items found |
|--------|------------------------------------------------------------------------------------------------------------------------------------------------------------------------------------------------|-------------|
| #1     | ((Probiotic or Probiotic or Probiotic therapy or Probiotic effect or Probiotic treatment) and (halitosis or halitosis or malodor or oral malodor or malodour or bad breath or fedor oris)).af. | 119         |

### 4. Cochrane Central Register of Controlled Trials (CENTRAL) search strategy

| Search | Query                                                        | Items found |
|--------|--------------------------------------------------------------|-------------|
| #1     | MeSH descriptor: [Halitosis] explode all trees               | 236         |
| #2     | (halitosis):ti,ab,kw (Word variations have been searched)    | 573         |
| #3     | (malodor):ti,ab,kw (Word variations have been searched)      | 399         |
| #4     | (oral malodor):ti,ab,kw (Word variations have been searched) | 300         |
| #5     | (malodour):ti,ab,kw (Word variations have been searched)     | 399         |
| #6     | (bad breath):ti,ab,kw (Word variations have been searched)   | 258         |
| #7     | (fedor oris):ti,ab,kw (Word variations have been searched)   | 0           |
| #8     | #1 or #2 or #3 or #4 or #5 or #6 or #7                       | 996         |
| #9     | MeSH descriptor: [Probiotics] explode all trees              | 2571        |

|     |                                                                     |      |
|-----|---------------------------------------------------------------------|------|
| #10 | (Probiotic):ti,ab,kw (Word variations have been searched)           | 8519 |
| #11 | (Probiotic therapy):ti,ab,kw (Word variations have been searched)   | 3834 |
| #12 | (Probiotic effect):ti,ab,kw (Word variations have been searched)    | 6398 |
| #13 | (Probiotic treatment):ti,ab,kw (Word variations have been searched) | 4579 |
| #14 | #9 or #10 or #11 or #12 or #13                                      | 8603 |
| #15 | #8 and #14                                                          | 8    |

#### 5. Gray literature in European and Google Scholar

| Search | Query                                                                                                                                                      | Items found |
|--------|------------------------------------------------------------------------------------------------------------------------------------------------------------|-------------|
| #1     | Probiotic OR Probiotic therapy OR Probiotic effect OR Probiotic treatment AND halitosis OR malodor OR oral malodor OR malodour OR bad breath OR fetor oris | 1           |
