# Supplementary material for: Efficacy of probiotics in the management of halitosis: a systematic review and meta-analysis
Source: PubMed Central journal article supplement — BMJ Open. 2022 Dec 1;12(12):e060753. doi: 10.1136/bmjopen-2022-060753 (PMC9809225; doi:10.1136/bmjopen-2022-060753), 2022-12-01
Supplement: bmjopen-2022-060753supp002.pdf [file bmjopen-2022-060753supp002.pdf]

## Supplementary file 2

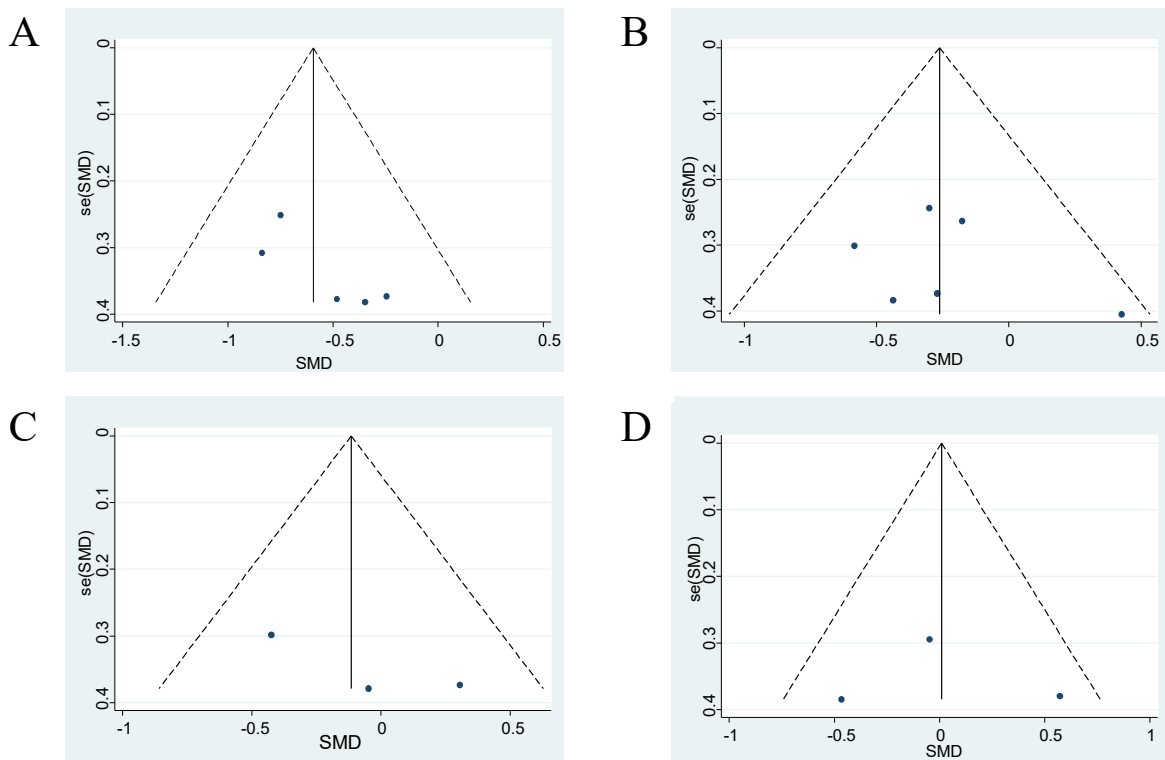

Figure S1: Funnel plot of halitosis parameters in short-term ( $\leq 4$  weeks): (A) OLP scores; (B) VSC concentrations; (C) TCS; (D) PI.

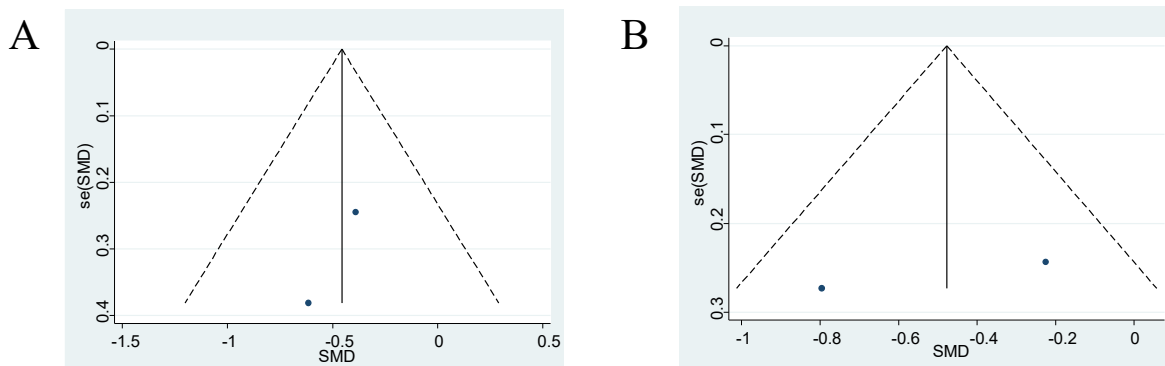

Figure S2: Funnel plot of halitosis parameters in long-term ( $> 4$  weeks): (A) OLP scores; (B) VSC concentrations.

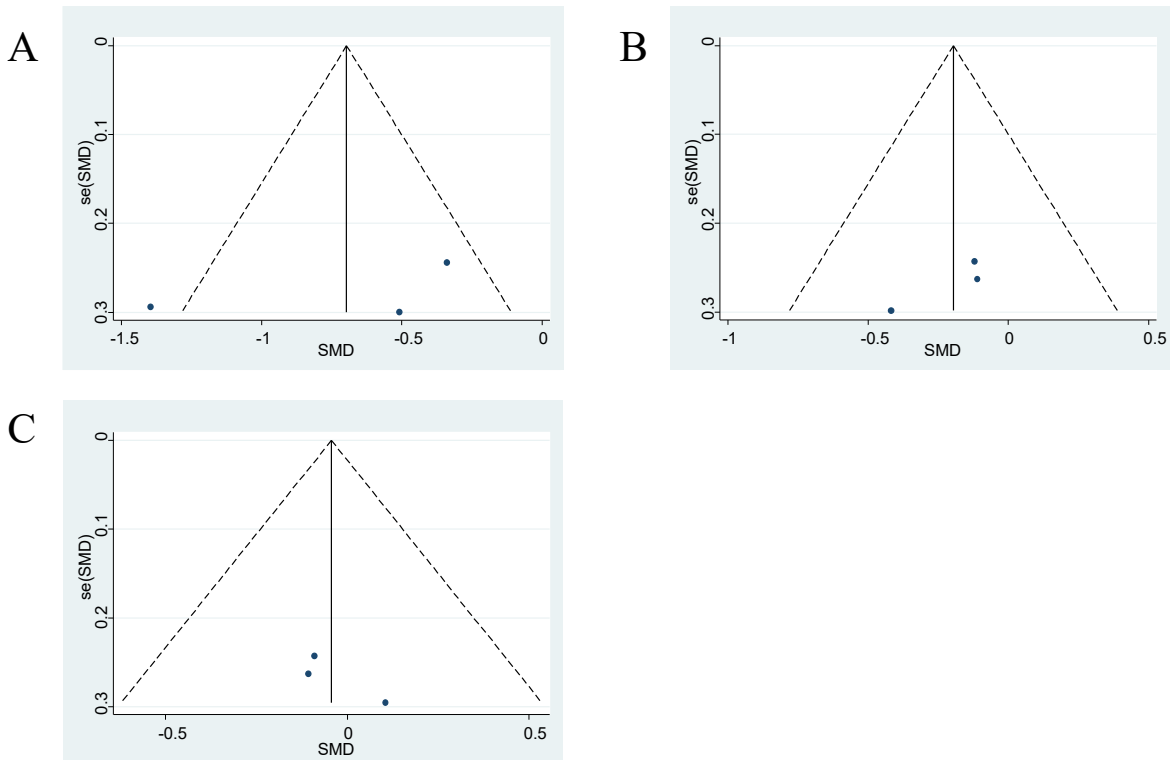

Figure S3: Funnel plot of VSC subgroups in short-term ( $\leq 4$  weeks): (A) H<sub>2</sub>S; (B) CH<sub>3</sub>S; (C) C<sub>2</sub>H<sub>6</sub>S.

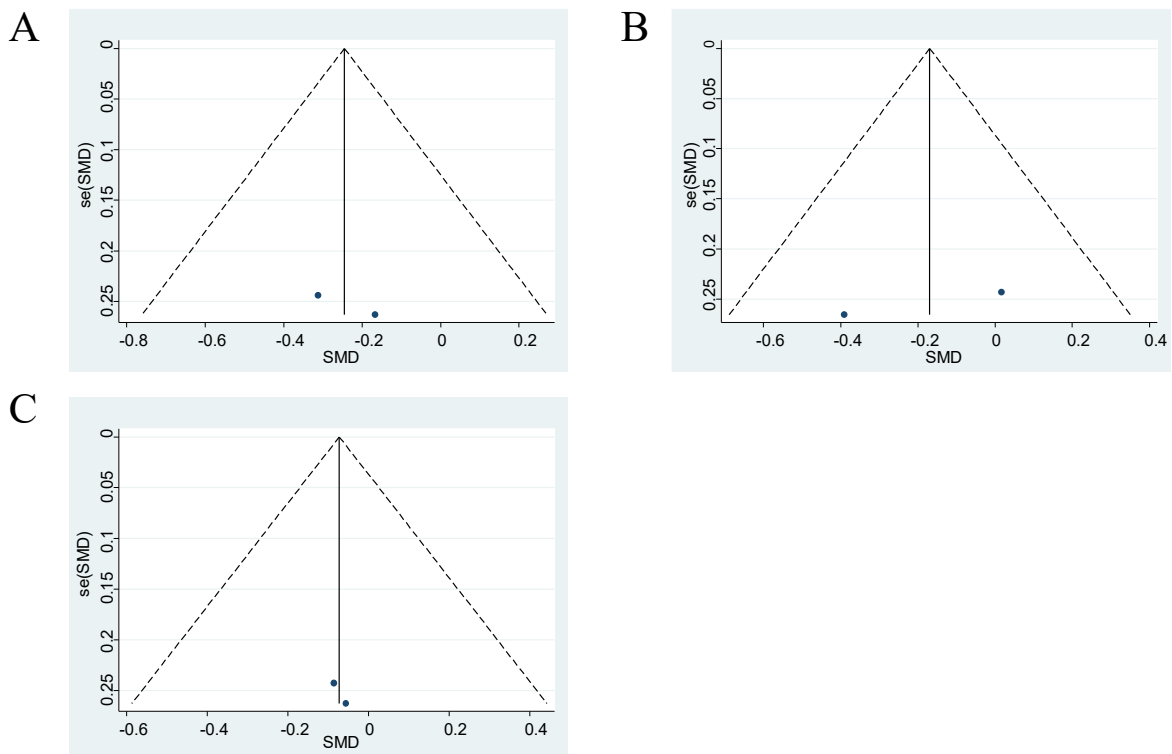

Figure S4: Funnel plot of VSC subgroups in long-term ( $> 4$  weeks): (A) H<sub>2</sub>S; (B) CH<sub>3</sub>S; (C) C<sub>2</sub>H<sub>6</sub>S.

A

| Egger's test |           |           |       |       |                      |           |
|--------------|-----------|-----------|-------|-------|----------------------|-----------|
| Std_Eff      | Coef.     | Std. Err. | t     | P> t  | [95% Conf. Interval] |           |
| slope        | -1.654658 | .4354301  | -3.80 | 0.032 | -3.04039             | -.2689248 |
| bias         | 3.312431  | 1.341309  | 2.47  | 0.090 | -.9562116            | 7.581074  |

B

| Egger's test |           |           |       |       |                      |          |
|--------------|-----------|-----------|-------|-------|----------------------|----------|
| Std_Eff      | Coef.     | Std. Err. | t     | P> t  | [95% Conf. Interval] |          |
| slope        | -.6982326 | .6453982  | -1.08 | 0.340 | -2.490145            | 1.09368  |
| bias         | 1.432804  | 2.079837  | 0.69  | 0.529 | -4.341748            | 7.207357 |

C

| Egger's test |           |           |       |       |                      |          |
|--------------|-----------|-----------|-------|-------|----------------------|----------|
| Std_Eff      | Coef.     | Std. Err. | t     | P> t  | [95% Conf. Interval] |          |
| slope        | -2.485861 | 1.282746  | -1.94 | 0.303 | -18.7847             | 13.81297 |
| bias         | 6.934603  | 3.728761  | 1.86  | 0.314 | -40.4438             | 54.313   |

D

| Egger's test |           |           |       |       |                      |          |
|--------------|-----------|-----------|-------|-------|----------------------|----------|
| Std_Eff      | Coef.     | Std. Err. | t     | P> t  | [95% Conf. Interval] |          |
| slope        | -.2878511 | 3.056969  | -0.09 | 0.940 | -39.13033            | 38.55463 |
| bias         | .8711259  | 8.860095  | 0.10  | 0.938 | -111.7071            | 113.4493 |

E

| Egger's test |           |           |       |       |                      |          |
|--------------|-----------|-----------|-------|-------|----------------------|----------|
| Std_Eff      | Coef.     | Std. Err. | t     | P> t  | [95% Conf. Interval] |          |
| slope        | 2.223943  | 3.837093  | 0.58  | 0.666 | -46.53094            | 50.97883 |
| bias         | -10.63929 | 13.91572  | -0.76 | 0.584 | -187.4552            | 166.1766 |

F

| Egger's test |           |           |       |       |                      |          |
|--------------|-----------|-----------|-------|-------|----------------------|----------|
| Std_Eff      | Coef.     | Std. Err. | t     | P> t  | [95% Conf. Interval] |          |
| slope        | 1.252312  | .6648476  | 1.88  | 0.311 | -7.195378            | 9.700003 |
| bias         | -5.480127 | 2.507946  | -2.19 | 0.273 | -37.3466             | 26.38635 |

G

| Egger's test |           |           |       |       |                      |          |
|--------------|-----------|-----------|-------|-------|----------------------|----------|
| Std_Eff      | Coef.     | Std. Err. | t     | P> t  | [95% Conf. Interval] |          |
| slope        | -1.041425 | .5483955  | -1.90 | 0.309 | -8.00945             | 5.926601 |
| bias         | 3.788236  | 2.074839  | 1.83  | 0.319 | -22.57509            | 30.15157 |

Figure S5: The result of Egger's test in short-term ( $\leq 4$  weeks): (A) OLP scores; (B) VSC concentrations; (C) TCS; (D) PI; (E) H<sub>2</sub>S; (F) CH<sub>3</sub>S; (G) C<sub>2</sub>H<sub>6</sub>S.

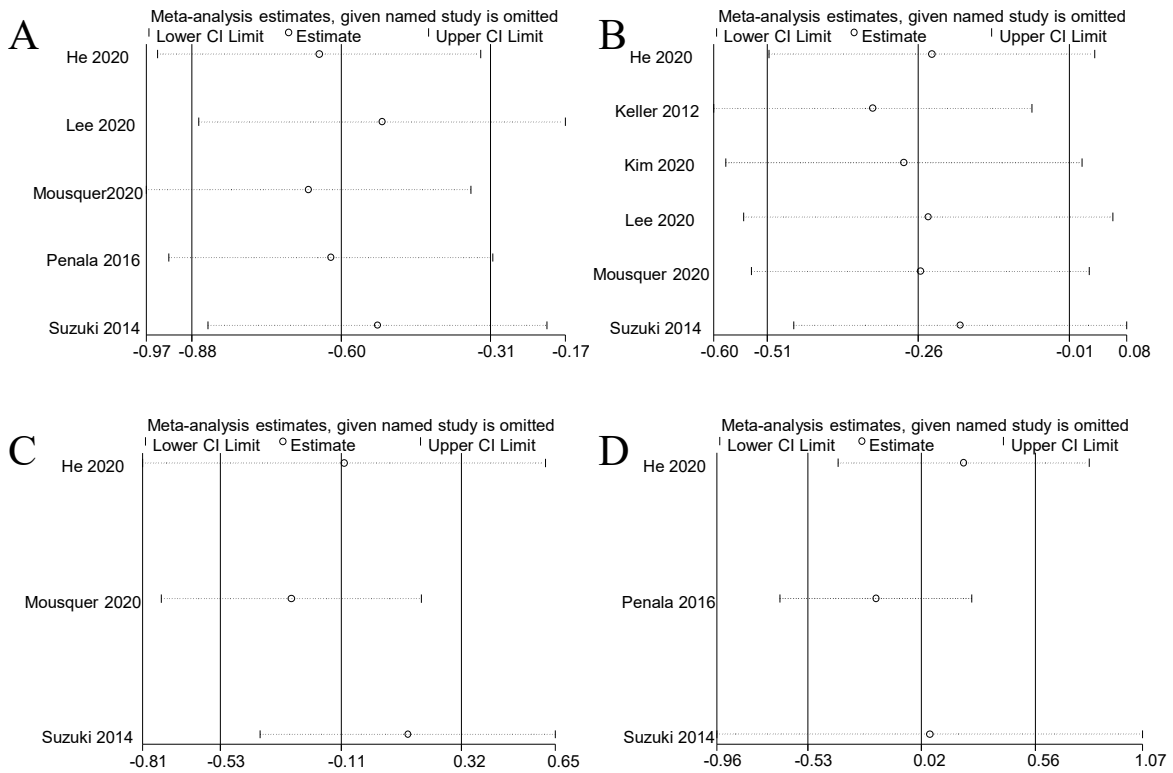

Figure S6: Sensitivity analysis of halitosis parameters in short-term ( $\leq 4$  weeks): (A) OLP scores; (B) VSC concentrations; (C) TCS; (D) PI.

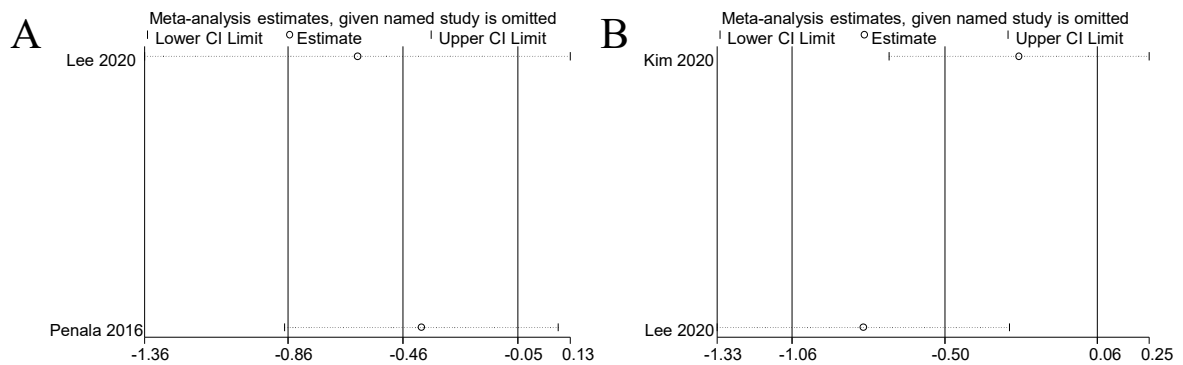

Figure S7: Sensitivity analysis of halitosis parameters in long-term ( $> 4$  weeks): (A) OLP scores; (B) VSC concentrations.

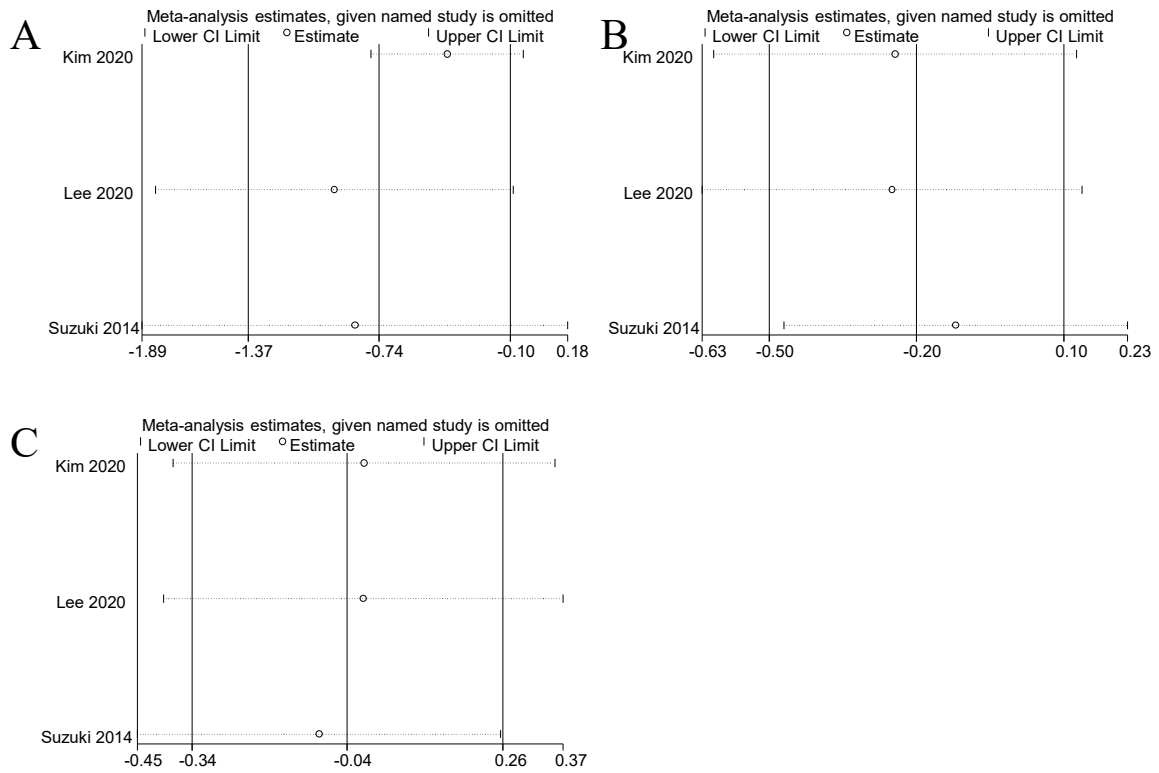

Figure S8: Sensitivity analysis of VSC subgroups in short-term ( $\leq 4$  weeks): (A)  $H_2S$ ; (B)  $CH_3S$ ; (C)  $C_2H_6S$ .

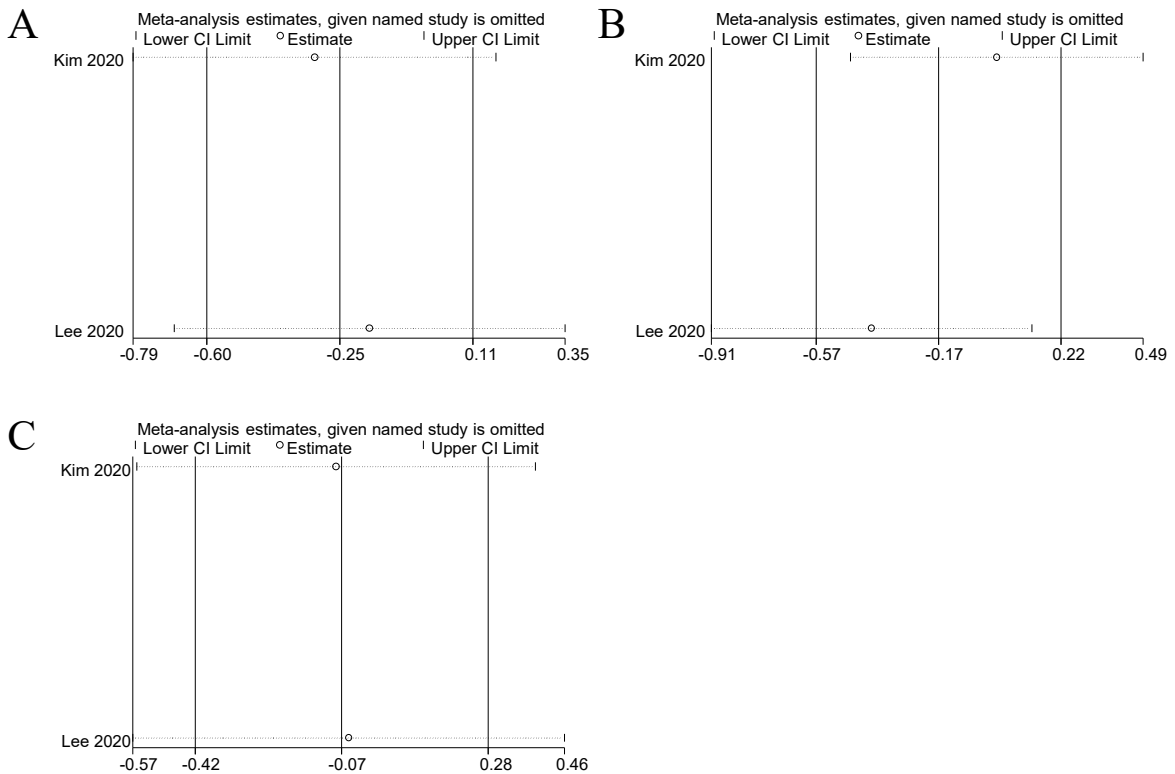

Figure S9: Sensitivity analysis of VSC subgroups in long-term ( $> 4$  weeks): (A)  $H_2S$ ; (B)  $CH_3S$ ; (C)  $C_2H_6S$ .
